1                   **Structural Basis for Antiarrhythmic Drug Interactions with**  
2                   **the Human Cardiac Sodium Channel**

3  
4  
5  
6  
7  
8                   **Phuong T. Nguyen<sup>1,3</sup>, Kevin R. DeMarco<sup>1,3</sup>, Igor Vorobyov<sup>1,2</sup>,**  
9                   **Colleen E. Clancy<sup>1,2\*</sup>, Vladimir Yarov-Yarovoy<sup>1\*</sup>**

10  
11  
12  
13  
14                   <sup>1</sup>Department of Physiology and Membrane Biology, University of California Davis, Davis,  
15                   United States;

16                   <sup>2</sup>Department of Pharmacology, University of California Davis, Davis, United States;

17                   <sup>3</sup>Biophysics Graduate Group, University of California Davis, Davis, United States

18  
19                   \*For correspondence:

20                   [ceclancy@ucdavis.edu](mailto:ceclancy@ucdavis.edu) (CEC)

21                   [yarovoy@ucdavis.edu](mailto:yarovoy@ucdavis.edu) (VY-Y)

22

23 **Abstract**

24

25 The human voltage-gated sodium channel, hNav1.5, is responsible for the rapid upstroke of the  
26 cardiac action potential and is target for antiarrhythmic therapy. Despite the clinical relevance of  
27 hNav1.5 targeting drugs, structure-based molecular mechanisms of promising or problematic  
28 drugs have not been investigated at atomic scale to inform drug design. Here, we used Rosetta  
29 structural modeling and docking as well as molecular dynamics simulations to study the  
30 interactions of antiarrhythmic and local anesthetic drugs with hNav1.5. These calculations  
31 revealed several key drug binding sites formed within the pore lumen that can simultaneously  
32 accommodate up to two drug molecules. Molecular dynamics simulations identified a hydrophilic  
33 access pathway through the intracellular gate and a hydrophobic access pathway through a  
34 fenestration between domains III and IV. Our results advance the understanding of molecular  
35 mechanisms of antiarrhythmic and local anesthetic drug interactions with hNav1.5 and will be  
36 useful for rational design of novel therapeutics.

## 37 Introduction

38

39 Voltage-gated sodium channels ( $\text{Nav}$ ) are transmembrane proteins that give rise to action potential  
40 generation and propagation in excitable cells. There are nine human  $\text{Nav}$  ( $\text{hNav}$ ) channel subtypes  
41 expressed in neuronal, cardiac, and muscle cells (Catterall et al., 2005). The cardiac  $\text{Nav}$  channel  
42 ( $\text{Nav1.5}$ ) plays a central role in congenital and acquired cardiac arrhythmias and has been an  
43 important target for antiarrhythmic drug development (Chandra et al., 1999; Chen-Izu et al., 2015;  
44 DeMarco & Clancy, 2016; Dumaine & Kirsch, 1998; Fredj, Lindegger, et al., 2006; Moreno et al.,  
45 2011). Nevertheless, longstanding failures in drug treatment of heart rhythm disturbances and  
46 many other syndromes, which stem from a persistent failure to predict the effective or harmful  
47 action of drugs. For example, the CAST ("Preliminary report: effect of encainide and flecainide  
48 on mortality in a randomized trial of arrhythmia suppression after myocardial infarction. The  
49 Cardiac Arrhythmia Suppression Trial (CAST) Investigators," 1989) and SWORD (Waldo et al.,  
50 1996) clinical trials showed that common antiarrhythmic drugs, such as encainide and flecainide,  
51 increased mortality and risk of sudden cardiac death in patients. Thirty years later, there is still no  
52 effective preclinical methodology to differentiate useful or potentially harmful drugs at the  
53 molecular level. In order to begin to develop and screen novel drugs to reveal the mechanisms  
54 of drug failure or efficacy for treatment of cardiovascular and other disorders (and to minimize  
55 side effects), a mechanistic understanding of drug interactions with  $\text{Nav}$  channels at the atomic  
56 scale is needed.

57

58  $\text{Nav}$  channels respond dynamically to changes in cell membrane voltage and adopt distinct  
59 conformational states: open (conducting), closed (non-conducting) and inactivated (non-  
60 conducting).  $\text{Nav}$  channels contain four homologous domains (DI-DIV), with each domain  
61 consisting of a voltage-sensing domain (VSD) containing transmembrane segments S1-S4 and a  
62 pore domain (PD) containing transmembrane segments S5 and S6 connected by a loop region with  
63 P1 and P2 helices forming selectivity filter (SF). Each VSD senses changes in membrane potential  
64 that leads to movement of its S4 segment which can, in turn, trigger channel activation (pore  
65 opening) or channel deactivation (pore closing) at the intracellular gate. The intracellular linker  
66 between domains DIII and DIV contains a hydrophobic isoleucine-phenylalanine-methionine  
67 (IFM) motif, which contributes to fast inactivation gating mechanism, resulting in rapid  
68 termination of  $\text{Na}^+$  conduction subsequent to the channel opening (Pan et al., 2018; Rohl et al.,  
69 1999; Shen et al., 2017; Vassilev et al., 1988; West et al., 1992; Yan et al., 2017). This inactivation  
70 process plays critical roles in  $\text{Nav}$  channel function and drug binding (Catterall, 2014; Hille, 2001).

71

72 Gating and conduction in  $\text{Nav}$  channels can also be modulated by drugs in a state-dependent  
73 manner (Hille, 1977; Hondeghem & Katzung, 1977). Inhibition of  $I_{\text{Na}}$  in a closed state is  
74 representative of a low affinity tonic block by neutral drugs accessing the  $\text{Nav}$  receptor site  
75 through a hydrophobic pathway through the cell membrane (Buyan et al., 2018; Hille, 1977).  
76 However, many drugs that block  $I_{\text{Na}}$  access the  $\text{Nav}$  receptor site through the intracellular  
77 hydrophilic pathway (Hille, 1977), and have a greater propensity for binding to the channel in  
78 open and inactivated states. In cardiac cells, drugs that exhibit slow unbinding kinetics during  
79 increased cell pacing can lead to use-dependent block (UDB), which has been shown to be  
80 potentially proarrhythmic (Moreno et al., 2011; Starmer et al., 1984). For this reason,  
81 investigations into the molecular determinants of the state dependence of drug binding to the  
82 open and inactivated states of  $\text{Nav}$  channels is important for understanding what makes a certain

83 class of drugs that target Nav channels safe, and others potentially proarrhythmic. Some of these  
84 drugs are commonly used as local anesthetics due to their action on neuronal Nav channels, and  
85 thus their cardiac safety is of paramount importance (Reiz & Nath, 1986).

86  
87 Forty years ago, Hille proposed two distinct access pathways for local anesthetics to the central  
88 binding site; the hydrophobic pathway through the membrane, and the hydrophilic pathway  
89 through the intracellular gate (Hille, 1977). Many antiarrhythmic and local anesthetic drugs are  
90 weak bases that exist in equilibrium between both neutral and charged forms at physiological  
91 pH. Neutral drugs may access the pore lumen binding site through both hydrophobic and  
92 hydrophilic pathways (Boiteux, Vorobyov, French, et al., 2014), but charged drugs are much  
93 more likely to access the pore binding site through the hydrophilic pathway, due to a large  
94 energetic penalty for traversing a lipid membrane (DeMarco et al., 2018). Extensive  
95 electrophysiological and site-directed mutagenesis experiments have identified a key receptor  
96 site for antiarrhythmic and local anesthetic drugs within the eukaryotic Nav channel pore lumen  
97 (Ragsdale et al., 1994, 1996; Yarov-Yarovoy et al., 2001; Yarov-Yarovoy et al., 2002). Mutations  
98 of two conserved aromatic residues in the domain IV S6 (DIVS6) segment of Nav channels,  
99 F1760 and Y1767 (hNav1.5 numbering) significantly reduce antiarrhythmic and local anesthetic  
100 drug binding (Ragsdale et al., 1994, 1996). Other key residues for drug binding within the pore  
101 lumen have been identified in DIS6 and DIIS6 segments (Yarov-Yarovoy et al., 2001; Yarov-  
102 Yarovoy et al., 2002). In addition, mutations within the Nav channel selectivity filter region can  
103 affect drug binding, either through enhancement of slow inactivation or formation of alternative  
104 access pathway (P. J. Lee et al., 2001; Sunami et al., 1997; Tsang et al., 2005).

105  
106 Structural studies have advanced our structural understanding of Nav channel - drug interaction  
107 mechanisms. The first crystal structure of the bacterial Nav channel NavAb revealed open  
108 fenestrations within the pore-forming domain (Payandeh et al., 2012; Payandeh et al., 2011),  
109 which supported the hypothesis that drugs can access the binding site within the pore lumen  
110 through the hydrophobic pathway. Crystal structures of NavMs and CavAb channels have been  
111 determined with drugs bound near the fenestration regions or in the pore lumen, suggesting the  
112 possibility of similar drug binding receptor sites in eukaryotic Nav channels (Bagneris et al., 2014;  
113 L. Tang et al., 2016). The first high-resolution structures of eukaryotic Nav channels have recently  
114 been resolved using cryo-electron microscopy (cryoEM). The *American cockroach* NavPaS  
115 channel structures have been solved in a closed state (Shen et al., 2018; Shen et al., 2017) and  
116 *electric eel* Nav1.4 channel structure has been solved in a partially open and presumably  
117 inactivated state (Yan et al., 2017). These structures have unlocked new opportunities to study  
118 drug interactions with eukaryotic Nav channels at the atomic scale.

119  
120 The Rosetta computational modeling software (Alford et al., 2017; Bender et al., 2016; Rohl et  
121 al., 2004; Simons et al., 1999) has been used to study conformational changes in Nav, voltage-  
122 gated potassium (Kv), voltage-gated calcium (Cav), and TRPV1 channels (Decaen et al., 2011;  
123 DeCaen et al., 2009; DeCaen et al., 2008; P. T. Nguyen et al., 2017; Pathak et al., 2007; Tuluc et  
124 al., 2016; Vargas et al., 2012; Yang et al., 2018; Yarov-Yarovoy et al., 2006; Yarov-Yarovoy et  
125 al., 2012) and peptide toxin interactions with Nav, Kv, and TRPV1 channels (Catterall et al., 2007;  
126 Cestele et al., 2006; Gupta et al., 2015; Kimball et al., 2016, 2018; Kimball et al., 2017; P. T.  
127 Nguyen et al., 2015; P.T. Nguyen et al., 2014; C. Tang et al., 2017; Tilley et al., 2014; J. Wang et  
128 al., 2011; S. Yang et al., 2015; Zhang et al., 2011, 2012). RosettaLigand flexible docking (DeLuca

129 et al., 2015) has been used to study small molecule interactions with Nav, TRPV1 and calcium-  
130 activated K<sup>+</sup> channels (H. M. Nguyen et al., 2017; P. T. Nguyen et al., 2018; Yang et al., 2016; F.  
131 Yang et al., 2015). Molecular dynamics (MD) simulations have previously revealed drug binding  
132 and access to bacterial Nav channels (Barber et al., 2014; Boiteux, Vorobyov, French, et al., 2014;  
133 Corry et al., 2014; Martin & Corry, 2014). Molecular docking of antiarrhythmic, local anesthetic,  
134 and anticonvulsant drugs with homology models of a eukaryotic Nav1.4 channel based on bacterial  
135 NavMs channel in an open state, has recently revealed electroneutral and cationic drug interactions  
136 with the phenylalanine in the DIVS6 segment (F1760 in human Nav1.5) and selectivity filter  
137 region (Tikhonov & Zhorov, 2017). Differences in binding of neutral and charged local  
138 anesthetics have been recently studied using the bacterial NavMs channel in an open state and  
139 eukaryotic NavPaS channel in a closed state (Buyan et al., 2018). Structural, experimental, and  
140 modeling studies have all provided a better understanding of drug interactions with bacterial Nav  
141 channels and models of eukaryotic Nav channels in open or closed states. However, atomistic  
142 details remain elusive for antiarrhythmic and local anesthetic drug access pathways, specific  
143 binding sites, and stoichiometry of binding to eukaryotic Nav channels in an inactivated state,  
144 which forms high affinity drug binding site (Carnevale, 2018).

145  
146 In this study, we used Rosetta to build a model of the human Nav1.5 (hNav1.5) channel in a  
147 partially open and presumably inactivated state based on the cryo-EM structure of the electric eel  
148 Nav1.4 channel and conducted a docking study to investigate the interactions of antiarrhythmic  
149 and local anesthetic drugs - lidocaine, QX-314, etidocaine, flecainide, and ranolazine – with  
150 hNav1.5. The results revealed that both antiarrhythmic and local anesthetic drugs share a receptor  
151 site formed by the S6 segments from domains III and IV. Multi-microsecond unbiased MD  
152 simulations of neutral lidocaine interacting with hNav1.5 using the Anton 2 supercomputer  
153 revealed a hydrophilic access pathway through the intracellular gate, and a novel hydrophobic  
154 access pathway through a fenestration between domains III and IV. Distinct binding sites were  
155 identified in the pore region for both neutral and charged lidocaine. And we observed that the  
156 channel can accommodate up to two lidocaine molecules binding at the same time. Our results  
157 reveal the high-resolution structural determinants of drug block of hNav1.5 in an inactivated state.  
158 They also serve as initial steps toward linking of structural determinants of channel - drug  
159 interactions to the modification of hNav1.5 function.  
160

## 161 **Results and discussion**

162

### 163 **A structural model of the human Nav1.5 channel based on electric eel Nav1.4 channel** 164 **structure**

165

166 To study the state-dependent molecular mechanisms of high affinity binding of antiarrhythmic and  
167 local anesthetic drugs to human Nav channels at the atomic scale, high-resolution structures of  
168 eukaryotic Nav channels in open and inactivated states are needed. The cryoEM structure of the  
169 electric eel Nav1.4 (eeNav1.4) channel in a partially open and presumably inactivated state (PDB  
170 ID: 5XSY) (Yan et al., 2017) provides atomic accuracy structural template for modeling of human  
171 Nav channels. The sequence identity between hNav1.5 and eeNav1.4 is ~84% in the pore-forming  
172 transmembrane region (Figure 1 – figure supplement 1), which is within an atomic level accuracy  
173 homology modeling range (Koehl & Levitt, 1999; Marti-Renom et al., 2000), allowing us to  
174 generate accurate model of hNav1.5 in a partially open and presumably inactivated state.

175

176 The human Nav1.4 (hNav1.4) structure was just published in September of 2018 (Pan et al., 2018),  
177 when this study was already completed. The sequence identity in the between hNav1.5 and  
178 hNav1.4 is only slightly higher (~87%) than sequence identity between hNav1.5 and eeNav1.4  
179 (~84%) over the pore-forming transmembrane region, which suggests that eeNav1.4 and hNav1.4  
180 structures are within the same range of accuracy for modeling of human Nav channels. The overall  
181 root mean square deviation (RMSD) between hNav1.4 and eeNav1.4 structures is less than 1 Å  
182 (Pan et al., 2018) and RMSD over the pore-forming domain segments S5 and S6 and P1- and P2-  
183 helices is less than 0.7 Å, which suggests very similar conformations of the pore-forming domain  
184 structure – the main focus of this study.

185

186 The eeNav1.4 structure has the following distinct structural features: 1) a partially open  
187 intracellular gate in the PD; 2) an activated state of domain III and IV VSDs; 3) an inactivation  
188 gate (“IFM” motif in domain III-IV linker) bound between S4-S5 linkers in domains III and IV  
189 and DIVS6 segment (Yan et al., 2017). Based on these observations, the eeNav1.4 structure  
190 potentially represents a partially open and presumably inactivated state, which has high affinity  
191 for antiarrhythmic and local anesthetic drugs (Ragsdale et al., 1994, 1996). We used the Rosetta  
192 structural modeling software (Alford et al., 2017; Bender et al., 2016; Rohl et al., 2004) with the  
193 eeNav1.4 channel structure as a template to build a homology model of hNav1.5 channel in a  
194 partially-open-inactivated state as described in Materials and Methods (Figure 1).

195

196 Key amino acid residues forming the putative antiarrhythmic and local anesthetic drug binding site  
197 in DIIS6 and DIVS6 segments (Ragsdale et al., 1994, 1996; Yarov-Yarovoy et al., 2001; Yarov-  
198 Yarovoy et al., 2002) are identical between hNav1.5 and eeNav1.4 (Figure 1– figure supplement  
199 2). For example, F1760 and Y1767 in the DIVS6 segment in hNav1.5 (Figure 1A) are F1555 and  
200 Y1562 in eeNav1.4, respectively. Moreover, L1462 and I1466 in the DIIS6 segment in hNav1.5  
201 (Figure 1A) are L1256 and I1260 in eeNav1.4, respectively. I1756 in the DIVS6 segment in  
202 hNav1.5 is also identical in eeNav1.4 (I1551) and forms part of the drug access pathway at the  
203 fenestration between the DIIS6 and DIVS6 segments (see Figure 1 – figure supplement 2)  
204 (Ragsdale et al., 1994). However, another key amino acid residue in the drug access pathway at  
205 the fenestration between DIIS6 and DIVS6 segments (Qu et al., 1995) is different between  
206 hNav1.5 and eeNav1.4: T1753 in the DIVS6 segment of hNav1.5 is C1548 in eeNav1.4 (see Figure

207 1B, Figure 1 – figure supplement 2, and Figure 1 – figure supplement 3). Notably, T1753 is facing  
208 L1413 in the P1-helix of DIII, which is a unique residue in the fenestration between the DIIS6  
209 and DIVS6 segments because all other Nav channel domains have a Phenylalanine at the  
210 corresponding position (see Figure 1 – figure supplement 3 and Figure 1 – figure supplement 4).  
211 These unique structural features of the fenestration between the DIIS6 and DIVS6 segments will  
212 be relevant for the MD simulations of the lidocaine access pathway discussed below.

213  
214 To determine whether the hNav1.5 channel model represents a conductive or non-conductive open  
215 state, we performed molecular dynamics (MD) simulations of the hNav1.5 model as described in  
216 Materials and Methods. The Rosetta hNav1.5 model and the eeNav1.4 structure both have a ~2.5  
217 Å pore radius within the intracellular gate region (Figure 1C, left panel) (Yan et al., 2017). During  
218 the MD simulation of the hNav1.5 model, the intracellular gate radius decreased from ~2.5 Å at  
219 the start of the simulation to ~2.0 Å after 0.5 μs and then to ~1.0 - 2.0 Å after 1 μs (Figure 1C).  
220 While we observed several Na<sup>+</sup> ions passing up and down between the selectivity filter region and  
221 the pore lumen, we did not detect any Na<sup>+</sup> ions passing through the intracellular gate of the pore  
222 during the 1 μs simulation (Figure 1C, right panel). Based on these results, we assume our hNav1.5  
223 model to be in a non-conductive inactivated state.

## 224 225 **Modeling of antiarrhythmic and local anesthetic drugs interaction with human Nav1.5** 226 **channel using RosettaLigand**

227  
228 To study high affinity binding of antiarrhythmic and local anesthetic drugs to the hNav1.5 pore in  
229 the non-conductive inactivated state at atomic scale, we used RosettaLigand (Bender et al., 2016;  
230 Davis & Baker, 2009; DeLuca et al., 2015; Lemmon & Meiler, 2012; Meiler & Baker, 2006) as  
231 described in Materials and Methods.

232  
233 *Lidocaine* is a local anesthetic and class Ib antiarrhythmic drug used for the treatment of ventricular  
234 arrhythmias (Singh, 1997). Experimental data suggest that phenylalanine and tyrosine residues in  
235 the DIVS6 segment of mammalian Nav channels (F1760 and Y1767 in hNav1.5) play a key role  
236 in antiarrhythmic and local anesthetic drug binding (Ragsdale et al., 1996). The most frequently  
237 sampled lowest binding energy RosettaLigand models of neutral or charged lidocaine interacting  
238 with hNav1.5 indicate that the region above F1760 in the DIVS6 segment forms a “hot spot” for  
239 lidocaine binding (Figure 2A and B and Figure 2 – figure supplement 1 and 2). This “hot spot”  
240 extends from the fenestration between the DIIS6 and DIVS6 segments into the pockets under the  
241 selectivity filter region in DIII and DIV. The tertiary amine group of neutral and charged lidocaine  
242 is positioned above F1760 (Figure 2A and B). The phenyl ring of neutral and charged lidocaine is  
243 observed in multiple different orientations near F1760 (Figure 2A and B and Figure 2 – figure  
244 supplement 1 and 2). We observed only one neutral and one charged lidocaine pose among the  
245 lowest energy models near Y1767 (Figure 2 – figure supplement 1 and 2), potentially reflecting a  
246 lower affinity binding site near this residue and in agreement with a weaker impact of Y1767  
247 mutations on drug binding compared to F1760 mutations (Ragsdale et al., 1994, 1996).  
248 Experimental data suggest that leucine and isoleucine residues in the DIIS6 segment of  
249 mammalian Nav channels (L1462 and I1466 in hNav1.5) also form receptor site for antiarrhythmic  
250 and local anesthetic drug binding (Nau et al., 2003; Yarov-Yarovoy et al., 2001). The L1462  
251 residue is positioned near F1760 in our model (Figure 2A and B). However, I1466 is not in direct

252 contact with lidocaine in any of top neutral and charged lidocaine models, suggesting an allosteric  
253 effect of mutations at this position on drug binding.

254  
255 To validate the robustness of the RosettaLigand prediction of the “hot spot” for lidocaine binding,  
256 we explored modeling of two well-studied lidocaine variants – QX-314 and etidocaine.

257  
258 *QX-314* is a permanently charged derivative of lidocaine with a quaternary ammonium group. The  
259 most frequently sampled lowest binding energy RosettaLigand models of QX-314 interacting with  
260 hNav1.5 indicate that the region above F1760 in the DIVS6 segment forms a “hot spot” for QX-  
261 314 binding (Figure 2C and Figure 2 – figure supplement 3), which is similar to the “hot spot”  
262 observed in our lidocaine – hNav1.5 models. The ammonium group of QX-314 is positioned above  
263 F1760 (Figure 2C). The phenyl ring of QX-314 is observed in multiple different orientations near  
264 F1760 (Figure 2C and Figure 2 – figure supplement 3).

265  
266 *Etidocaine* is a local anesthetic drug that was used in the first experimental study by the Catterall  
267 group that identified key residues of the receptor site for state-dependent block in both the DIVS6  
268 segment (F1760 and Y1767 in hNav1.5) (Ragsdale et al., 1994) and the DIIS6 segment (L1462  
269 and I1466 in hNav1.5) (Yarov-Yarovoy et al., 2001). The most frequently sampled lowest binding  
270 energy RosettaLigand models of charged etidocaine show the molecule binding above F1760 in  
271 the DIVS6 segment (Figure 2D and Figure 2 – figure supplement 4), which is similar to the “hot  
272 spot” observed in our lidocaine and QX-314 – hNav1.5 models. The ammonium group of  
273 etidocaine is positioned above and near F1760 (Figure 2D). The phenyl ring of etidocaine is  
274 observed in multiple different orientations near F1760 (Figure 2D and Figure 2 – figure  
275 supplement 4).

276  
277 *Flecainide* is a class 1c antiarrhythmic drug used to prevent and treat tachyarrhythmias, which also  
278 may have unpredictable proarrhythmic effects (Anderson et al., 1984; Benhorin et al., 2000;  
279 Holmes & Heel, 1985; Liu et al., 2003; Liu et al., 2002). Experimental data suggest that flecainide  
280 preferentially binds to Nav channels in an open state and that phenylalanine and tyrosine residues  
281 in the DIVS6 segment (F1760 and Y1767 in hNav1.5) play an important role in its binding (Liu et  
282 al., 2003; Liu et al., 2002; Ragsdale et al., 1996; G. K. Wang et al., 2003). The most frequently  
283 sampled lowest binding energy RosettaLigand models of flecainide in hNav1.5 are consistent with  
284 the other drugs in that the region above F1760 in the DIVS6 segment also forms a “hot spot” for  
285 flecainide binding (Figure 3A and Figure 3 – figure supplement 1). However, the larger and  
286 branched structure of flecainide compared to lidocaine, etidocaine, and QX-314 results in a greater  
287 surface area of interaction that spans from the fenestration region between the DIII and DIV to the  
288 ion conduction pathway under the selectivity filter region (Figure 3A).

289  
290 *Ranolazine* is an anti-anginal drug that inhibits late Nav current. Experimental data suggest that  
291 ranolazine binds to Nav channels in an open state and that phenylalanine in the DIVS6 segment  
292 (F1760 in hNav1.5) plays key role in its binding (Fredj, Sampson, et al., 2006; G. K. Wang et al.,  
293 2008). The most frequently sampled lowest binding energy RosettaLigand models of ranolazine  
294 show that the same region above F1760 in the DIVS6 segment forms the “hot spot” for ranolazine  
295 binding (Figure 3B and Figure 3 – figure supplement 2). Ranolazine has a flexible linear rather  
296 than branched structure and interacts via the same modality as flecainide over a larger surface area



297 that spans from the fenestration region between the DIII and DIV to the ion conduction pathway  
298 under the selectivity filter region (Figure 3B).

299  
300 Overall, the RosettaLigand docking results suggest that the region above F1760 in DIVS6 forms a  
301 “hot spot” for binding of antiarrhythmic and local anesthetic drugs and includes the interface  
302 between the DIIS6 and DIVS6 segments and the pocket under the selectivity filter region in DIII  
303 and DIV. The key role of F1760 in hNav1.5 and the equivalent phenylalanine residue in other Nav  
304 channels agrees with experimental data for multiple antiarrhythmic and local anesthetic drugs  
305 (Fredj, Sampson, et al., 2006; Liu et al., 2003; Liu et al., 2002; Ragsdale et al., 1994, 1996; G. K.  
306 Wang et al., 2008; G. K. Wang et al., 2003). Positioning of the drugs between the DIIS6 and  
307 DIVS6 segments in our models is in agreement with the Chanda Lab structural hypothesis that  
308 local anesthetics may act as a “wedge” to stabilize primarily VSDIII and partially VSDIV in  
309 activated states (Muroi & Chanda, 2009). The position of the drugs under the selectivity filter  
310 region in DIII and DIV is notable with respect to several mutations in this region that have been  
311 shown to significantly affect the slow inactivation of Nav channels (Balser et al., 1996; Kambouris  
312 et al., 1998; Ong et al., 2000; Todt et al., 1999). We hypothesize that upon binding above F1760  
313 in DIVS6 and under the selectivity filter region in DIII and DIV the antiarrhythmic and local  
314 anesthetic drugs may induce conformational changes that may enhance slow inactivation of Nav  
315 channels in agreement with experimental data (Chen et al., 2000; Fukuda et al., 2005). We also  
316 propose that since the antiarrhythmic drugs ranolazine and flecainide have more extensive  
317 interactions with the channel compared to lidocaine and its derivatives in our models (see Figures  
318 2 and 3), their effect on channel gating might be more prominent as well. In fact, our recent multi-  
319 scale kinetic modeling and experimental study examined lidocaine and flecainide interactions with  
320 Nav1.5 and their consequence on pro-arrhythmia proclivities (Moreno et al., 2011). We found,  
321 for example, that cardiac-safe lidocaine has faster channel unbinding kinetics, resulting in more  
322 facile recovery of channels from drug blockade, and lower incidence of reentrant arrhythmias at a  
323 cardiac tissue and a whole heart level compared to flecainide.

### 324 325 **Neutral and charged lidocaine partitioning into the membrane**

326  
327 The molecular docking calculations, described above, provided us with atomistic structural models  
328 of convergent binding poses of several anti-arrhythmic and local anesthetic drugs in the hNav1.5  
329 pore. However, static molecular models cannot tell us how a drug accesses the binding site and  
330 whether such drug - protein interactions are long-lived or transient. Such information can be  
331 provided by atomistic molecular dynamics (MD) simulations of a channel embedded in a hydrated  
332 lipid membrane with one or multiple drug molecules present. To perform such simulations, we  
333 need accurate atomic-resolution structural models, called empirical force fields, for all the system  
334 components. For this study, we used biomolecular and generalized all-atom CHARMM force  
335 fields, which were previously utilized by our and other groups to study bacterial Nav channel  
336 conduction and drug binding (Boiteux, Vorobyov, & Allen, 2014; Boiteux, Vorobyov, French, et  
337 al., 2014; Chakrabarti et al., 2013; Corry & Thomas, 2012; Lenaeus et al., 2017; Martin et al.,  
338 2014).

339  
340 We focused the MD simulations on hNav1.5 interactions with charged and neutral forms of  
341 lidocaine. This widely used antiarrhythmic and local anesthetic drug was chosen for our  
342 exploratory MD study because molecular docking calculations and previous experimental data

343 indicate that it shares the same binding site as larger Nav1.5 blockers such as flecainide and  
344 ranolazine. Our previous MD simulation study of drug – bacterial Nav channel interactions  
345 suggested that we can more efficiently predict entry and egress pathways for a smaller drug, like  
346 the local anesthetic benzocaine, compared to the larger anti-epileptic drug phenytoin (Boiteux,  
347 Vorobyov, French, et al., 2014). Indeed, experimental data indicate that lidocaine has faster  
348 Nav1.5 association and dissociation kinetics than the larger flecainide (Moreno et al., 2011).  
349 Moreover, in aqueous solution lidocaine exists as a mixture with a substantial fractions of both  
350 charged (~78% at pH=7.4) and neutral form (~22% at pH=7.4) which have different membrane  
351 permeabilities and can interact with the ion channels via distinct pathways, as was discussed above.  
352 Previous experimental and simulation studies suggested that charged and neutral forms of  
353 lidocaine differently affect Nav channel function (Buyan et al., 2018; Moreno et al., 2011; O'Leary  
354 & Chahine, 2018; Tikhonov & Zhorov, 2017). Therefore, in this study we have explored charged  
355 and neutral lidocaine – lipid membrane and Nav1.5 interactions via all-atom MD simulations. We  
356 developed force field parameters for charged and neutral lidocaine, because they are not available  
357 in the standard biomolecular (Huang & MacKerell, 2013; Klauda et al., 2010) or generalized  
358 CHARMM force field (CGENFF) (Vanommeslaeghe et al., 2010b). We used gas-phase quantum  
359 mechanical (QM) drug geometries, vibrational frequencies, dihedral angle profiles, dipole  
360 magnitude and direction as well as interactions with water in different orientations as reference  
361 values for the parameter development, as described in Appendix and illustrated in Figure 4 – figure  
362 supplement 1 and 2 and Tables S1-S3.

363 The derived parameters were validated by performing MD simulations of charged and neutral  
364 lidocaine partitioning across a 1-palmitoyl-2-oleoyl-phosphatidylcholine (POPC) lipid membrane  
365 and computing the water-membrane distribution coefficient  $\log D = 1.25$ , which agrees favorably  
366 with the experimental value of 1.76 (Avdeef et al., 1998). Lidocaine free energy profiles, used to  
367 obtain our  $\log D$  estimate using Eq. 2 below are shown in Figure 4 – figure supplement 3 and  
368 demonstrate that there is a higher barrier for charged vs. neutral lidocaine translocation across a  
369 lipid membrane in agreement with a previous study using different drug models (Buyan et al.,  
370 2018). However, contrary to ~5 kcal/mol free energy well at the membrane center for neutral  
371 lidocaine in that study (Buyan et al., 2018), our simulations predict an interfacial minimum of -  
372 1.09 kcal/mol at  $|z| = 13 \text{ \AA}$  and a ~4.64 kcal/mol peak at the membrane center (Figure 4 – figure  
373 supplement 3). We also obtained even more favorable interfacial binding of -3.07 kcal/mol at  $|z|$   
374 = 15  $\text{\AA}$  for charged lidocaine, which despite a larger peak of 6.58 kcal/mol at the membrane center  
375 leads to a more favorable membrane partitioning of this form (cf. partitioning coefficients for  
376 neutral and charged lidocaine forms,  $\log K_0 = 0.12$  and  $\log K_I = 1.35$  respectively). We also used an  
377 approximation of Kramer's transition rate theory to estimate the transition rates (Allen et al., 2003;  
378 Crouzy et al., 1994) of charged and neutral forms of lidocaine through a simulated POPC bilayer.  
379 We used the same approach as in our previous study (DeMarco et al., 2018) and for charged and  
380 neutral lidocaine computed their diffusion coefficients (Hummer, 2005) close to the membrane  
381 center using Hummer's method, as well as the curvatures around the binding wells and peaks (i.e.  
382 free energy minima and maxima), estimated from second derivatives of second-order polynomial  
383 fits to the relevant portion of each respective free energy profile. Estimated transition rates through  
384 the membrane are  $38.9\text{s}^{-1}$  for charged lidocaine and  $21.1\text{ms}^{-1}$  for the neutral drug form, indicating  
385 three orders of magnitude faster crossing rate for the latter.

386 Since charged lidocaine is the dominant drug form at a physiological pH 7.4 (~78.4% based on its

387  $pK_a = 7.96$ ) (Pless et al., 2011), we primarily expect the accumulation of charged drug at water-  
388 membrane interfaces, in agreement with recent solid NMR experiments (Weizenmann et al.,  
389 2012). However, deeper into the hydrophobic membrane core, neutral lidocaine is expected to be  
390 the more dominant form and should be able to translocate across a membrane more easily due to  
391 the substantially smaller barrier than its protonated counterpart (~6 kcal/mol vs. ~10 kcal/mol)  
392 (Figure 4 – figure supplement 3). This indicates that we need to study both charged and neutral  
393 lidocaine interactions with hNav1.5 to assess hydrophobic (lipid-mediated access through channel  
394 fenestrations) and hydrophilic (water-mediated access through an intracellular gate) channel pore  
395 drug access pathways and understand molecular mechanisms of channel activity modulation.

396

### 397 **Molecular dynamics simulations reveal neutral lidocaine access pathways to the binding** 398 **site via the intracellular gate and fenestration between domains III and IV**

399

400 To explore the lidocaine access pathways to its binding site within the hNav1.5 channels, we ran  
401 multi-microsecond MD simulations on the Anton 2 supercomputer (Shaw et al., 2014) with neutral  
402 or charged lidocaine, as described in Materials and Methods. The MD simulations of neutral  
403 lidocaine revealed that it can access its binding site within the Nav channel pore lumen either  
404 through an opening formed by the intracellular gate (hydrophilic pathway) or through a path  
405 formed between the lipids, the P1-helix in DIII, the P2-helix in DIV, and the fenestration region  
406 between domains III and IV (hydrophobic pathway) (see Figure 4 and Supplemental Movies 1 and  
407 2). The hydrophilic pathway is formed by the following residues at the intracellular gate (see sites  
408 I1 and I2 in Figure 4A and C): L404, I408, V412 (DIS6), L931, F934, L935, L938 (DIIS6), L1462,  
409 I1466, I1470 (DIIS6), and V1764, Y1767, I1768, I1771 (DIVS6). Notably, all of the residues  
410 lining the intracellular gate in human Nav channels are hydrophobic and highly conserved. The  
411 hydrophobic pathway between domains III and IV is formed by the following residues (see sites  
412 E1, E2, C1, and C2 in Figure 4A and 4C): L1338, L1342, W1345 (in DIIS5), L1410, L1413,  
413 Q1414 (in P1-helix of DIII), L1462, F1465 (in DIIS6), W1713, L1717, L1721 (in P2-helix of  
414 DIV), and I1749, T1753, I1756, I1757 (in DIVS6). Remarkably, lidocaine molecules that accessed  
415 the pore binding sites (C1, C2 sites) are not those partitioned from lipid membrane. Lidocaine  
416 accessed the fenestration between domains III and IV from the extracellular side by going through  
417 the cleft formed between P1-DIII and P2-DIV (E1, E2 sites). Furthermore, F1760 (in DIVS6) and  
418 L1462 (in DIIS6) are the first residues that lidocaine encounters as it enters the pore lumen  
419 through the fenestration region – both of these residues are forming the “hot spot” for all the drugs  
420 simulated using RosettaLigand (see Figures 2 and 3). Moreover, neutral lidocaine was found to  
421 access the receptor site via the fenestration between domains III and IV, but not through the  
422 fenestrations between the other domains. We hypothesize that specific amino acid differences  
423 between the residues forming the fenestration between domains III and IV versus residues forming  
424 fenestrations between all other domains are preventing lidocaine from accessing the receptor site  
425 through the other fenestrations (Figure 1 – figure supplement 3 and Figure 1 – figure supplement  
426 4).

427

428 We found this observation of the hydrophobic pathway very intriguing. Although early work on  
429 local anesthetics and quaternary derivatives provided compelling evidence for a hydrophobic  
430 pathway as a result of drug partitioning into lipid membrane (Frazier et al., 1970; Hille, 1977;  
431 Narahashi et al., 1970; Strichartz, 1973), variants of different channel isoforms appeared to have  
432 a specific residue dependent external access pathway. Membrane-impermeant QX-314 was shown

433 to block the cardiac isoform Nav<sub>v</sub>1.5 in rats (rNav<sub>v</sub>1.5) when applied from either side of the  
434 membrane. The blocking effect of extracellular QX-314 was reduced by substitution of DIVS6  
435 T1755 in cardiac rNav<sub>v</sub>1.5 (equivalent to T1753 in hNav<sub>v</sub>1.5) to valine in brain rNav<sub>v</sub>1.2 (Qu et al.,  
436 1995). Similarly, mutation of the equivalent residue C1572 in muscle rNav<sub>v</sub>1.4 to threonine in  
437 cardiac rNav<sub>v</sub>1.5 also allowed QX-222 to block the channel from the extracellular side (Sunami et  
438 al., 2000). In addition, mutations of I1575 in DIVS6 of muscle rNav<sub>v</sub>1.4 or equivalent residue I1760  
439 in brain rNav<sub>v</sub>1.2 (I1756 in hNav<sub>v</sub>1.5) to alanine (relatively small amino acid) created external access  
440 pathway for QX-222 (Sunami et al., 2001). Remarkably, these residues (T1753 and I1756 in  
441 DIVS6 in hNav<sub>v</sub>1.5) are part of the E2 and C1 binding sites forming the hydrophobic pathway in  
442 our simulations (Figure 4). We hypothesize that equivalent positions in other Nav channels could  
443 form a hydrophobic pathway for drug access from the extracellular environment for both neutral  
444 and charged drugs. While neutral drugs may pass along the hydrophobic pathway to access the  
445 binding site within the pore lumen, charged drugs may pass along this pathway only if polar or  
446 small side chain amino acids are present in this critical region to lower the energy barrier for drug  
447 access. Results from previously published experimental data provide structural explanations for  
448 the ultra-fast blocking kinetics of extracellularly applied neutral drugs on Nav channels (Hille,  
449 1977). This hydrophobic drug access pathway in our simulations also revealed another interesting  
450 observation. Neutral lidocaine is climbing down the vertical lipid – channel interface formed by  
451 the P1-helix in DIII, P2-helix in DIV, and DIII-DIV fenestration (Supplemental Movie 2). Since  
452 neutral lidocaine is amphipathic, this could be considered to be an energetically favorable pathway.  
453 We hypothesize that other ion channels and transmembrane proteins can adopt a similar  
454 amphipathic drug access pathway at the interface between lipid and protein environments.

455

### 456 **Molecular dynamics simulations reveal two *neutral* lidocaines simultaneously binding** 457 **within the hNav<sub>v</sub>1.5 channel pore lumen**

458

459 Our unbiased simulations of neutral lidocaine revealed up to two lidocaine molecules binding  
460 within the channel pore lumen (Figure 5). When there is one molecule in the pore, neutral lidocaine  
461 is localized at two distinct binding sites NA1 and NA2. NA1 is the binding site at the center of the  
462 pore, involving Y1767 and other residues from the S6 segment of all four domains. There are  
463 limited contacts of neutral lidocaine with F1760 in the NA1. The NA2 binding site is positioned  
464 on top of F1760, near the DIII-DIV fenestration and under the P1 helix in DIII, which is similar to  
465 the most frequent and lowest interface energy pose for neutral lidocaine observed by  
466 RosettaLigand (Figure 2A). Both the amine group and the phenyl ring of lidocaine form  
467 interactions with F1760, L1462 and I1466. Two lidocaine molecules in the pore can occupy both  
468 of the NA1 and NA2 binding sites, which are sampled by a sole lidocaine molecule in the pore  
469 (Figure 5). The first neutral lidocaine in our model is positioned in a binding site formed by a  
470 region above F1760 and under the P1-helix in DIII, and fenestration region between DIII-DIV, i.e.  
471 a site equivalent to NA1 for one lidocaine in the pore. The second neutral lidocaine is positioned  
472 between F1760 and Y1767 in the central pore, resembling a single lidocaine NA1 binding site. We  
473 classify them in general as DIVS6 F1760 binding site and central pore binding site. While the  
474 lidocaine binding at F1760 is unchanged during simulations, lidocaine binding at the central pore  
475 can shift up and down, thus creating two states of binding NB1 and NB2 (Figure 5). These  
476 observations from our simulations are in agreement with experimental data showing that F1760  
477 and Y1767 in hNav<sub>v</sub>1.5 play key roles in lidocaine binding (Ragsdale et al., 1996). It is also  
478 noticeable that the DIII selectivity filter region residue K1419 is part of the “DEKA” motif and

479 plays an important role in Nav channel selectivity (Hilber et al., 2005; Perez-Garcia et al., 1997).  
480 Mutations of K1419 to serine or glutamate enhance slow inactivation of Nav channels (Todt et al.,  
481 1999). It is possible that while binding at the central pore can provide a simple steric blocking  
482 mechanism, lidocaine binding at F1760 and the P1-helix in DIII may directly interfere with the  
483 normally conductive state of the selectivity filter region and induce a conformational change that  
484 may promote transition to the slow inactivated state. Remarkably, cooperative binding of multiple  
485 lidocaine molecules to Nav channels have been previously suggested based on dose response of  
486 inhibition with a Hill coefficient value greater than 1 (Leuwer et al., 2004). Furthermore, N-linked  
487 lidocaine dimers have been previously shown to bind to Nav channels with 10-100-fold higher  
488 affinity than lidocaine monomers (Smith et al., 2006). These experimental observations agree with  
489 our MD simulation results and suggesting that lidocaine may have at least two “hot spots” for  
490 binding within the Nav channel pore lumen formed between the P1 helix from domain III, F1760,  
491 and Y1767.

492

### 493 **Molecular dynamics simulations reveal two unique “hot spots” for binding of *charged*** 494 **lidocaine in the hNav1.5 channel pore lumen**

495

496 Unbiased MD simulations of high concentrations of charged lidocaine molecules placed in  
497 aqueous solution have shown that the drug did not pass either through the opening formed by the  
498 hydrophobic intracellular gate or through the fenestration between domains III and IV during 1  $\mu$ s  
499 simulation (data not shown). Combined with results from our calculation of charged lidocaine  
500 membrane partitioning above, we suspect that those events may not be effectively sampled in a  
501 few microseconds simulation time. To further understand interactions of charged lidocaine with  
502 the hNav1.5 channel, we explored potentially unique binding poses by starting simulations with  
503 one or two charged lidocaines in the pore lumen, as described in Materials and Methods.

504

505 Simulation of one charged lidocaine revealed two highly convergent binding states lining along  
506 the vertical pore axis with the protonated amine (i.e. cationic ammonium) group of lidocaine in  
507 close proximity to the DI and DII selectivity filter region and the phenyl group of lidocaine  
508 pointing down into the lumen (see CA1 and CA2 states in Figure 6A). The CA1 state represents  
509 binding of charged lidocaine at the central pore with the protonated amine group attracted to the  
510 electron negative region below the selectivity filter. Interestingly, most of the time during the  
511 simulation, lidocaine binding in CA1 appeared to have a sodium ion binding in the selectivity  
512 filter, right above the protonated amine group. Whereas, in the absence of sodium binding in the  
513 CA2 state, charged lidocaine binds directly to the selectivity filter with the sodium binding site  
514 being taken by the protonated amine. We found that this result highly agrees with a variety of  
515 functional, structural and computational data suggesting that the selectivity filter region may form  
516 a part of local anesthetic drug binding (Bagneris et al., 2014; Buyan et al., 2018; Sunami et al.,  
517 1997; Tikhonov & Zhorov, 2017). However, compared to single neutral lidocaine binding result,  
518 we did not see the involvement of F1760 in binding of one charged lidocaine. We assume this is a  
519 result of limited sampling from 1 $\mu$ s unbiased simulation, although a similar result was observed  
520 in the simulation of charged lidocaine with open NavMs and closed NavPaS channel using an  
521 enhanced sampling technique of replica exchange solute tempering (Buyan et al., 2018).

522

523 Simulation of two charged lidocaines revealed two localized binding sites, a DIVS6 F1760 binding  
524 site and a central pore binding site, similar to the case of neutral lidocaine. While lidocaine binding

525 at the F1760 site is relatively stable, binding to the central pore can be shifted creating two highly  
526 convergent states, CB1 and CB2 (Figure 6). The first highly converged state (CB1) has one  
527 charged lidocaine lining along the vertical pore axis with the protonated amine group in close  
528 proximity to the DI and DII selectivity filter region and the phenyl group pointing down into the  
529 lumen (see CB1 state in Figure 6B), the same orientation as for one lidocaine molecule (CA1 state  
530 in Fig. 6A). Another charged lidocaine at the DIVS6 F1760 site has the protonated amine group  
531 forming cation- $\pi$  interactions with F1760 and the phenyl group pointing into the fenestration  
532 region between DIII and DIV (see CB1 state in Figure 6B). Notably, the cation- $\pi$  interaction is  
533 dominant during the simulation. We rarely observed  $\pi$ - $\pi$  stacking interactions between the phenyl  
534 ring of charged lidocaine and F1760. This agrees with experimental data suggested that  
535 interactions between charged lidocaine and F1760 are cation- $\pi$  interactions, not  $\pi$ - $\pi$  interactions  
536 (Ahern et al., 2008). The second highly converged binding state (CB2) has the central pore  
537 localized charged lidocaine oriented mostly along the horizontal membrane plane (not the vertical  
538 transmembrane axis as in CB1) with the protonated amine group also in close proximity to the DI  
539 and DII selectivity filter region. However, the phenyl group is pointing into the fenestration region  
540 between DI and DII (see CB2 state in Figure 6B). The other charged lidocaine at the DIVS6 F1760  
541 site forms an interaction with F1760 in a similar manner to that in the CB1 state.  
542

543 It is interesting to note that F1760 has been shown to be a key determinant for the use-dependent  
544 block while Y1767 only has a modest effects (Ragsdale et al., 1994). In addition, mutation of  
545 W1531 to Cys in Nav1.4 (W1713 in our hNav1.5) in the DIV-P2 region was shown to abolish use-  
546 dependence of mexiletine and QX-222, without destabilizing fast inactivation or altering drug  
547 access (Tsang et al., 2005). In our model, W1713 is part of the binding site E2 for the neutral  
548 lidocaine pathway (Figure 4) and is the ceiling of the DIII-DIV fenestration, right above F1760.  
549 The best RosettaLigand docking models, MD simulations of both neutral and charged lidocaine  
550 identified the DIVS6 F1760 site as a common binding site. Together, these results encourage us to  
551 propose the binding site at DIVS6 F1760, near the DIII-DIV fenestration as the high affinity use-  
552 dependent binding site. Whereas, other binding sites at the selectivity filter region (for charged  
553 lidocaine) and at central pore near Y1767 (for neutral lidocaine) can be considered based on our  
554 simulations as low affinity binding sites. Tonic block was not the focus of this study and may  
555 require investigation of interactions with the channels in a resting state. However, because of the  
556 modest effect of F1760 and W1713 on tonic block (Ragsdale et al., 1994, 1996; Tsang et al., 2005),  
557 it may not be surprising if the tonic block binding site is similar to one of the low affinity binding  
558 sites we observed here for the interaction of lidocaine with a putatively inactivated state channel.  
559

### 560 **Lidocaine binding to hNav1.5 attenuates sodium binding in the selectivity filter**

561  
562 MD simulations of the hNav1.5 channel in the absence or presence of 1 or 2 neutral or charged  
563 lidocaine molecules suggest that binding of lidocaine to its receptor site(s) within the pore lumen  
564 reduces Na<sup>+</sup> ion binding within the selectivity filter region (Figure 7). Free energy surfaces for a  
565 Na<sup>+</sup> ion within the hNav1.5 selectivity filter reveal 3 major Na<sup>+</sup> binding sites within this region  
566 (see sites S1, S3, and S3 in Figure 7) and 1 additional site within the pore lumen (see site S0 in  
567 Figure 7). Site S1 is located just below the selectivity filter region and formed by the carbonyl  
568 groups of T370 and Q371 (in DI) and C896 and G897 (in DII). Site S2 is formed by the carboxylate  
569 groups of D372 (in DI) and E898 (in DII) – residues in the classical “DEKA” selectivity filter  
570 motif in Nav channels. Site S3 is formed by the carboxylate groups of E375 (in DI), E901 (in DII),

571 D1423 (in DIII), and D1714 (in DIV). In the absence of lidocaine, all 3 Na<sup>+</sup> binding sites are well-  
572 defined (Figure 7A and B). When 1 or 2 neutral lidocaine molecules are present in the pore lumen,  
573 the Na<sup>+</sup> binding site S1 diffuses further into the pore lumen region, while sites S2 and S3 within  
574 the selectivity filter region are occupied less frequently (Figure 7A and B). When 1 or 2 charged  
575 lidocaine molecules are present in the pore lumen, we observe a dramatic reduction in Na<sup>+</sup> binding  
576 at the pore lumen site S0 and within the selectivity filter region in all 3 sites, especially at sites S2  
577 and S3 (Figure 7A and B). This disruption of continuous ion density in those cases (see Figure 7A)  
578 may impair ion conduction through the selectivity filter.

579  
580 The positioning of neutral or charged lidocaine molecules under the selectivity filter region in the  
581 MD simulations is notable with respect to experimental data that have identified specific mutations  
582 in the selectivity filter region that significantly affect the slow inactivation of Nav channels (Balsler  
583 et al., 1996; Kambouris et al., 1998; Ong et al., 2000; Todt et al., 1999). Interestingly, decreasing  
584 extracellular [Na<sup>+</sup>] potentiates use-dependent block by lidocaine (Chen et al., 2000). Lidocaine  
585 binding under the selectivity filter region may induce conformational changes in the selectivity  
586 filter that may enhance slow inactivation (Chen et al., 2000; Fukuda et al., 2005). However, raising  
587 extracellular [Na<sup>+</sup>] inhibits native slow inactivation of Nav channels (Chen et al., 2000).

## 588 589 **Conclusions**

590  
591 Our structural modeling and simulation of antiarrhythmic and local anesthetic drugs interacting  
592 with the human Nav1.5 channel revealed the following key observations: (1) The region above  
593 F1760 in the DIVS6 segment forms a “hot spot” for drug binding and extends from the fenestration  
594 region between the DIIS6 and DIVS6 segments to the hydrophobic pockets under the selectivity  
595 filter regions in DIII and DIV; (2) The amine/ammonium group of lidocaine, etidocaine, and QX-  
596 314 is positioned above and near F1760 (Figure 2). The phenyl ring of lidocaine, etidocaine, and  
597 QX-314 is observed in multiple different orientations near F1760 (Figure 2); (3) Flecainide and  
598 ranolazine bind to a larger protein surface area that spans from the fenestration region between the  
599 DIII and DIV to the ion conduction pathway under the selectivity filter region; (4) Lidocaine enters  
600 the hNav1.5 pore via the hydrophilic pathway through the intracellular gate and via a hydrophobic  
601 pathway through a fenestration between DIIS6 and DIVS6 (Figure 4); (5) up to two lidocaine  
602 molecules can simultaneously bind within the hNav1.5 pore lumen (Figures 5 and 6); (6) bound  
603 lidocaine molecules can interfere with the ion occupancy in the hNav1.5 SF (Figure 7).

604  
605 Our results provide crucial atomic scale mechanistic insights into protein – drug interactions,  
606 necessary for the rational design of novel modulators of the cardiac Nav channel to be used for the  
607 treatment of cardiac arrhythmias. The fundamental novelty of bringing together Rosetta molecular  
608 modeling and MD simulations to study drug - channel interactions has the potential to enable  
609 automated virtual drug screening in the future. Critically, this approach can be applied to any ion  
610 channel, which might be used to predict individual patient responses to drug therapy based which  
611 specific ion channel mutations they have. For instance, we can predict how a single mutation in  
612 ion channel encoding gene would affect protein - drug binding and how an effect of such alteration  
613 propagates from a protein to a single cell and the cardiac rhythm of the whole organ. This work  
614 sets the stage for expansion to novel linkages by connecting mature experimental structural and  
615 functional approaches to emerging modeling approaches at the atomic and organ scales. There is  
616 potential for future simulations to be carried out to predict how functional properties of drugs can

617 be perturbed in an emergent multiscale modeling system, and these predictions may ultimately be  
618 used to inform structural models to screen drug analogs that confer the requisite functional  
619 properties predicted critical for therapy.

620

621 In particular, this study represents the first critical step for elucidating structural determinants of  
622 drug cardiac safety profiles at atomic resolution. We have observed differences in Nav1.5 binding  
623 profiles for cardiac safe lidocaine versus flecainide, a drug with a known proclivity for deadly  
624 arrhythmia. Our previous multi-scale modeling and experimental study suggested that such  
625 molecular scale differences can propagate and emerge at the tissue and organ levels as notable pro-  
626 arrhythmia markers (Moreno et al., 2011). We have also performed multi-microsecond molecular  
627 dynamic simulations to explore drug – channel binding pathways for charged and neutral forms of  
628 lidocaine, which provided a molecular picture consistent with previous experimental observations.  
629 Future work will extend these studies to flecainide and other Nav1.5 channel binders with different  
630 pro-arrhythmia proclivities.



## 631 **Materials and Methods**

632

### 633 **Rosetta modeling of the hNav<sub>v</sub>1.5 channel**

634 We used the Rosetta structural modeling software (Alford et al., 2017; Bender et al., 2016; Rohl  
635 et al., 2004) and the cryoEM structure of the Nav<sub>v</sub>1.4-beta1 complex from the electric eel  
636 (eeNav<sub>v</sub>1.4) (PDB ID: 5XSY) as a template to predict the structure of the human Nav<sub>v</sub>1.5 (hNav<sub>v</sub>1.5)  
637 channel. At first, the structure of eeNav<sub>v</sub>1.4 without the beta1 subunit was passed through the Cryo-  
638 EM refinement protocol in Rosetta (DiMaio et al., 2015). The lowest scoring density-refitted  
639 eeNav<sub>v</sub>1.4 model and electron density were then used in combination in RosettaCM (Song et al.,  
640 2013) to model the hNav<sub>v</sub>1.5 channel. We generated 5,000 structural models of hNav<sub>v</sub>1.5 and  
641 selected the top 500 lowest-scoring models for clustering analysis as described previously  
642 (Bonneau et al., 2002). Models from top clusters were visually inspected to select the final model  
643 for the docking study.

644

### 645 **RosettaLigand modeling of hNav<sub>v</sub>1.5 channel interaction with antiarrhythmic and local 646 anesthetic drugs**

647 OpenEye OMEGA (OpenEye Scientific Software) (Hawkins & Nicholls, 2012; Hawkins et al.,  
648 2010) was used to generate conformers for antiarrhythmic and local anesthetic drugs. To uniformly  
649 and efficiently sample the pore region of hNav<sub>v</sub>1.5, drugs were placed at 5 different initial locations:  
650 at the center of the cavity and at 4 fenestration sites. We incorporated an initial random perturbation  
651 with a translation distance less than 10 Å before the docking run to add another layer of  
652 randomization. Sampling radius was set to 10 Å. The details of the RosettaLigand docking  
653 algorithm have been described previously (Bender et al., 2016; Combs et al., 2013; Davis & Baker,  
654 2009; DeLuca et al., 2015; Meiler & Baker, 2006). A total of 200,000 docking models were  
655 generated for each drug. The top 10,000 models were selected based on the total score of protein-  
656 ligand complex and then ranked by ligand binding energy represented by Rosetta interface delta\_X  
657 energy term. The top 50 ligand binding energy models were visually analyzed using UCSF  
658 Chimera (Pettersen et al., 2004) and the most frequently sampled ensembles of poses are shown in  
659 Figures 2 and 3, with several representative poses demonstrated in Figure 2 and 3 Figure  
660 Supplements.

661

### 662 **Drug forcefield parameterization**

663 We obtained the molecular structure of lidocaine from the ZINC database (accession number  
664 20237), (Irwin & Shoichet, 2005), and used the CGENFF program, version 1.0 (Vanommeslaeghe  
665 & MacKerell; Vanommeslaeghe et al.) to generate initial guesses for partial atomic charges, bond  
666 lengths, bond angles, and dihedral angles.

667

668 The initial topology and parameters for charged and neutral forms lidocaine were subsequently  
669 validated and optimized using QM target data following the suggested CGENFF force field  
670 methodology (Vanommeslaeghe et al.). High-quality parameters not already present in CGENFF  
671 are assigned from existing parameters based on chemical analogy, and our optimizations focused  
672 on parameters with poor chemical analogy corresponding to a high penalty score  
673 (Vanommeslaeghe et al.). The Force Field Toolkit plugin (ffTK) (Mayne et al., 2013) for the  
674 Visual Molecular Dynamics program (VMD) (Humphrey et al., 1996) was used to generate files  
675 for quantum mechanical (QM) reference calculations and to perform parameter optimizations. QM  
676 target data for parameter optimization were obtained utilizing Møller–Plesset (MP2) and Hartree-

677 Fock (HF) electronic structure methods and the 6-31(d) basis set using the Gaussian 09 program  
678 (Frisch et al., 2009).

679  
680 MP2/6-31G(d) molecular dipole magnitude and orientation as well as scaled HF/6-31G(d)  
681 interaction energies with water were used for the optimization of partial atomic charges compatible  
682 with the CHARMM atomistic force fields (Mackerell). Internal bond and angle parameters were  
683 validated by comparison to MP2/6-31G(d) optimized geometries and scaled vibrational  
684 frequencies, and differences within 0.01 Å and 1° between QM and MM equilibrium bond and  
685 angle values were sought. Finally, the dihedral angle parameters were optimized to reproduce  
686 MP2/6-31G(d) potential energy scans for rotation around a particular bond.

687  
688 Optimized charges (**Table S1**) are in good agreement with QM target dipole values. The optimized  
689 MM dipole moments are overestimated in magnitude from QM MP2/6-31G(d) dipole moments by  
690 17% for neutral lidocaine and 16% for charged lidocaine (close to a 20% acceptable lower-end  
691 threshold, suggested for the CGENFF force field), and the MM dipole direction differed by ~1°  
692 from the QM computed direction for both charged and neutral lidocaine. The water interaction  
693 distances were all within 0.4 Å of QM target values (see **Tables S2 and S3**). The MM dipole  
694 moment for charged lidocaine (11.68 Debye) is almost three times higher than for neutral lidocaine  
695 (3.93 Debye), which agrees with respective computed QM values. Water interaction energies were  
696 also in good agreement with QM values, with root mean squared errors (RMSE) of 0.95 kcal/mol  
697 for neutral lidocaine, and 1.41 kcal/mol for charged lidocaine, respectively (**Table S4**). For neutral  
698 lidocaine, there was a high penalty score for the C2-N1-C3 bond angle, and optimization yielded  
699 a difference of 0.16° between MM and QM values. For charged lidocaine there were no high  
700 penalties for internal bond and angle parameters from the CGENFF. For neutral lidocaine, there  
701 were four high-penalty dihedral angles, and for charged lidocaine there were two high-penalty  
702 dihedral angles from the CGENFF. Dihedral optimizations resulted in great improvement over  
703 CGENFF initial guesses (illustrated in **Figure 4 – figure supplement 1 and 2**), with optimized  
704 torsional energy minima within ~2 kcal/mol of QM values. For comparison, raw CGENFF dihedral  
705 parameters with high penalties yielded QM free energy minima differences sometimes as high  
706 ~5kcal/mol.

707  
708 Final topology and parameters for neutral and charged lidocaine are provided in the Appendix.

### 709 **Drug-membrane partitioning**

710 Partitioning of charged and neutral lidocaine into a lipid membrane was assessed using the NAMD  
711 (Phillips et al., 2005) program. Initial system setup scripts were generated with the CHARMM-  
712 GUI web toolkit (Sunhwan Jo et al., 2008) and were modified to build the hydrated drug-  
713 membrane systems, which consisted of 128 1-palmitoyl-2-oleoylphosphatidylcholine (POPC)  
714 lipids, ~7000 water molecules, 21 or 22 K<sup>+</sup> and 22 Cl<sup>-</sup> ions to ensure 0.15 M electrolyte  
715 concentration and overall electrical neutrality, and one drug molecule, totaling ~38,250 atoms.  
716 CHARMM36 lipid force field (Kluda et al., 2010), TIP3P water model (Jorgensen et al., 1983),  
717 standard CHARMM ion parameters (Beglov & Roux, 1994) and CGENFF (Vanommeslaeghe et  
718 al., 2010b) compatible drug parameters developed in this work were used throughout all  
719 simulations.

720  
721

722 For partitioning calculations of each drug we used the umbrella sampling (US) method (Torrie &  
723 Valleau, 1977) with 81 independent simulation windows, placing the center of mass (COM) of a  
724 randomly oriented drug molecule in 1 Å intervals from -40 Å to 40 Å with respect to COM of the  
725 membrane. The COM of the drug was restrained along the  $z$  axis with a force constant of 2.5  
726 kcal/mol/Å<sup>2</sup>, and an additional 5 kcal/mol/Å<sup>2</sup> cylindrical restraint was applied in order to prevent  
727 the drift of the molecule in the  $xy$  plane. Each NAMD US simulation of charged and neutral  
728 lidocaine was carried out in a *NPT* ensemble with 1 atm pressure maintained by Langevin piston  
729 barostat (Feller et al., 1995), and 310K, controlled by Nosé-Hoover thermostat (Hoover, 1985;  
730 Nosé, 1984). Tetragonal cells with periodic boundary conditions (PBC) were used in all the  
731 simulations, and the SHAKE algorithm (Ryckaert et al., 1977) was employed to fix the bonds to  
732 all hydrogen atoms, allowing for the use of a 2 fs time step. Electrostatic interactions were  
733 computed via Particle Mesh Ewald (Darden et al., 1993), with a mesh grid of 1 Å.  
734 Potential of mean force (PMF) profiles were computed using the weighted histogram analysis  
735 method (WHAM) (Kumar et al., 1992). Umbrella sampling simulations for charged and neutral  
736 lidocaine were run for 15 ns per window.

737  
738 Drug-water partition coefficients were calculated as was done previously (Vorobyov et al., 2012):  
739

$$740 \quad K(\text{wat} \rightarrow \text{mem}) = \frac{1}{(z_2 - z_1)} \int_{z_1}^{z_2} e^{-\frac{W(z) - W(z_1)}{k_B T}} dz \quad (1)$$

741  
742 where  $W(z)$  is the PMF,  $z_1$  and  $z_2$  are points in aqueous solution on opposite sides of the membrane,  
743  $k_B$  is Boltzmann constant, and  $T$  is the absolute temperature.

744  
745 Error bars were estimated from PMFs by propagation of uncertainties.

746  
747 The distribution coefficient,  $D$ , was computed as

$$748 \quad D = \frac{K_0 10^{pH - pK_a} + K_1}{10^{pH - pK_a} + 1} \quad (2)$$

750  
751 Where  $K_0$  is the partition coefficient of a neutral drug form, and  $K_1$  is the partition coefficient of  
752 a charged (protonated) drug form, both computed via Equation 1.

753  
754 To compute drug translocation rates across membrane we used Kramer's transition rate  
755 approximation as was done previously (Allen et al., 2003; Crouzy et al., 1994). For charged  
756 lidocaine local diffusion near the membrane center was computed to be  $D(z_{\text{barrier}}) = 0.0047 \text{ Å}^2/\text{ps}$ ,  
757 and the curvatures of the PMF well and the PMF peak were 0.0508 and -0.207, respectively. For  
758 neutral lidocaine  $D(z_{\text{barrier}}) = 0.0089 \text{ Å}^2/\text{ps}$ , and the curvatures of the PMF well and the PMF peak  
759 were 0.0312 and -0.0784, respectively.

### 760 761 **Molecular dynamics simulations of hNav1.5 channel interaction with lidocaine**

762 The hNav1.5 model was embedded in a bilayer of POPC with explicit TIP3P water molecules and  
763 150 mM (with lidocaine) or 500 mM (without lidocaine) of NaCl using CHARMM-GUI (S. Jo et  
764 al., 2008). For lidocaine containing simulations we used physiological NaCl concentration, but we  
765 used larger salt concentration in the drug-free runs to facilitate Na<sup>+</sup> conductance. For all these

766 simulations, we also used CHARMM36 lipid (S. Lee et al., 2014) and protein (Huang &  
767 MacKerell, 2013) force fields, and CHARMM generalized force field (CGENFF) compatible  
768 parameters for lidocaine as described above. Initial system equilibrations were performed using  
769 NAMD on a local GPU cluster. After 10,000 steps of steepest descent minimization, MD  
770 simulations started with a timestep of 1 fs with harmonic restraints initially applied to protein  
771 heavy atoms and some lipid tail dihedral angles. These restraints were slowly released over 2 ns.  
772 Harmonic restraints ( $0.1 \text{ kcal/mol/\AA}^2$ ) were then applied only to protein  $C_\alpha$  atoms, and the systems  
773 were equilibrated further for 50 ns with a timestep of 2 fs. In order to use a 2 fs timestep, all bonds  
774 to H atoms were constrained using the SHAKE algorithm. All simulations were performed at  
775 constant pressure (1 atm) with constant ratio of  $x$  and  $y$  dimensions in order to maintain the correct  
776 area per lipid, and constant temperature of 303.15 K (chosen to avoid the gel phase transition of  
777 POPC lipids). Electrostatic interactions were computed using Particle Mesh Ewald (PME). Non-  
778 bonded pair lists were updated every 10 steps with a list cutoff distance of 16 Å and a real space  
779 cutoff of 12 Å with energy switching starting at 10 Å.

780  
781 Equilibrated systems were simulated on the Anton 2 supercomputer using Anton 2 software (Shaw  
782 et al., 2014) version 1.31.0 in the  $NPT$  ensemble at 303.15 K. A 2 fs timestep was used with non-  
783 bonded long-range interactions computed every 6 fs using the RESPA multiple time step  
784 algorithm. The multi-integrator (multigrator) algorithm was used for temperature and semi-  
785 isotropic pressure coupling. Long-range electrostatic interactions were handled by u-series  
786 algorithm (Shaw et al., 2014). A long-range Lennard-Jones (LJ) correction (beyond cutoff) was  
787 not used as was suggested for CHARMM36 lipid force field. For the simulation of hNav1.5  
788 without drugs, an electric field was applied downwardly in the  $z$  direction to mimic membrane  
789 potential of 250 mV (positive inside).

790  
791 For the neutral lidocaine simulations, two different systems were created with initial neutral  
792 lidocaine aqueous concentration at 75mM and 150mM. Each system was simulated for 7  $\mu\text{s}$  on  
793 Anton2.

794  
795 For the charged lidocaine simulations, systems of 1 and 2 charged lidocaine were created by  
796 initially placing 1 and 2 charged lidocaine molecules in the cavity of the hNav1.5 model. Each  
797 system was simulated for 1  $\mu\text{s}$  on Anton2.

## 798 799 **Analysis**

800 *Drug binding in the channel:* 3D density maps of the drug center of mass for the neutral lidocaine  
801 and position of the amino group for the charged one from Nav1.5 – drug flooding MD simulations  
802 were used to compute free energy profiles using equation  $W(r_i) = -k_B T \ln[\rho(r_i)] + C$  where  $\rho(r_i)$  is  
803 the unbiased probability distribution as a function of reaction coordinates  $r_i$ , and  $C$  is a constant.  
804 The maps were offset to get an average free energy of 0 kcal/mol in bulk water for neutral lidocaine  
805 or for the binding site in the pore for the charged lidocaine. 2D projections of these free energy  
806 maps on the  $Z$  (transmembrane) and  $Y$  (lateral) axes are shown in Figures 4, 5 and 6. Origin is  
807 selected as the center of mass of the protein.

808  
809 *Sodium binding in the selectivity filter (Figure 7):*  $xy$ -radial position  $\leq 15\text{\AA}$ , and  $z$ -axial position  
810 between  $-15$  and  $+15\text{\AA}$  were used to define the pore region for ion occupation.  $x$ ,  $y$  and  $z$  are  
811 defined relative to the center of mass (COM) of the backbone of the selectivity filter. Free energy

812 surfaces were calculated from unbiased simulation as  $W(r_i) = -k_B T \ln[\rho(r_i)] + C$  where  $\rho(r_i)$  is the  
813 unbiased probability distribution as a function of reaction coordinates  $r_i$ , and C is a constant. Origin  
814 is selected as the center of mass of the protein.

815

## 816 **Acknowledgements**

817

818 We would like to thank Drs. Jon Sack, Toby Allen, Heike Wulff, Kazuharu Furutani, and members  
819 of Clancy, Yarov-Yarovoy and Sack laboratories for helpful discussions. We thank Dr. Nieng Yan  
820 (Princeton University) for sharing coordinates of electric eel and human Nav1.4 channel structures.  
821 Anton 2 computer time was provided by the Pittsburgh Supercomputing Center (PSC) through  
822 Grant R01GM116961 from the National Institutes of Health. The Anton 2 machine (Shaw et al.,  
823 2014) at PSC was generously made available by D.E. Shaw Research. This research was supported  
824 by National Heart, Lung, and Blood Institute Grant U01HL126273, R01HL128537,  
825 R01HL128170 to CEC and American Heart Association Predoctoral Fellowship 16PRE27260295  
826 to KRD.

827

## 828 **References**

829

830 Ahern, C. A., Eastwood, A. L., Dougherty, D. A., & Horn, R. (2008). Electrostatic contributions  
831 of aromatic residues in the local anesthetic receptor of voltage-gated sodium channels.  
832 *Circ Res*, *102*(1), 86-94. doi:10.1161/CIRCRESAHA.107.160663

833 Alford, R. F., Leaver-Fay, A., Jeliaskov, J. R., O'Meara, M. J., DiMaio, F. P., Park, H.,  
834 Shapovalov, M. V., Renfrew, P. D., Mulligan, V. K., Kappel, K., Labonte, J. W., Pacella,  
835 M. S., Bonneau, R., Bradley, P., Dunbrack, R. L., Jr., Das, R., Baker, D., Kuhlman, B.,  
836 Kortemme, T., & Gray, J. J. (2017). The Rosetta All-Atom Energy Function for  
837 Macromolecular Modeling and Design. *J Chem Theory Comput*, *13*(6), 3031-3048.  
838 doi:10.1021/acs.jctc.7b00125

839 Allen, T. W., Andersen, O. S., & Roux, B. (2003). Structure of gramicidin a in a lipid bilayer  
840 environment determined using molecular dynamics simulations and solid-state NMR  
841 data. *J Am Chem Soc*, *125*(32), 9868-9877.

842 Anderson, J. L., Stewart, J. R., & Crevey, B. J. (1984). A proposal for the clinical use of  
843 flecainide. *Am J Cardiol*, *53*(5), 112B-119B.

844 Avdeef, A., Box, K. J., Comer, J. E., Hibbert, C., & Tam, K. Y. (1998). pH-metric logP 10.  
845 Determination of liposomal membrane-water partition coefficients of ionizable drugs.  
846 *Pharm Res*, *15*(2), 209-215.

847 Bagneris, C., DeCaen, P. G., Naylor, C. E., Pryde, D. C., Nobeli, I., Clapham, D. E., & Wallace,  
848 B. A. (2014). Prokaryotic NavMs channel as a structural and functional model for  
849 eukaryotic sodium channel antagonism. *Proc Natl Acad Sci U S A*, *111*(23), 8428-8433.  
850 doi:10.1073/pnas.1406855111

851 Balser, J. R., Nuss, H. B., Chiamvimonvat, N., Perez-Garcia, M. T., Marban, E., & Tomaselli, G.  
852 F. (1996). External pore residue mediates slow inactivation in mu 1 rat skeletal muscle  
853 sodium channels. *J Physiol*, *494* ( Pt 2), 431-442.

854 Barber, A. F., Carnevale, V., Klein, M. L., Eckenhoff, R. G., & Covarrubias, M. (2014).  
855 Modulation of a voltage-gated Na<sup>+</sup> channel by sevoflurane involves multiple sites and  
856 distinct mechanisms. *Proc Natl Acad Sci U S A*, *111*(18), 6726-6731.  
857 doi:10.1073/pnas.1405768111

- 858 Beglov, D., & Roux, B. (1994). Finite Representation of an Infinite Bulk System - Solvent  
859 Boundary Potential for Computer-Simulations. *Journal of Chemical Physics*, 100(12),  
860 9050-9063. doi:Doi 10.1063/1.466711
- 861 Bender, B. J., Cisneros, A., 3rd, Duran, A. M., Finn, J. A., Fu, D., Lokits, A. D., Mueller, B. K.,  
862 Sangha, A. K., Sauer, M. F., Sevy, A. M., Sliwoski, G., Sheehan, J. H., DiMaio, F.,  
863 Meiler, J., & Moretti, R. (2016). Protocols for Molecular Modeling with Rosetta3 and  
864 RosettaScripts. *Biochemistry*, 55(34), 4748-4763. doi:10.1021/acs.biochem.6b00444
- 865 Benhorin, J., Taub, R., Goldmit, M., Kerem, B., Kass, R. S., Windman, I., & Medina, A. (2000).  
866 Effects of flecainide in patients with new SCN5A mutation: mutation-specific therapy for  
867 long-QT syndrome? *Circulation*, 101(14), 1698-1706.
- 868 Boiteux, C., Vorobyov, I., & Allen, T. W. (2014). Ion conduction and conformational flexibility  
869 of a bacterial voltage-gated sodium channel. *Proc Natl Acad Sci U S A*, 111(9), 3454-  
870 3459. doi:10.1073/pnas.1320907111
- 871 Boiteux, C., Vorobyov, I., French, R. J., French, C., Yarov-Yarovoy, V., & Allen, T. W. (2014).  
872 Local anesthetic and antiepileptic drug access and binding to a bacterial voltage-gated  
873 sodium channel. *Proc Natl Acad Sci U S A*. doi:10.1073/pnas.1408710111
- 874 Bonneau, R., Strauss, C. E., Rohl, C. A., Chivian, D., Bradley, P., Malmstrom, L., Robertson, T.,  
875 & Baker, D. (2002). De novo prediction of three-dimensional structures for major protein  
876 families. *J Mol Biol*, 322(1), 65-78.
- 877 Buyan, A., Sun, D., & Corry, B. (2018). Protonation state of inhibitors determines interaction  
878 sites within voltage-gated sodium channels. *Proc Natl Acad Sci U S A*.  
879 doi:10.1073/pnas.1714131115
- 880 Carnevale, V. (2018). Protonation underlies tonic vs. use-dependent block. *Proc Natl Acad Sci U*  
881 *S A*. doi:10.1073/pnas.1802178115
- 882 Catterall, W. A. (2014). Structure and function of voltage-gated sodium channels at atomic  
883 resolution. *Exp Physiol*, 99(1), 35-51. doi:10.1113/expphysiol.2013.071969
- 884 Catterall, W. A., Cestele, S., Yarov-Yarovoy, V., Yu, F. H., Konoki, K., & Scheuer, T. (2007).  
885 Voltage-gated ion channels and gating modifier toxins. *Toxicon*, 49(2), 124-141.
- 886 Catterall, W. A., Goldin, A. L., & Waxman, S. G. (2005). International Union of Pharmacology.  
887 XLVII. Nomenclature and structure-function relationships of voltage-gated sodium  
888 channels. *Pharmacol Rev*, 57(4), 397-409.
- 889 Cestele, S., Yarov-Yarovoy, V., Qu, Y., Sampieri, F., Scheuer, T., & Catterall, W. A. (2006).  
890 Structure and function of the voltage sensor of sodium channels probed by a beta-  
891 scorpion toxin. *J Biol Chem*, 281(30), 21332-21344.
- 892 Chakrabarti, N., Ing, C., Payandeh, J., Zheng, N., Catterall, W. A., & Pomes, R. (2013).  
893 Catalysis of Na<sup>+</sup> permeation in the bacterial sodium channel Na(V)Ab. *Proc Natl Acad*  
894 *Sci U S A*, 110(28), 11331-11336. doi:10.1073/pnas.1309452110
- 895 Chandra, R., Chauhan, V. S., Starmer, C. F., & Grant, A. O. (1999). beta-Adrenergic action on  
896 wild-type and KPQ mutant human cardiac Na<sup>+</sup> channels: shift in gating but no change in  
897 Ca<sup>2+</sup>:Na<sup>+</sup> selectivity. *Cardiovasc Res*, 42(2), 490-502.
- 898 Chen, Z., Ong, B. H., Kambouris, N. G., Marban, E., Tomaselli, G. F., & Balsler, J. R. (2000).  
899 Lidocaine induces a slow inactivated state in rat skeletal muscle sodium channels. *J*  
900 *Physiol*, 524 Pt 1, 37-49.
- 901 Chen-Izu, Y., Shaw, R. M., Pitt, G. S., Yarov-Yarovoy, V., Sack, J. T., Abriel, H., Aldrich, R.  
902 W., Belardinelli, L., Cannell, M. B., Catterall, W. A., Chazin, W. J., Chiamvimonvat, N.,  
903 Deschenes, I., Grandi, E., Hund, T. J., Izu, L. T., Maier, L. S., Maltsev, V. A.,

- 904 Marionneau, C., Mohler, P. J., Rajamani, S., Rasmusson, R. L., Sobie, E. A., Clancy, C.  
905 E., & Bers, D. M. (2015). Na<sup>+</sup> channel function, regulation, structure, trafficking and  
906 sequestration. *J Physiol*, *593*(6), 1347-1360. doi:10.1113/jphysiol.2014.281428
- 907 Combs, S. A., Deluca, S. L., Deluca, S. H., Lemmon, G. H., Nannemann, D. P., Nguyen, E. D.,  
908 Willis, J. R., Sheehan, J. H., & Meiler, J. (2013). Small-molecule ligand docking into  
909 comparative models with Rosetta. *Nat Protoc*, *8*(7), 1277-1298.  
910 doi:10.1038/nprot.2013.074
- 911 Corry, B., Lee, S., & Ahern, C. A. (2014). Pharmacological insights and quirks of bacterial  
912 sodium channels. *Handb Exp Pharmacol*, *221*, 251-267. doi:10.1007/978-3-642-41588-  
913 3\_12
- 914 Corry, B., & Thomas, M. (2012). Mechanism of ion permeation and selectivity in a voltage gated  
915 sodium channel. *J Am Chem Soc*, *134*(3), 1840-1846. doi:10.1021/ja210020h
- 916 Crouzy, S., Woolf, T. B., & Roux, B. (1994). A molecular dynamics study of gating in  
917 dioxolane-linked gramicidin A channels. *Biophys J*, *67*(4), 1370-1386.  
918 doi:10.1016/S0006-3495(94)80618-6
- 919 Darden, Tom, York, Darrin, & Pedersen, Lee. (1993). Particle mesh Ewald: An N·log(N) method  
920 for Ewald sums in large systems. *The Journal of Chemical Physics*, *98*(12), 10089-10092.  
921 doi:10.1063/1.464397
- 922 Davis, I. W., & Baker, D. (2009). RosettaLigand docking with full ligand and receptor  
923 flexibility. *J Mol Biol*, *385*(2), 381-392.
- 924 Decaen, P. G., Yarov-Yarovoy, V., Scheuer, T., & Catterall, W. A. (2011). Gating charge  
925 interactions with the S1 segment during activation of a Na<sup>+</sup> channel voltage sensor. *Proc*  
926 *Natl Acad Sci U S A*, *108*(46), 18825-18830. doi:10.1073/pnas.1116449108
- 927 DeCaen, P. G., Yarov-Yarovoy, V., Sharp, E. M., Scheuer, T., & Catterall, W. A. (2009).  
928 Sequential formation of ion pairs during activation of a sodium channel voltage sensor.  
929 *Proc Natl Acad Sci U S A*, *106*(52), 22498-22503.
- 930 DeCaen, P. G., Yarov-Yarovoy, V., Zhao, Y., Scheuer, T., & Catterall, W. A. (2008). Disulfide  
931 locking a sodium channel voltage sensor reveals ion pair formation during activation.  
932 *Proc Natl Acad Sci U S A*, *105*(39), 15142-15147.
- 933 DeLuca, S., Khar, K., & Meiler, J. (2015). Fully Flexible Docking of Medium Sized Ligand  
934 Libraries with RosettaLigand. *PLoS One*, *10*(7), e0132508.  
935 doi:10.1371/journal.pone.0132508
- 936 DeMarco, K. R., Bekker, S., Clancy, C. E., Noskov, S. Y., & Vorobyov, I. (2018). Digging into  
937 Lipid Membrane Permeation for Cardiac Ion Channel Blocker d-Sotalol with All-Atom  
938 Simulations. *Front Pharmacol*, *9*, 26. doi:10.3389/fphar.2018.00026
- 939 DeMarco, K. R., & Clancy, C. E. (2016). Cardiac Na Channels: Structure to Function. *Curr Top*  
940 *Membr*, *78*, 287-311. doi:10.1016/bs.ctm.2016.05.001
- 941 DiMaio, F., Song, Y., Li, X., Brunner, M. J., Xu, C., Conticello, V., Egelman, E., Marlovits, T.  
942 C., Cheng, Y., & Baker, D. (2015). Atomic-accuracy models from 4.5-Å cryo-electron  
943 microscopy data with density-guided iterative local refinement. *Nat Methods*, *12*(4), 361-  
944 365. doi:10.1038/nmeth.3286
- 945 Dumaine, R., & Kirsch, G. E. (1998). Mechanism of lidocaine block of late current in long Q-T  
946 mutant Na<sup>+</sup> channels. *Am J Physiol*, *274*(2 Pt 2), H477-487.
- 947 Feller, Scott E., Zhang, Yuhong, Pastor, Richard W., & Brooks, Bernard R. (1995). Constant  
948 pressure molecular dynamics simulation: The Langevin piston method. *The Journal of*  
949 *Chemical Physics*, *103*(11), 4613-4621. doi:10.1063/1.470648

- 950 Frazier, D. T., Narahashi, T., & Yamada, M. (1970). The site of action and active form of local  
951 anesthetics. II. Experiments with quaternary compounds. *J Pharmacol Exp Ther*, *171*(1),  
952 45-51.
- 953 Fredj, S., Lindegger, N., Sampson, K. J., Carmeliet, P., & Kass, R. S. (2006). Altered Na<sup>+</sup>  
954 channels promote pause-induced spontaneous diastolic activity in long QT syndrome type  
955 3 myocytes. *Circ Res*, *99*(11), 1225-1232. doi:10.1161/01.RES.0000251305.25604.b0
- 956 Fredj, S., Sampson, K. J., Liu, H., & Kass, R. S. (2006). Molecular basis of ranolazine block of  
957 LQT-3 mutant sodium channels: evidence for site of action. *Br J Pharmacol*, *148*(1), 16-  
958 24. doi:10.1038/sj.bjp.0706709
- 959 Frisch, MJ, Trucks, GW, Schlegel, HB, Scuseria, GE, Robb, MA, Cheeseman, JR, Scalmani, G,  
960 Barone, V, Mennucci, B, & Petersson, GA. (2009). Gaussian 09. Wallingford, CT:  
961 Gaussian: Inc.
- 962 Fukuda, K., Nakajima, T., Viswanathan, P. C., & Balsler, J. R. (2005). Compound-specific Na<sup>+</sup>  
963 channel pore conformational changes induced by local anaesthetics. *J Physiol*, *564*(Pt 1),  
964 21-31. doi:10.1113/jphysiol.2004.081646
- 965 Gupta, K., Zamanian, M., Bae, C., Milescu, M., Krepkiy, D., Tilley, D. C., Sack, J. T., Yarov-  
966 Yarovoy, V., Kim, J. I., & Swartz, K. J. (2015). Tarantula toxins use common surfaces  
967 for interacting with Kv and ASIC ion channels. *Elife*, *4*, e06774. doi:10.7554/eLife.06774
- 968 Hawkins, P. C., & Nicholls, A. (2012). Conformer generation with OMEGA: learning from the  
969 data set and the analysis of failures. *J Chem Inf Model*, *52*(11), 2919-2936.  
970 doi:10.1021/ci300314k
- 971 Hawkins, P. C., Skillman, A. G., Warren, G. L., Ellingson, B. A., & Stahl, M. T. (2010).  
972 Conformer generation with OMEGA: algorithm and validation using high quality  
973 structures from the Protein Databank and Cambridge Structural Database. *J Chem Inf*  
974 *Model*, *50*(4), 572-584. doi:10.1021/ci100031x
- 975 Hilber, K., Sandtner, W., Zarrabi, T., Zebedin, E., Kudlacek, O., Fozzard, H. A., & Todt, H.  
976 (2005). Selectivity filter residues contribute unequally to pore stabilization in voltage-  
977 gated sodium channels. *Biochemistry*, *44*(42), 13874-13882.
- 978 Hille, B. (1977). Local anesthetics: hydrophilic and hydrophobic pathways for the drug-receptor  
979 reaction. *J Gen Physiol*, *69*(4), 497-515.
- 980 Hille, B. (2001). *Ion Channels of Excitable Membranes* (3rd ed.): Sinauer Associates,  
981 Sunderland, MA).
- 982 Holmes, B., & Heel, R. C. (1985). Flecainide. A preliminary review of its pharmacodynamic  
983 properties and therapeutic efficacy. *Drugs*, *29*(1), 1-33.
- 984 Hondeghem, L. M., & Katzung, B. G. (1977). Time- and voltage-dependent interactions of  
985 antiarrhythmic drugs with cardiac sodium channels. *Biochim Biophys Acta*, *472*(3-4),  
986 373-398.
- 987 Hoover, William G. (1985). Canonical dynamics: Equilibrium phase-space distributions.  
988 *Physical Review A*, *31*(3), 1695-1697.
- 989 Huang, J., & MacKerell, A. D., Jr. (2013). CHARMM36 all-atom additive protein force field:  
990 validation based on comparison to NMR data. *J Comput Chem*, *34*(25), 2135-2145.  
991 doi:10.1002/jcc.23354
- 992 Hummer, G. (2005). Position-dependent diffusion coefficients and free energies from Bayesian  
993 analysis of equilibrium and replica molecular dynamics simulations. *New Journal of*  
994 *Physics*, *7*, 34-34.



- 995 Humphrey, W., Dalke, A., & Schulten, K. (1996). VMD: visual molecular dynamics. *J Mol*  
996 *Graph*, 14(1), 33-38, 27-38.
- 997 Irwin, J. J., & Shoichet, B. K. (2005). ZINC--a free database of commercially available  
998 compounds for virtual screening. *J Chem Inf Model*, 45(1), 177-182.  
999 doi:10.1021/ci049714+
- 1000 Jo, S., Kim, T., Iyer, V. G., & Im, W. (2008). CHARMM-GUI: a web-based graphical user  
1001 interface for CHARMM. *J Comput Chem*, 29(11), 1859-1865. doi:10.1002/jcc.20945
- 1002 Jo, Sunhwan, Kim, Taehoon, Iyer, Vidyashankara G., & Im, Wonpil. (2008). CHARMM-GUI: A  
1003 web-based graphical user interface for CHARMM. *Journal of Computational Chemistry*,  
1004 29(11), 1859-1865. doi:10.1002/jcc.20945
- 1005 Jorgensen, W. L., Chandrasekhar, J., Madura, J. D., Impey, R. W., & Klein, M. L. (1983).  
1006 Comparison of Simple Potential Functions for Simulating Liquid Water. *Journal of*  
1007 *Chemical Physics*, 79(2), 926-935. doi:10.1063/1.445869
- 1008 Kambouris, N. G., Hastings, L. A., Stepanovic, S., Marban, E., Tomaselli, G. F., & Balsler, J. R.  
1009 (1998). Mechanistic link between lidocaine block and inactivation probed by outer pore  
1010 mutations in the rat micro1 skeletal muscle sodium channel. *J Physiol*, 512 ( Pt 3), 693-  
1011 705.
- 1012 Kimball, I. H., Nguyen, P. T., Sack, J. T., & Yarov-Yarovoy, V. (2016). Mapping the Nav1.7  
1013 Channel Interaction with the Conotoxin KIIIA. *Biophysical Journal*, 110(3), 437a-437a.  
1014 doi:10.1016/j.bpj.2015.11.2358
- 1015 Kimball, I. H., Nguyen, P. T., Sack, J. T., & Yarov-Yarovoy, V. (2018). Assessing the Structural  
1016 Basis of mu-Conotoxin KIIIA Inhibition of the Voltage-Gated Sodium Channel Nav1.7.  
1017 *Biophysical Journal*, 114(3), 635a-635a.
- 1018 Kimball, I. H., Nguyen, P. T., Yam, J., Pressly, B., York, R., Sack, J. T., & Yarov-Yarovoy, V.  
1019 (2017). Tarantula Toxin SGTx-1 alters Gating Kinetics of Human Voltage-Gated Sodium  
1020 Channel Nav1.7. *Biophysical Journal*, 112(3), 240a-240a. doi:10.1016/j.bpj.2016.11.1316
- 1021 Klauda, J. B., Venable, R. M., Freites, J. A., O'Connor, J. W., Tobias, D. J., Mondragon-  
1022 Ramirez, C., Vorobyov, I., MacKerell, A. D., Jr., & Pastor, R. W. (2010). Update of the  
1023 CHARMM all-atom additive force field for lipids: validation on six lipid types. *J Phys*  
1024 *Chem B*, 114(23), 7830-7843. doi:10.1021/jp101759q
- 1025 Koehl, P., & Levitt, M. (1999). A brighter future for protein structure prediction. *Nat Struct Biol*,  
1026 6(2), 108-111. doi:10.1038/5794
- 1027 Kumar, Shankar, Rosenberg, John M., Bouzida, Djamel, Swendsen, Robert H., & Kollman, Peter  
1028 A. (1992). THE weighted histogram analysis method for free-energy calculations on  
1029 biomolecules. I. The method. *Journal of Computational Chemistry*, 13(8), 1011-1021.  
1030 doi:10.1002/jcc.540130812
- 1031 Lee, P. J., Sunami, A., & Fozzard, H. A. (2001). Cardiac-specific external paths for lidocaine,  
1032 defined by isoform-specific residues, accelerate recovery from use-dependent block. *Circ*  
1033 *Res*, 89(11), 1014-1021.
- 1034 Lee, S., Tran, A., Allsopp, M., Lim, J. B., Henin, J., & Klauda, J. B. (2014). CHARMM36 united  
1035 atom chain model for lipids and surfactants. *J Phys Chem B*, 118(2), 547-556.  
1036 doi:10.1021/jp410344g
- 1037 Lemmon, G., & Meiler, J. (2012). Rosetta Ligand docking with flexible XML protocols.  
1038 *Methods Mol Biol*, 819, 143-155. doi:10.1007/978-1-61779-465-0\_10
- 1039

- 1040 Lenaeus, M. J., Gamal El-Din, T. M., Ing, C., Ramanadane, K., Pomes, R., Zheng, N., &  
1041 Catterall, W. A. (2017). Structures of closed and open states of a voltage-gated sodium  
1042 channel. *Proc Natl Acad Sci U S A*, *114*(15), E3051-E3060.  
1043 doi:10.1073/pnas.1700761114
- 1044 Leuwer, M., Haeseler, G., Hecker, H., Bufler, J., Dengler, R., & Aronson, J. K. (2004). An  
1045 improved model for the binding of lidocaine and structurally related local anaesthetics to  
1046 fast-inactivated voltage-operated sodium channels, showing evidence of cooperativity. *Br*  
1047 *J Pharmacol*, *141*(1), 47-54. doi:10.1038/sj.bjp.0705594
- 1048 Liu, H., Atkins, J., & Kass, R. S. (2003). Common molecular determinants of flecainide and  
1049 lidocaine block of heart Na<sup>+</sup> channels: evidence from experiments with neutral and  
1050 quaternary flecainide analogues. *J Gen Physiol*, *121*(3), 199-214.
- 1051 Liu, H., Tateyama, M., Clancy, C. E., Abriel, H., & Kass, R. S. (2002). Channel openings are  
1052 necessary but not sufficient for use-dependent block of cardiac Na<sup>(+)</sup> channels by  
1053 flecainide: evidence from the analysis of disease-linked mutations. *J Gen Physiol*, *120*(1),  
1054 39-51.
- 1055 Mackerell, A. D., Jr. (2004). Empirical force fields for biological macromolecules: overview and  
1056 issues. *J Comput Chem*, *25*(13), 1584-1604. doi:10.1002/jcc.20082
- 1057 Marti-Renom, M. A., Stuart, A. C., Fiser, A., Sanchez, R., Melo, F., & Sali, A. (2000).  
1058 Comparative protein structure modeling of genes and genomes. *Annu Rev Biophys*  
1059 *Biomol Struct*, *29*, 291-325.
- 1060 Martin, L. J., Chao, R., & Corry, B. (2014). Molecular dynamics simulation of the partitioning of  
1061 benzocaine and phenytoin into a lipid bilayer. *Biophys Chem*, *185*, 98-107.  
1062 doi:10.1016/j.bpc.2013.12.003
- 1063 Martin, L. J., & Corry, B. (2014). Locating the route of entry and binding sites of benzocaine and  
1064 phenytoin in a bacterial voltage gated sodium channel. *PLoS Comput Biol*, *10*(7),  
1065 e1003688. doi:10.1371/journal.pcbi.1003688
- 1066 Mayne, C. G., Saam, J., Schulten, K., Tajkhorshid, E., & Gumbart, J. C. (2013). Rapid  
1067 parameterization of small molecules using the Force Field Toolkit. *J Comput Chem*,  
1068 *34*(32), 2757-2770. doi:10.1002/jcc.23422
- 1069 Meiler, J., & Baker, D. (2006). ROSETTALIGAND: protein-small molecule docking with full  
1070 side-chain flexibility. *Proteins*, *65*(3), 538-548.
- 1071 Moreno, J. D., Zhu, Z. I., Yang, P. C., Bankston, J. R., Jeng, M. T., Kang, C., Wang, L., Bayer, J.  
1072 D., Christini, D. J., Trayanova, N. A., Ripplinger, C. M., Kass, R. S., & Clancy, C. E.  
1073 (2011). A computational model to predict the effects of class I anti-arrhythmic drugs on  
1074 ventricular rhythms. *Sci Transl Med*, *3*(98), 98ra83. doi:3/98/98ra83 [pii]  
1075 [10.1126/scitranslmed.3002588](https://doi.org/10.1126/scitranslmed.3002588)
- 1076 Muroi, Y., & Chanda, B. (2009). Local anesthetics disrupt energetic coupling between the  
1077 voltage-sensing segments of a sodium channel. *J Gen Physiol*, *133*(1), 1-15.  
1078 doi:10.1085/jgp.200810103
- 1079 Narahashi, T., Frazier, T., & Yamada, M. (1970). The site of action and active form of local  
1080 anesthetics. I. Theory and pH experiments with tertiary compounds. *J Pharmacol Exp*  
1081 *Ther*, *171*(1), 32-44.
- 1082 Nau, C., Wang, S. Y., & Wang, G. K. (2003). Point mutations at L1280 in Nav1.4 channel D3-  
1083 S6 modulate binding affinity and stereoselectivity of bupivacaine enantiomers. *Mol*  
1084 *Pharmacol*, *63*(6), 1398-1406. doi:10.1124/mol.63.6.1398

- 1085 Nguyen, H. M., Singh, V., Pressly, B., Jenkins, D. P., Wulff, H., & Yarov-Yarovoy, V. (2017).  
1086 Structural Insights into the Atomistic Mechanisms of Action of Small Molecule  
1087 Inhibitors Targeting the KCa3.1 Channel Pore. *Mol Pharmacol*, *91*(4), 392-402.  
1088 doi:10.1124/mol.116.108068
- 1089 Nguyen, P. T., DeMarco, K. R., Vorobyov, I., Clancy, C. E., & Yarov-Yarovoy, V. (2018).  
1090 Structural Modeling of Local Anesthetic and Antiarrhythmic Drug Binding to the Human  
1091 Cardiac Voltage Gated Sodium Channel. *Biophysical Journal*, *114*(3), 39a-39a.
- 1092 Nguyen, P. T., Kimball, I. H., Eum, K. S., Cohen, B. E., Sack, J. T., & Yarov-Yarovoy, V.  
1093 (2015). Understanding the State Dependence of Voltage Sensor Toxin Action on Voltage  
1094 Gated Sodium Channels. *Biophysical Journal*, *108*(2), 574a-574a. doi:DOI  
1095 10.1016/j.bpj.2014.11.3139
- 1096 Nguyen, P.T., DeMarco, K.R., Vorobyov, I., Clancy, C.E., Allen, T.W., & Yarov-Yarovoy, V.  
1097 (2017). An Open State Model of the Navab Channel Explored by Rosetta and Molecular  
1098 Dynamics Simulation. *Biophys J*, *112*(3), 105a.
- 1099 Nguyen, P.T., Sack, J.T., Allen, T.W., & Yarov-Yarovoy, V. (2014). Structural Modeling of  
1100 Toxin Interactions with the Human Voltage-Gated Sodium Channel Pore. *Biophys J*,  
1101 *106*(2), 130a  
1102 .
- 1103 Nosé, Shuichi. (1984). A unified formulation of the constant temperature molecular dynamics  
1104 methods. *The Journal of Chemical Physics*, *81*(1), 511-519. doi:10.1063/1.447334
- 1105 O'Leary, M. E., & Chahine, M. (2018). Mechanisms of Drug Binding to Voltage-Gated Sodium  
1106 Channels. *Handb Exp Pharmacol*, *246*, 209-231. doi:10.1007/164\_2017\_73
- 1107 Ong, B. H., Tomaselli, G. F., & Balsler, J. R. (2000). A structural rearrangement in the sodium  
1108 channel pore linked to slow inactivation and use dependence. *J Gen Physiol*, *116*(5), 653-  
1109 662.
- 1110 Pan, X., Li, Z., Zhou, Q., Shen, H., Wu, K., Huang, X., Chen, J., Zhang, J., Zhu, X., Lei, J.,  
1111 Xiong, W., Gong, H., Xiao, B., & Yan, N. (2018). Structure of the human voltage-gated  
1112 sodium channel Nav1.4 in complex with beta1. *Science*. doi:10.1126/science.aau2486
- 1113 Pathak, M. M., Yarov-Yarovoy, V., Agarwal, G., Roux, B., Barth, P., Kohout, S., Tombola, F.,  
1114 & Isacoff, E. Y. (2007). Closing in on the resting state of the shaker k(+) channel.  
1115 *Neuron*, *56*(1), 124-140.
- 1116 Payandeh, J., Gamal El-Din, T. M., Scheuer, T., Zheng, N., & Catterall, W. A. (2012). Crystal  
1117 structure of a voltage-gated sodium channel in two potentially inactivated states. *Nature*,  
1118 *486*(7401), 135-139. doi:10.1038/nature11077
- 1119 Payandeh, J., Scheuer, T., Zheng, N., & Catterall, W. A. (2011). The crystal structure of a  
1120 voltage-gated sodium channel. *Nature*, *475*(7356), 353-358. doi:10.1038/nature10238
- 1121 Perez-Garcia, M. T., Chiamvimonvat, N., Ranjan, R., Balsler, J. R., Tomaselli, G. F., & Marban,  
1122 E. (1997). Mechanisms of sodium/calcium selectivity in sodium channels probed by  
1123 cysteine mutagenesis and sulfhydryl modification. *Biophys J*, *72*(3), 989-996.
- 1124 Pettersen, E. F., Goddard, T. D., Huang, C. C., Couch, G. S., Greenblatt, D. M., Meng, E. C., &  
1125 Ferrin, T. E. (2004). UCSF Chimera--a visualization system for exploratory research and  
1126 analysis. *J Comput Chem*, *25*(13), 1605-1612.
- 1127 Phillips, James C., Braun, Rosemary, Wang, Wei, Gumbart, James, Tajkhorshid, Emad, Villa,  
1128 Elizabeth, Chipot, Christophe, Skeel, Robert D., Kalé, Laxmikant, & Schulten, Klaus.  
1129 (2005). Scalable molecular dynamics with NAMD. *Journal of Computational Chemistry*,  
1130 *26*(16), 1781-1802. doi:10.1002/jcc.20289

- 1131 Pless, S. A., Galpin, J. D., Frankel, A., & Ahern, C. A. (2011). Molecular basis for class Ib anti-  
1132 arrhythmic inhibition of cardiac sodium channels. *Nat Commun*, 2, 351.  
1133 doi:10.1038/ncomms1351
- 1134 Preliminary report: effect of encainide and flecainide on mortality in a randomized trial of  
1135 arrhythmia suppression after myocardial infarction. The Cardiac Arrhythmia Suppression  
1136 Trial (CAST) Investigators. (1989). *N Engl J Med*, 321(6), 406-412.
- 1137 Qu, Y., Rogers, J., Tanada, T., Scheuer, T., & Catterall, W. A. (1995). Molecular determinants of  
1138 drug access to the receptor site for antiarrhythmic drugs in the cardiac Na<sup>+</sup> channel. *Proc*  
1139 *Natl Acad Sci U S A*, 92(25), 11839-11843.
- 1140 Ragsdale, D. S., McPhee, J. C., Scheuer, T., & Catterall, W. A. (1994). Molecular determinants  
1141 of state-dependent block of Na<sup>+</sup> channels by local anesthetics. *Science*, 265(5179), 1724-  
1142 1728.
- 1143 Ragsdale, D. S., McPhee, J. C., Scheuer, T., & Catterall, W. A. (1996). Common molecular  
1144 determinants of local anesthetic, antiarrhythmic, and anticonvulsant block of voltage-  
1145 gated Na<sup>+</sup> channels. *Proc Natl Acad Sci U S A*, 93(17), 9270-9275.
- 1146 Reiz, S., & Nath, S. (1986). Cardiotoxicity of local anaesthetic agents. *Br J Anaesth*, 58(7), 736-  
1147 746.
- 1148 Rohl, C. A., Boeckman, F. A., Baker, C., Scheuer, T., Catterall, W. A., & Klevit, R. E. (1999).  
1149 Solution structure of the sodium channel inactivation gate. *Biochemistry*, 38(3), 855-861.
- 1150 Rohl, C. A., Strauss, C. E., Misura, K. M., & Baker, D. (2004). Protein structure prediction using  
1151 Rosetta. *Methods Enzymol*, 383, 66-93.
- 1152 Ryckaert, Jean-Paul, Ciccotti, Giovanni, & Berendsen, Herman J. C. (1977). Numerical  
1153 integration of the cartesian equations of motion of a system with constraints: molecular  
1154 dynamics of n-alkanes. *Journal of Computational Physics*, 23(3), 327-341.  
1155 doi:[http://dx.doi.org/10.1016/0021-9991\(77\)90098-5](http://dx.doi.org/10.1016/0021-9991(77)90098-5)
- 1156 Shaw, D. E., Grossman, J. P., Bank, J. A., Batson, B., Butts, J. A., Chao, J. C., Deneroff, M. M.,  
1157 Dror, R. O., Even, A., Fenton, C. H., Forte, A., Gagliardo, J., Gill, G., Greskamp, B., Ho,  
1158 C. R., Ierardi, D. J., Iserovich, L., Kuskin, J. S., Larson, R. H., Layman, T., Lee, L. S.,  
1159 Lerer, A. K., Li, C., Killebrew, D., Mackenzie, K. M., Mok, S. Y. H., Moraes, M. A.,  
1160 Mueller, R., Nociolo, L. J., Petricolas, J. L., Quan, T., Ramot, D., Salmon, J. K.,  
1161 Scarpazza, D. P., Ben Schafer, U., Siddique, N., Snyder, C. W., Spengler, J., Tang, P. T.  
1162 P., Theobald, M., Toma, H., Towles, B., Vitale, B., Wang, S. C., & Young, C. (2014).  
1163 Anton 2: Raising the bar for performance and programmability in a special-purpose  
1164 molecular dynamics supercomputer. *Sc14: International Conference for High*  
1165 *Performance Computing, Networking, Storage and Analysis*, 41-53.  
1166 doi:10.1109/Sc.2014.9
- 1167 Shen, H., Li, Z., Jiang, Y., Pan, X., Wu, J., Cristofori-Armstrong, B., Smith, J. J., Chin, Y. K. Y.,  
1168 Lei, J., Zhou, Q., King, G. F., & Yan, N. (2018). Structural basis for the modulation of  
1169 voltage-gated sodium channels by animal toxins. *Science*. doi:10.1126/science.aau2596
- 1170 Shen, H., Zhou, Q., Pan, X., Li, Z., Wu, J., & Yan, N. (2017). Structure of a eukaryotic voltage-  
1171 gated sodium channel at near-atomic resolution. *Science*, 355(6328).  
1172 doi:10.1126/science.aal4326
- 1173 Simons, K. T., Ruczinski, I., Kooperberg, C., Fox, B. A., Bystroff, C., & Baker, D. (1999).  
1174 Improved recognition of native-like protein structures using a combination of sequence-  
1175 dependent and sequence-independent features of proteins. *Proteins*, 34(1), 82-95.

- 1176 Singh, B. N. (1997). Acute management of ventricular arrhythmias: role of antiarrhythmic  
1177 agents. *Pharmacotherapy*, 17(2 Pt 2), 56S-64S; discussion 89S-91S.
- 1178 Smith, J. A., Amagasu, S. M., Hembrador, J., Axt, S., Chang, R., Church, T., Gee, C., Jacobsen,  
1179 J. R., Jenkins, T., Kaufman, E., Mai, N., & Vickery, R. G. (2006). Evidence for a  
1180 multivalent interaction of symmetrical, N-linked, lidocaine dimers with voltage-gated  
1181 Na<sup>+</sup> channels. *Mol Pharmacol*, 69(3), 921-931. doi:10.1124/mol.105.019257
- 1182 Song, Y., DiMaio, F., Wang, R. Y., Kim, D., Miles, C., Brunette, T., Thompson, J., & Baker, D.  
1183 (2013). High-resolution comparative modeling with RosettaCM. *Structure*, 21(10), 1735-  
1184 1742. doi:10.1016/j.str.2013.08.005
- 1185 Starmer, C. F., Grant, A. O., & Strauss, H. C. (1984). Mechanisms of use-dependent block of  
1186 sodium channels in excitable membranes by local anesthetics. *Biophys J*, 46(1), 15-27.  
1187 doi:10.1016/S0006-3495(84)83994-6
- 1188 Strichartz, G. R. (1973). The inhibition of sodium currents in myelinated nerve by quaternary  
1189 derivatives of lidocaine. *J Gen Physiol*, 62(1), 37-57.
- 1190 Sunami, A., Dudley, S. C., Jr., & Fozzard, H. A. (1997). Sodium channel selectivity filter  
1191 regulates antiarrhythmic drug binding. *Proc Natl Acad Sci U S A*, 94(25), 14126-14131.
- 1192 Sunami, A., Glaaser, I. W., & Fozzard, H. A. (2000). A critical residue for isoform difference in  
1193 tetrodotoxin affinity is a molecular determinant of the external access path for local  
1194 anesthetics in the cardiac sodium channel. *Proc Natl Acad Sci U S A*, 97(5), 2326-2331.
- 1195 Sunami, A., Glaaser, I. W., & Fozzard, H. A. (2001). Structural and gating changes of the  
1196 sodium channel induced by mutation of a residue in the upper third of IVS6, creating an  
1197 external access path for local anesthetics. *Mol Pharmacol*, 59(4), 684-691.
- 1198 Tang, C., Zhou, X., Nguyen, P. T., Zhang, Y. X., Hu, Z. T., Zhang, C. X., Yarov-Yarovoy, V.,  
1199 DeCaen, P. G., Liang, S. P., & Liu, Z. H. (2017). A novel tarantula toxin stabilizes the  
1200 deactivated voltage sensor of bacterial sodium channel. *Faseb Journal*, 31(7), 3167-3178.  
1201 doi:10.1096/fj.201600882R
- 1202 Tang, L., Gamal El-Din, T. M., Swanson, T. M., Pryde, D. C., Scheuer, T., Zheng, N., &  
1203 Catterall, W. A. (2016). Structural basis for inhibition of a voltage-gated Ca(2<sup>+</sup>) channel  
1204 by Ca(2<sup>+</sup>) antagonist drugs. *Nature*, 537(7618), 117-121. doi:10.1038/nature19102
- 1205 Tikhonov, D. B., & Zhorov, B. S. (2017). Mechanism of sodium channel block by local  
1206 anesthetics, antiarrhythmics, and anticonvulsants. *J Gen Physiol*, 149(4), 465-481.  
1207 doi:10.1085/jgp.201611668
- 1208 Tilley, D. C., Eum, K. S., Fletcher-Taylor, S., Austin, D. C., Dupre, C., Patron, L. A., Garcia, R.  
1209 L., Lam, K., Yarov-Yarovoy, V., Cohen, B. E., & Sack, J. T. (2014). Chemoselective  
1210 tarantula toxins report voltage activation of wild-type ion channels in live cells. *Proc Natl*  
1211 *Acad Sci U S A*, 111(44), E4789-4796. doi:10.1073/pnas.1406876111
- 1212 Todt, H., Dudley, S. C., Jr., Kyle, J. W., French, R. J., & Fozzard, H. A. (1999). Ultra-slow  
1213 inactivation in mu1 Na<sup>+</sup> channels is produced by a structural rearrangement of the outer  
1214 vestibule. *Biophys J*, 76(3), 1335-1345.
- 1215 Torrie, G. M., & Valleau, J. P. (1977). Nonphysical sampling distributions in Monte Carlo free-  
1216 energy estimation: Umbrella sampling. *Journal of Computational Physics*, 23(2), 187-  
1217 199. doi:[http://dx.doi.org/10.1016/0021-9991\(77\)90121-8](http://dx.doi.org/10.1016/0021-9991(77)90121-8)
- 1218 Tsang, S. Y., Tsushima, R. G., Tomaselli, G. F., Li, R. A., & Backx, P. H. (2005). A  
1219 multifunctional aromatic residue in the external pore vestibule of Na<sup>+</sup> channels  
1220 contributes to the local anesthetic receptor. *Mol Pharmacol*, 67(2), 424-434.  
1221 doi:10.1124/mol.67.2.

- 1222 Tuluc, P., Yarov-Yarovoy, V., Benedetti, B., & Flucher, B. E. (2016). Molecular Interactions in  
1223 the Voltage Sensor Controlling Gating Properties of CaV Calcium Channels. *Structure*,  
1224 24(2), 261-271. doi:10.1016/j.str.2015.11.011
- 1225 Vanommeslaeghe, K., Hatcher, E., Acharya, C., Kundu, S., Zhong, S., Shim, J., Darian, E.,  
1226 Guvench, O., Lopes, P., Vorobyov, I., & MacKerell, A. D. (2010a). CHARMM General  
1227 Force Field: A Force Field for Drug-Like Molecules Compatible with the CHARMM  
1228 All-Atom Additive Biological Force Fields. *Journal of Computational Chemistry*, 31(4),  
1229 671-690. doi:10.1002/jcc.21367
- 1230 Vanommeslaeghe, K., Hatcher, E., Acharya, C., Kundu, S., Zhong, S., Shim, J., Darian, E.,  
1231 Guvench, O., Lopes, P., Vorobyov, I., & Mackerell, A. D., Jr. (2010b). CHARMM  
1232 general force field: A force field for drug-like molecules compatible with the CHARMM  
1233 all-atom additive biological force fields. *J Comput Chem*, 31(4), 671-690.  
1234 doi:10.1002/jcc.21367
- 1235 Vanommeslaeghe, K., & MacKerell, A. D. (2012). Automation of the CHARMM General Force  
1236 Field (CGenFF) I: Bond Perception and Atom Typing. *J Chem Inf Model*, 52(12), 3144-  
1237 3154. doi:10.1021/ci300363c
- 1238 Vanommeslaeghe, K., Raman, E. P., & MacKerell, A. D. (2012). Automation of the CHARMM  
1239 General Force Field (CGenFF) II: Assignment of Bonded Parameters and Partial Atomic  
1240 Charges. *J Chem Inf Model*, 52(12), 3155-3168. doi:10.1021/ci3003649
- 1241 Vargas, E., Yarov-Yarovoy, V., Khalili-Araghi, F., Catterall, W. A., Klein, M. L., Tarek, M.,  
1242 Lindahl, E., Schulten, K., Perozo, E., Bezanilla, F., & Roux, B. (2012). An emerging  
1243 consensus on voltage-dependent gating from computational modeling and molecular  
1244 dynamics simulations. *J Gen Physiol*, 140(6), 587-594. doi:10.1085/jgp.201210873
- 1245 Vassilev, P. M., Scheuer, T., & Catterall, W. A. (1988). Identification of an intracellular peptide  
1246 segment involved in sodium channel inactivation. *Science*, 241(4873), 1658-1661.
- 1247 Vorobyov, I., Bennett, W. F., Tieleman, D. P., Allen, T. W., & Noskov, S. (2012). The Role of  
1248 Atomic Polarization in the Thermodynamics of Chloroform Partitioning to Lipid  
1249 Bilayers. *J Chem Theory Comput*, 8(2), 618-628. doi:10.1021/ct200417p
- 1250 Waldo, A. L., Camm, A. J., deRuyter, H., Friedman, P. L., MacNeil, D. J., Pauls, J. F., Pitt, B.,  
1251 Pratt, C. M., Schwartz, P. J., & Veltri, E. P. (1996). Effect of d-sotalol on mortality in  
1252 patients with left ventricular dysfunction after recent and remote myocardial infarction.  
1253 The SWORD Investigators. Survival With Oral d-Sotalol. *Lancet*, 348(9019), 7-12.  
1254 doi:S0140673696021496 [pii]
- 1255 Wang, G. K., Calderon, J., & Wang, S. Y. (2008). State- and use-dependent block of muscle  
1256 Nav1.4 and neuronal Nav1.7 voltage-gated Na<sup>+</sup> channel isoforms by ranolazine. *Mol*  
1257 *Pharmacol*, 73(3), 940-948. doi:10.1124/mol.107.041541
- 1258 Wang, G. K., Russell, C., & Wang, S. Y. (2003). State-dependent block of wild-type and  
1259 inactivation-deficient Na<sup>+</sup> channels by flecainide. *J Gen Physiol*, 122(3), 365-374.  
1260 doi:10.1085/jgp.200308857
- 1261 Wang, J., Yarov-Yarovoy, V., Kahn, R., Gordon, D., Gurevitz, M., Scheuer, T., & Catterall, W.  
1262 A. (2011). Mapping the receptor site for {alpha}-scorpion toxins on a Na<sup>+</sup> channel  
1263 voltage sensor. *Proc Natl Acad Sci U S A*, 108(37), 15426-15431.  
1264 doi:10.1073/pnas.1112320108
- 1265 Weizenmann, N., Huster, D., & Scheidt, H. A. (2012). Interaction of local anesthetics with lipid  
1266 bilayers investigated by (1)H MAS NMR spectroscopy. *Biochim Biophys Acta*, 1818(12),  
1267 3010-3018. doi:10.1016/j.bbamem.2012.07.014

- 1268 West, J. W., Patton, D. E., Scheuer, T., Wang, Y., Goldin, A. L., & Catterall, W. A. (1992). A  
1269 cluster of hydrophobic amino acid residues required for fast Na<sup>(+)</sup>-channel inactivation.  
1270 *Proc Natl Acad Sci U S A*, *89*(22), 10910-10914.
- 1271 Yan, Z., Zhou, Q., Wang, L., Wu, J., Zhao, Y., Huang, G., Peng, W., Shen, H., Lei, J., & Yan, N.  
1272 (2017). Structure of the Nav1.4-beta1 Complex from Electric Eel. *Cell*, *170*(3), 470-482  
1273 e411. doi:10.1016/j.cell.2017.06.039
- 1274 Yang, F., Vu, S., Yarov-Yarovoy, V., & Zheng, J. (2016). Rational design and validation of a  
1275 vanilloid-sensitive TRPV2 ion channel. *Proc Natl Acad Sci U S A*, *113*(26), E3657-3666.  
1276 doi:10.1073/pnas.1604180113
- 1277 Yang, F., Xiao, X., Cheng, W., Yang, W., Yu, P., Song, Z., Yarov-Yarovoy, V., & Zheng, J.  
1278 (2015). Structural mechanism underlying capsaicin binding and activation of the TRPV1  
1279 ion channel. *Nat Chem Biol*, *11*(7), 518-524. doi:10.1038/nchembio.1835
- 1280 Yang, F., Xiao, X., Lee, B. H., Vu, S., Yang, W., Yarov-Yarovoy, V., & Zheng, J. (2018). The  
1281 conformational wave in capsaicin activation of transient receptor potential vanilloid 1 ion  
1282 channel. *Nat Commun*, *9*(1), 2879. doi:10.1038/s41467-018-05339-6
- 1283 Yang, S., Yang, F., Wei, N., Hong, J., Li, B., Luo, L., Rong, M., Yarov-Yarovoy, V., Zheng, J.,  
1284 Wang, K., & Lai, R. (2015). A pain-inducing centipede toxin targets the heat activation  
1285 machinery of nociceptor TRPV1. *Nat Commun*, *6*, 8297. doi:10.1038/ncomms9297
- 1286 Yarov-Yarovoy, V., Baker, D., & Catterall, W. A. (2006). Voltage sensor conformations in the  
1287 open and closed states in ROSETTA structural models of K<sup>(+)</sup> channels. *Proc Natl Acad  
1288 Sci U S A*, *103*(19), 7292-7297.
- 1289 Yarov-Yarovoy, V., Brown, J., Sharp, E. M., Clare, J. J., Scheuer, T., & Catterall, W. A. (2001).  
1290 Molecular determinants of voltage-dependent gating and binding of pore-blocking drugs  
1291 in transmembrane segment IIIS6 of the Na<sup>(+)</sup> channel alpha subunit. *J Biol Chem*,  
1292 *276*(1), 20-27.
- 1293 Yarov-Yarovoy, V., Decaen, P. G., Westenbroek, R. E., Pan, C. Y., Scheuer, T., Baker, D., &  
1294 Catterall, W. A. (2012). Structural basis for gating charge movement in the voltage  
1295 sensor of a sodium channel. *Proc Natl Acad Sci U S A*, *109*(2), E93-E102.  
1296 doi:10.1073/pnas.1118434109
- 1297 Yarov-Yarovoy, V., McPhee, J. C., Idsvoog, D., Pate, C., Scheuer, T., & Catterall, W. A. (2002).  
1298 Role of amino acid residues in transmembrane segments IS6 and IIS6 of the Na<sup>+</sup> channel  
1299 alpha subunit in voltage-dependent gating and drug block. *J Biol Chem*, *277*(38), 35393-  
1300 35401.
- 1301 Zhang, J. Z., Yarov-Yarovoy, V., Scheuer, T., Karbat, I., Cohen, L., Gordon, D., Gurevitz, M., &  
1302 Catterall, W. A. (2011). Structure-function map of the receptor site for beta-scorpion  
1303 toxins in domain II of voltage-gated sodium channels. *J Biol Chem*, *286*(38), 33641-  
1304 33651. doi:10.1074/jbc.M111.282509
- 1305 Zhang, J. Z., Yarov-Yarovoy, V., Scheuer, T., Karbat, I., Cohen, L., Gordon, D., Gurevitz, M., &  
1306 Catterall, W. A. (2012). Mapping the interaction site for a beta-scorpion toxin in the pore  
1307 module of domain III of voltage-gated Na<sup>(+)</sup> channels. *J Biol Chem*, *287*(36), 30719-  
1308 30728. doi:10.1074/jbc.M112.370742
- 1309

Figure 1

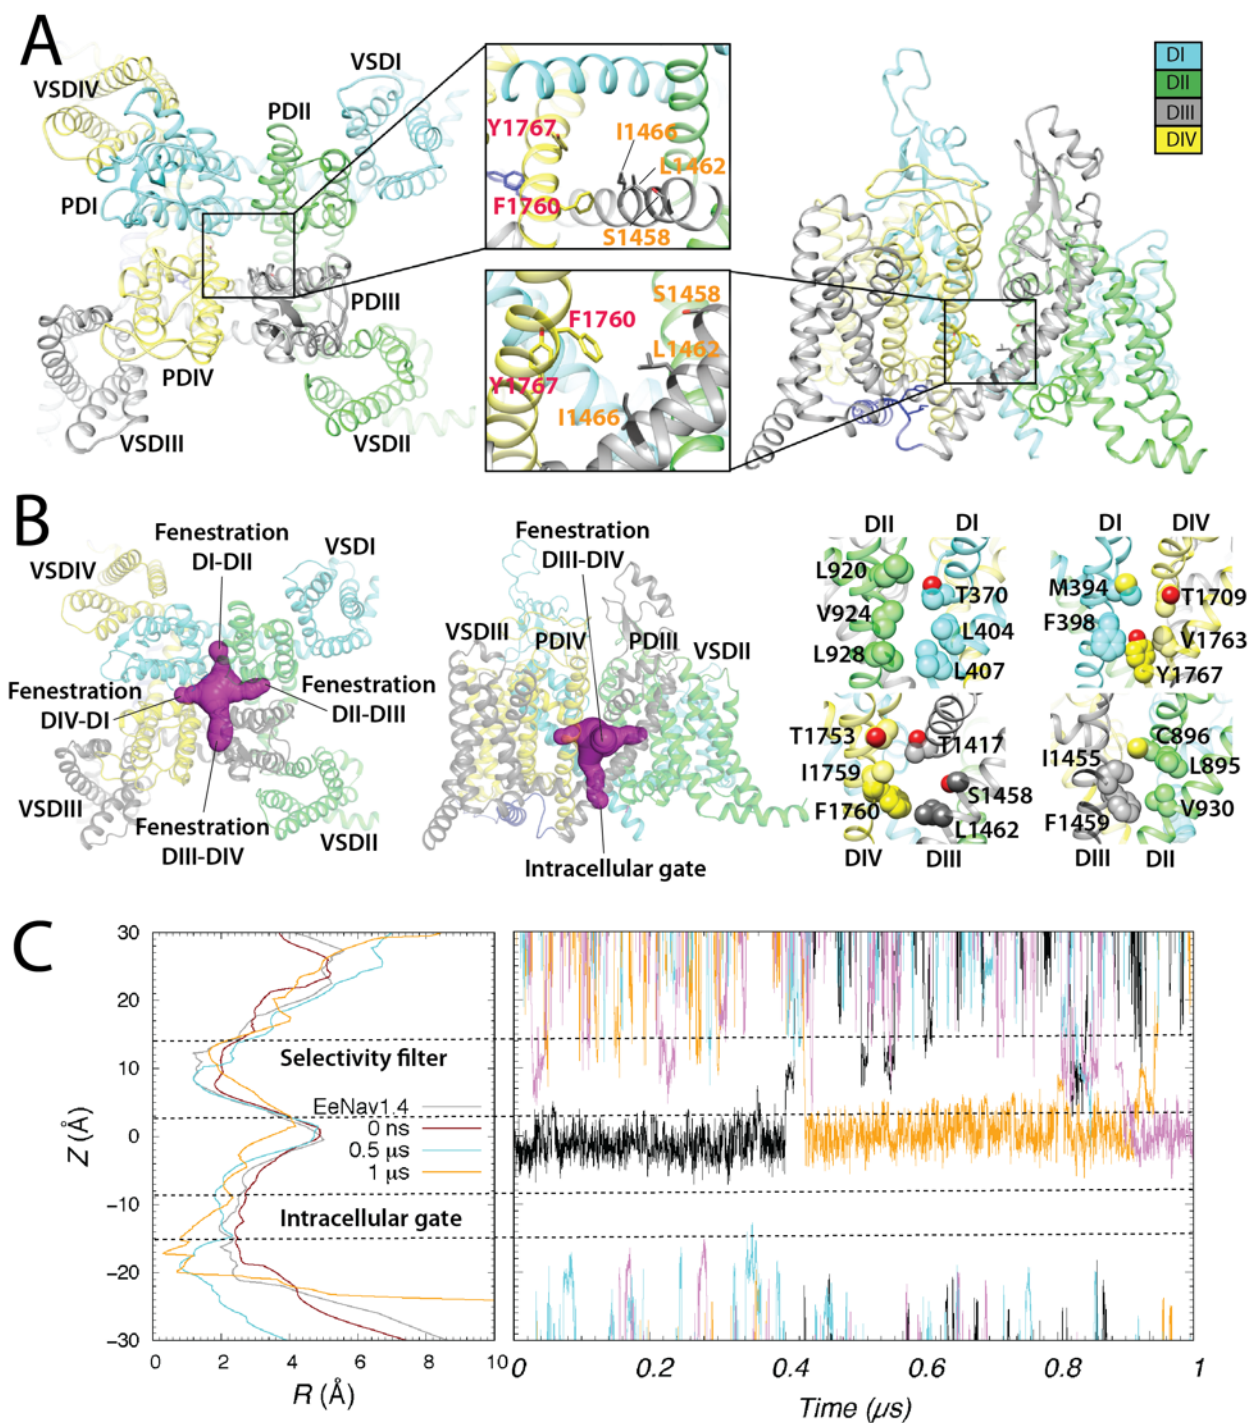

**Figure 1.** Rosetta model of the hNav<sub>1.5</sub> channel. (A) Extracellular (left panel) and transmembrane (right panel) views of the hNav<sub>1.5</sub> model shown in ribbon representation. Insets – zoom-in views of putative drug binding residues within hNav<sub>1.5</sub> pore lumen. Each domain is colored individually and labeled. In the insets, DIII residues are labeled orange, whereas DIV residues are labelled red. (B) Extracellular (left) and transmembrane (center and right) views of all four hNav<sub>1.5</sub> fenestrations using molecular surface representation (shown in purple in the left and center panels). In the right panels, fenestration-facing residue side chains are labelled and shown in space-filling representations using corresponding domain colors, with O atoms shown in red. (C) *Left panel*, hNav<sub>1.5</sub> pore lumen radius ( $R$ ) profile changes during molecular dynamic simulation at time zero (colored red), at 0.5  $\mu$ s (colored cyan), and at 1  $\mu$ s (colored orange). A pore lumen  $R$  profile for a cryoEM eeNav<sub>1.4</sub> structure is also shown in gray for comparison. *Right panel*, Sodium ion trajectories within the pore-forming domain during a 1  $\mu$ s molecular dynamic simulation of hNav<sub>1.5</sub>.



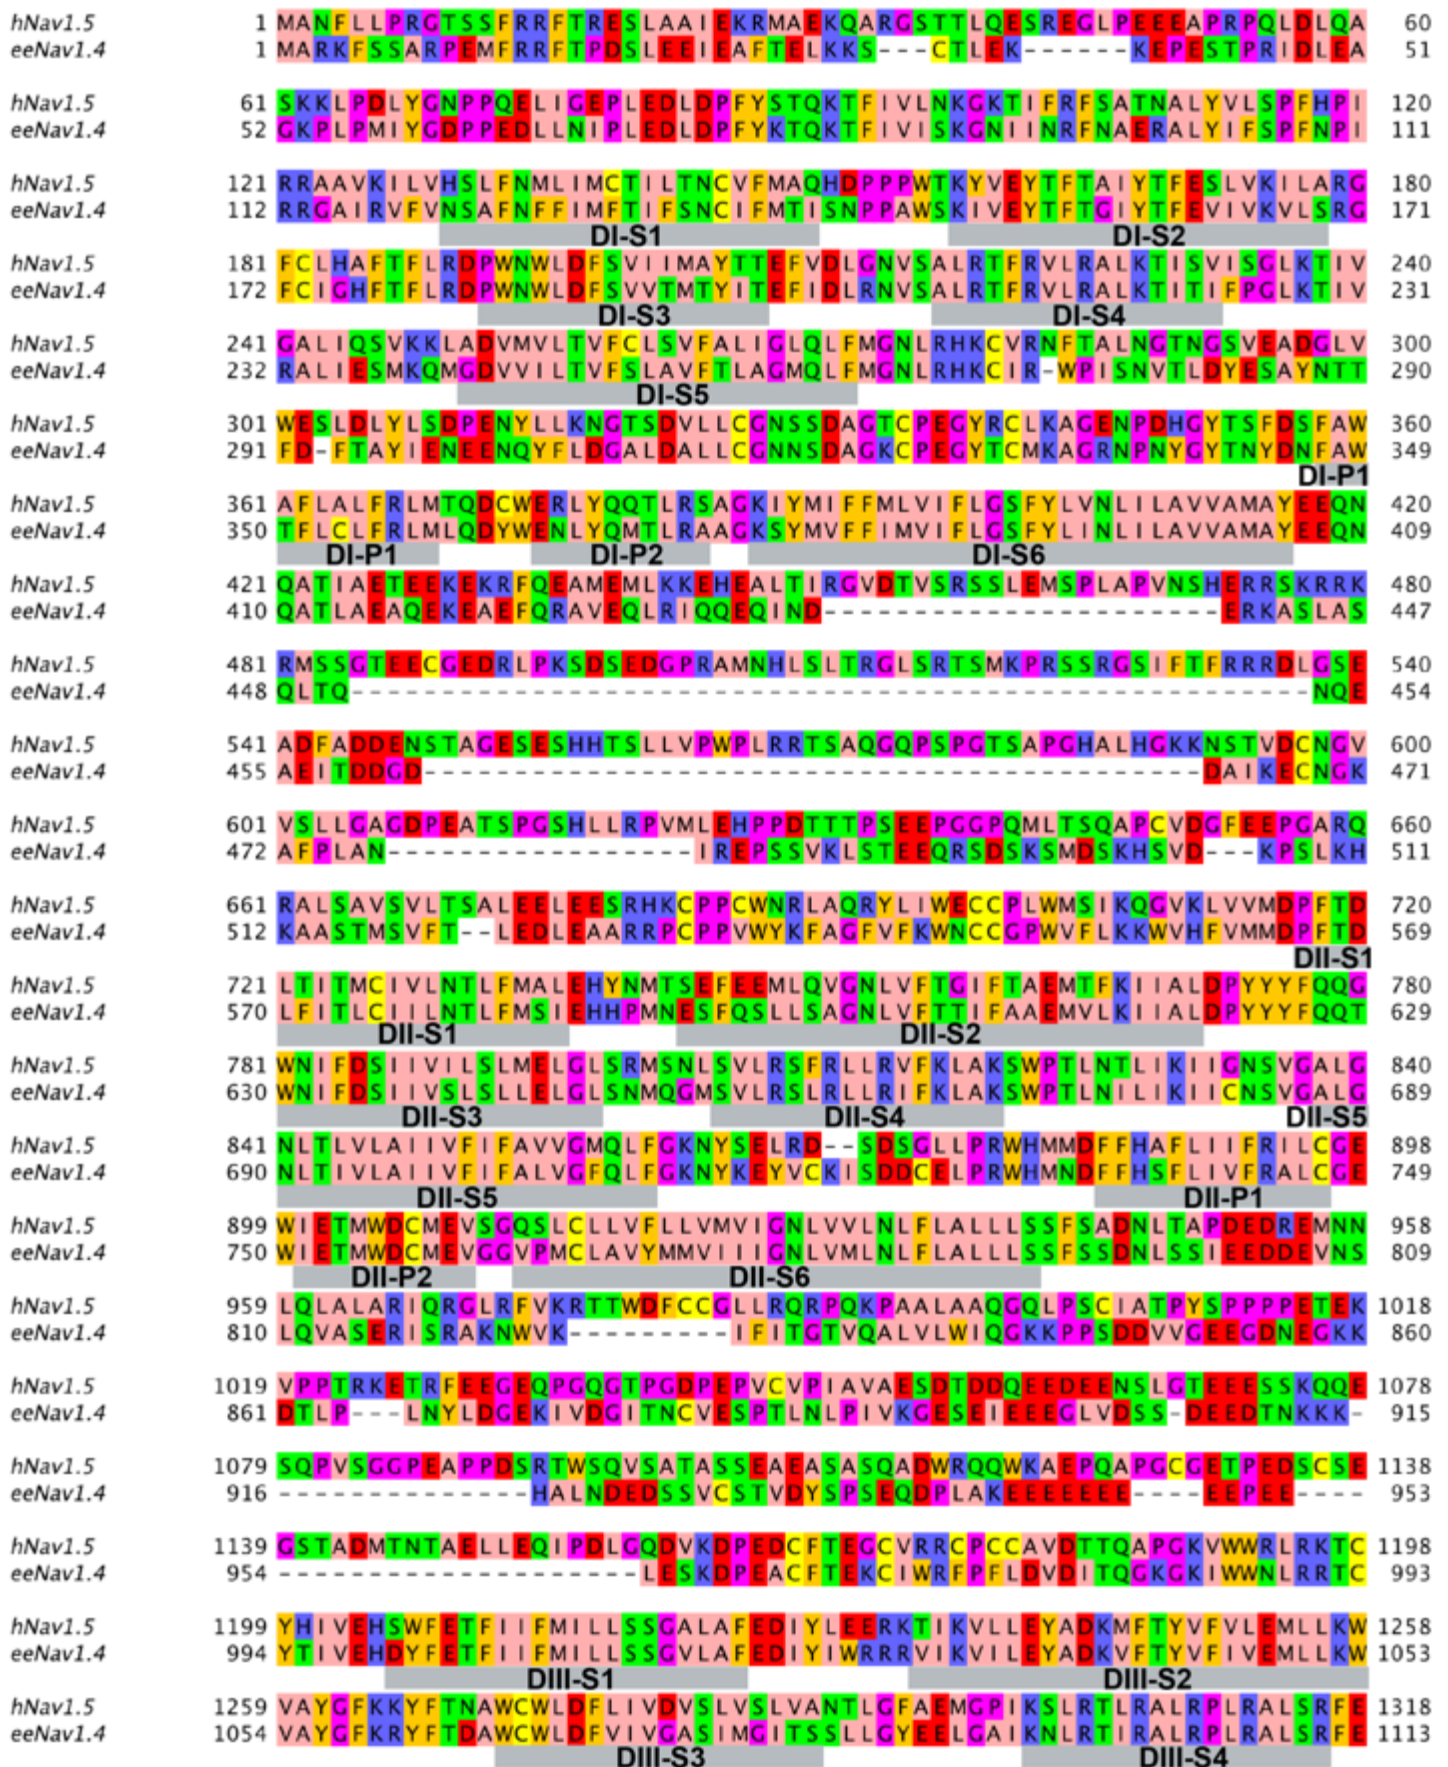

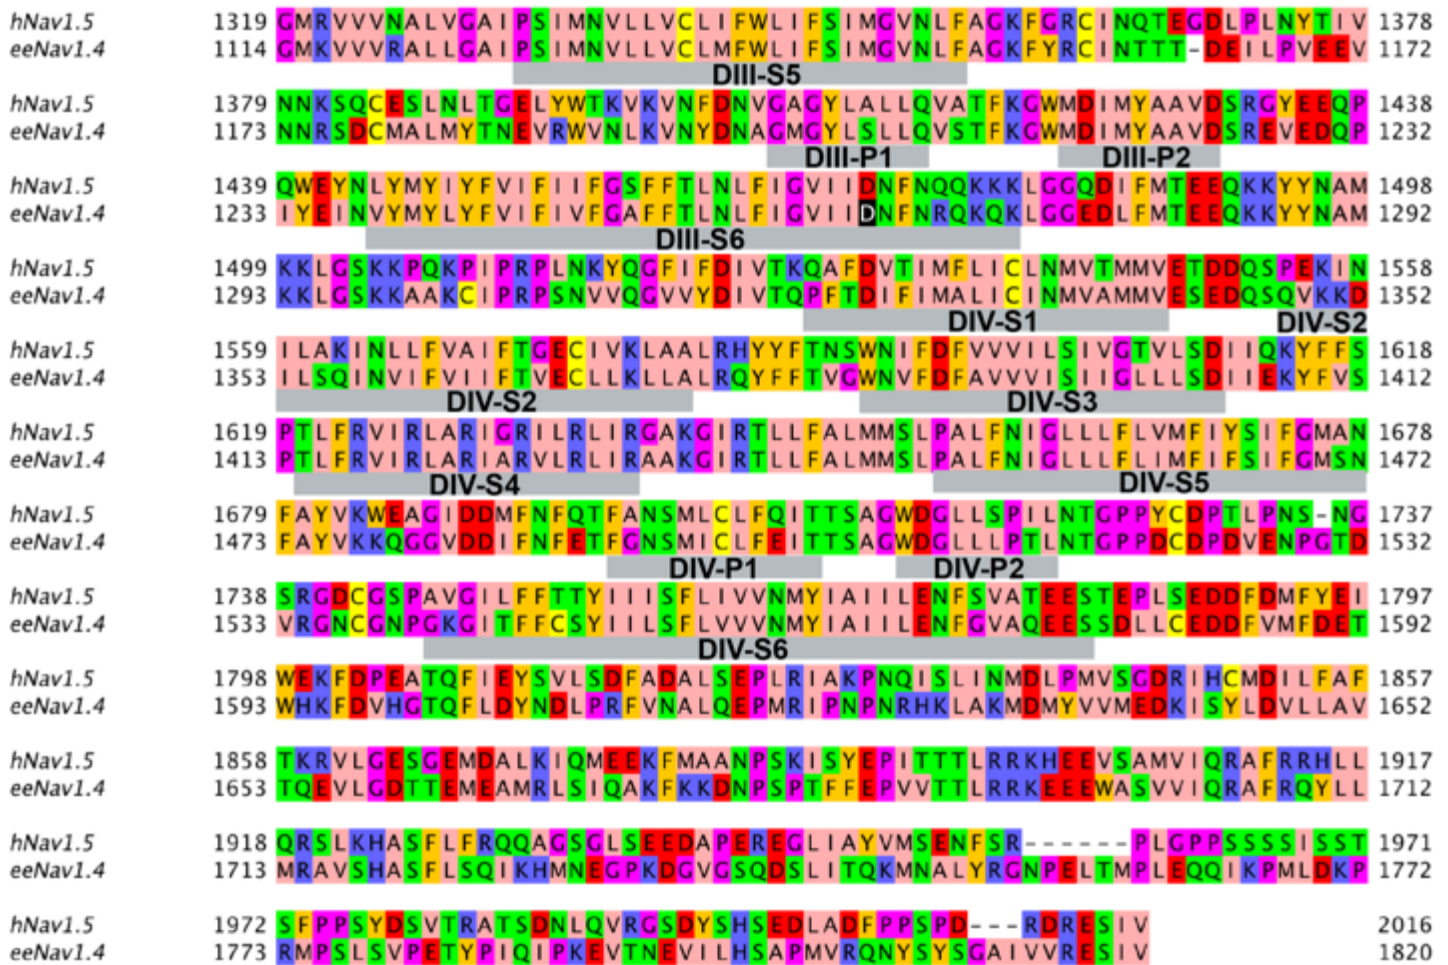

**Figure 1 – figure supplement 1.** Sequence alignment between hNav1.5 and eeNav1.4. Transmembrane segments S1-S6 and P1 and P2 helix regions in each domain are underlined by gray bars and labeled. Amino acids were colored with Jalview program using the Zappo color scheme, where hydrophobic residues (I, L, V, A, and M) are colored pink, aromatic residues (F, W, and Y) are colored orange, positively charged residues (K, R, and H) are colored blue, negatively charged residues (D and E) are colored red, hydrophilic residues (S, T, N, and Q) are colored green, P and G colored magenta, and C is colored yellow.

Figure 1 – figure supplement 2

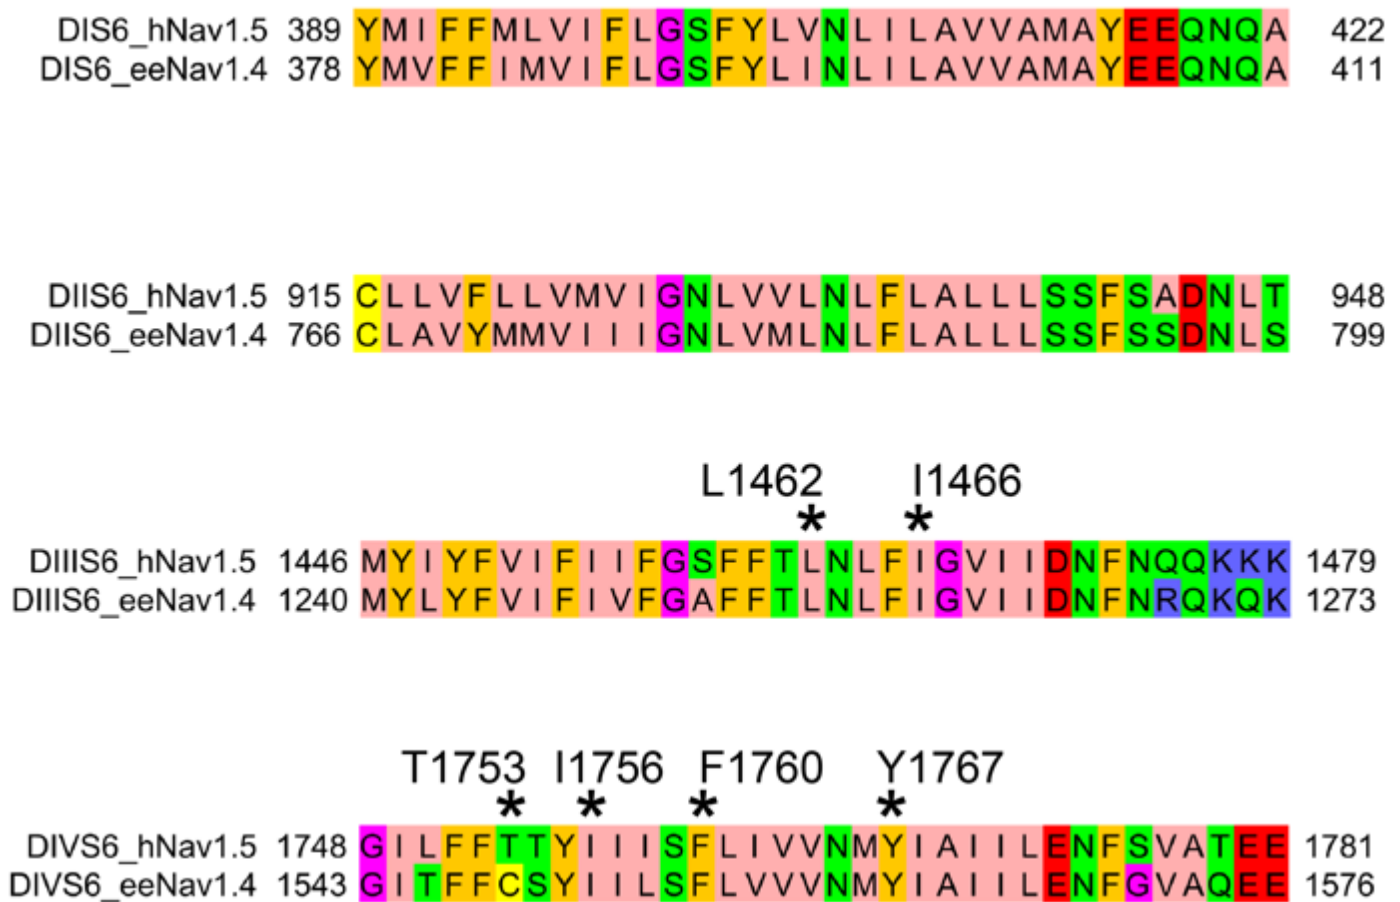

**Figure 1 – figure supplement 2.** Sequence alignment between hNav1.5 and eeNav1.4 transmembrane segments S6. Specific hNav1.5 residues discussed in the main text are marked by asterisk and labeled. Amino acids were colored as in Figure 1 – figure supplement 1.

Figure 1 – figure supplement 3

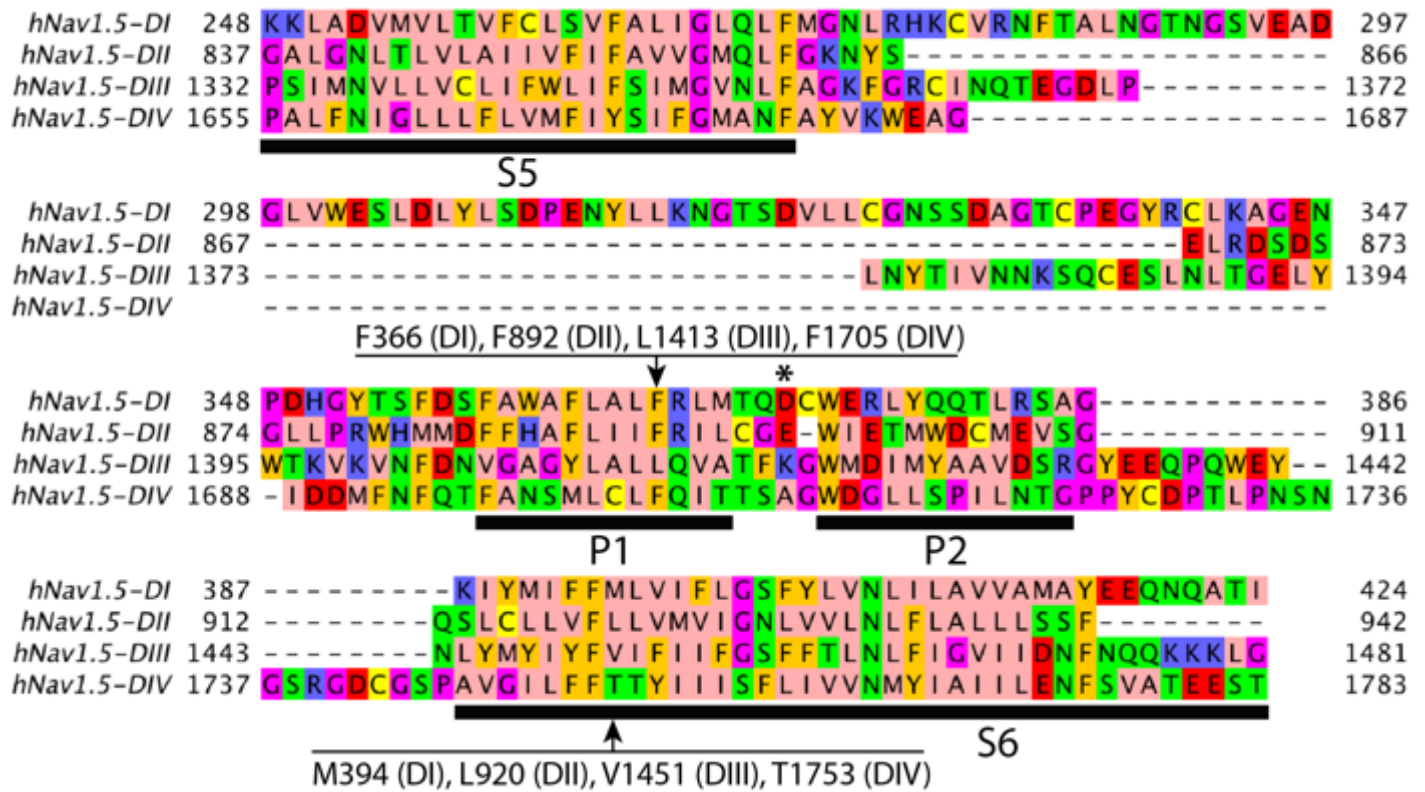

**Figure 1 – figure supplement 3.** Sequence alignment between four domains of hNav1.5 segments S5, P1-helix, P2-helix, and S6. Specific hNav1.5 residues discussed in the main text are marked by arrows and labeled. Transmembrane segments S5 and S6 and P1 and P2 helix regions in each domain are underlined by black bars and labeled. Amino acids were colored as in Figure 1 – figure supplement 1.

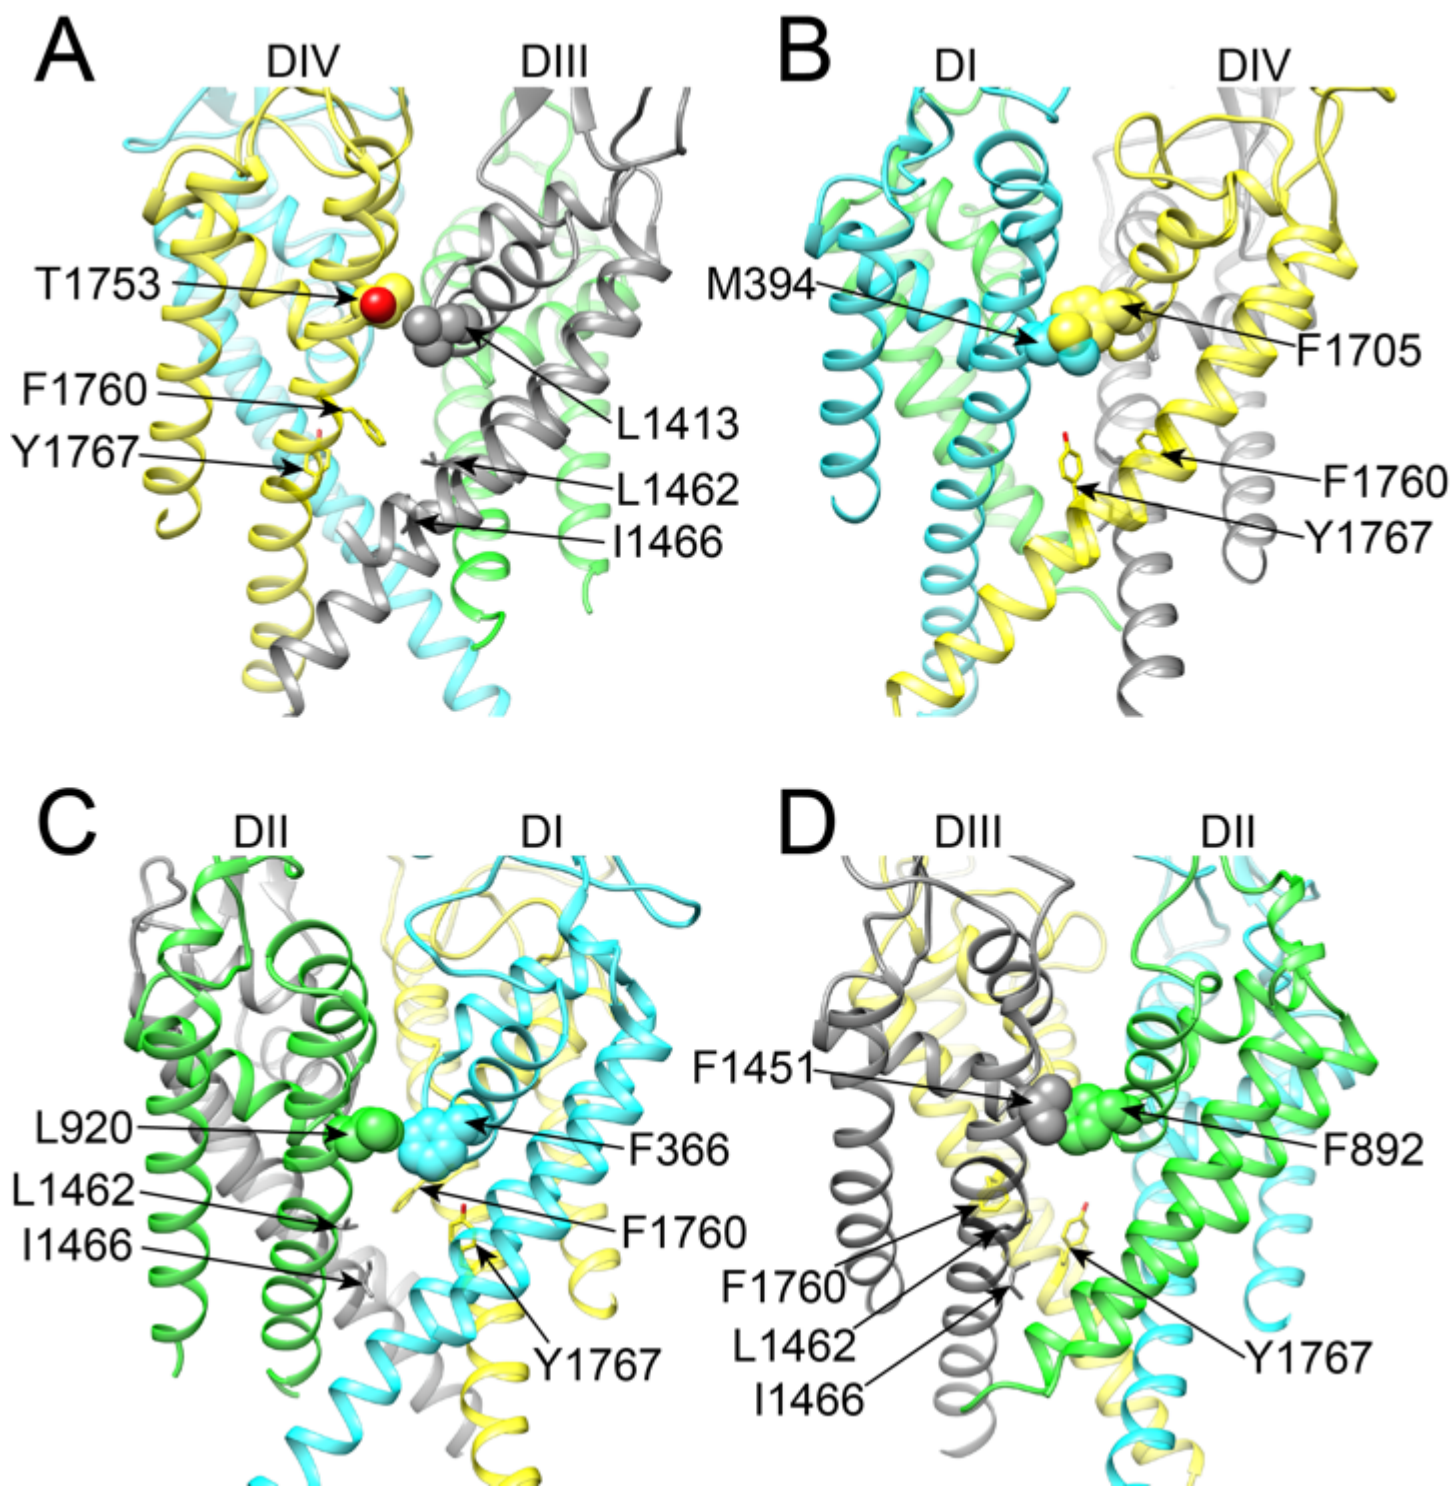

**Figure 1 – figure supplement 4.** Transmembrane views of all four hNav1.5 fenestrations. (A) DIII and DIV fenestration. (B) DI and DIV fenestration. (C) DI and DII fenestration. (D) DII and DIII fenestration. Side chains of fenestration-forming residues are shown in space-filling or stick representations, labeled, and colored using corresponding domain colors, with O atom shown in red.

Figure 2

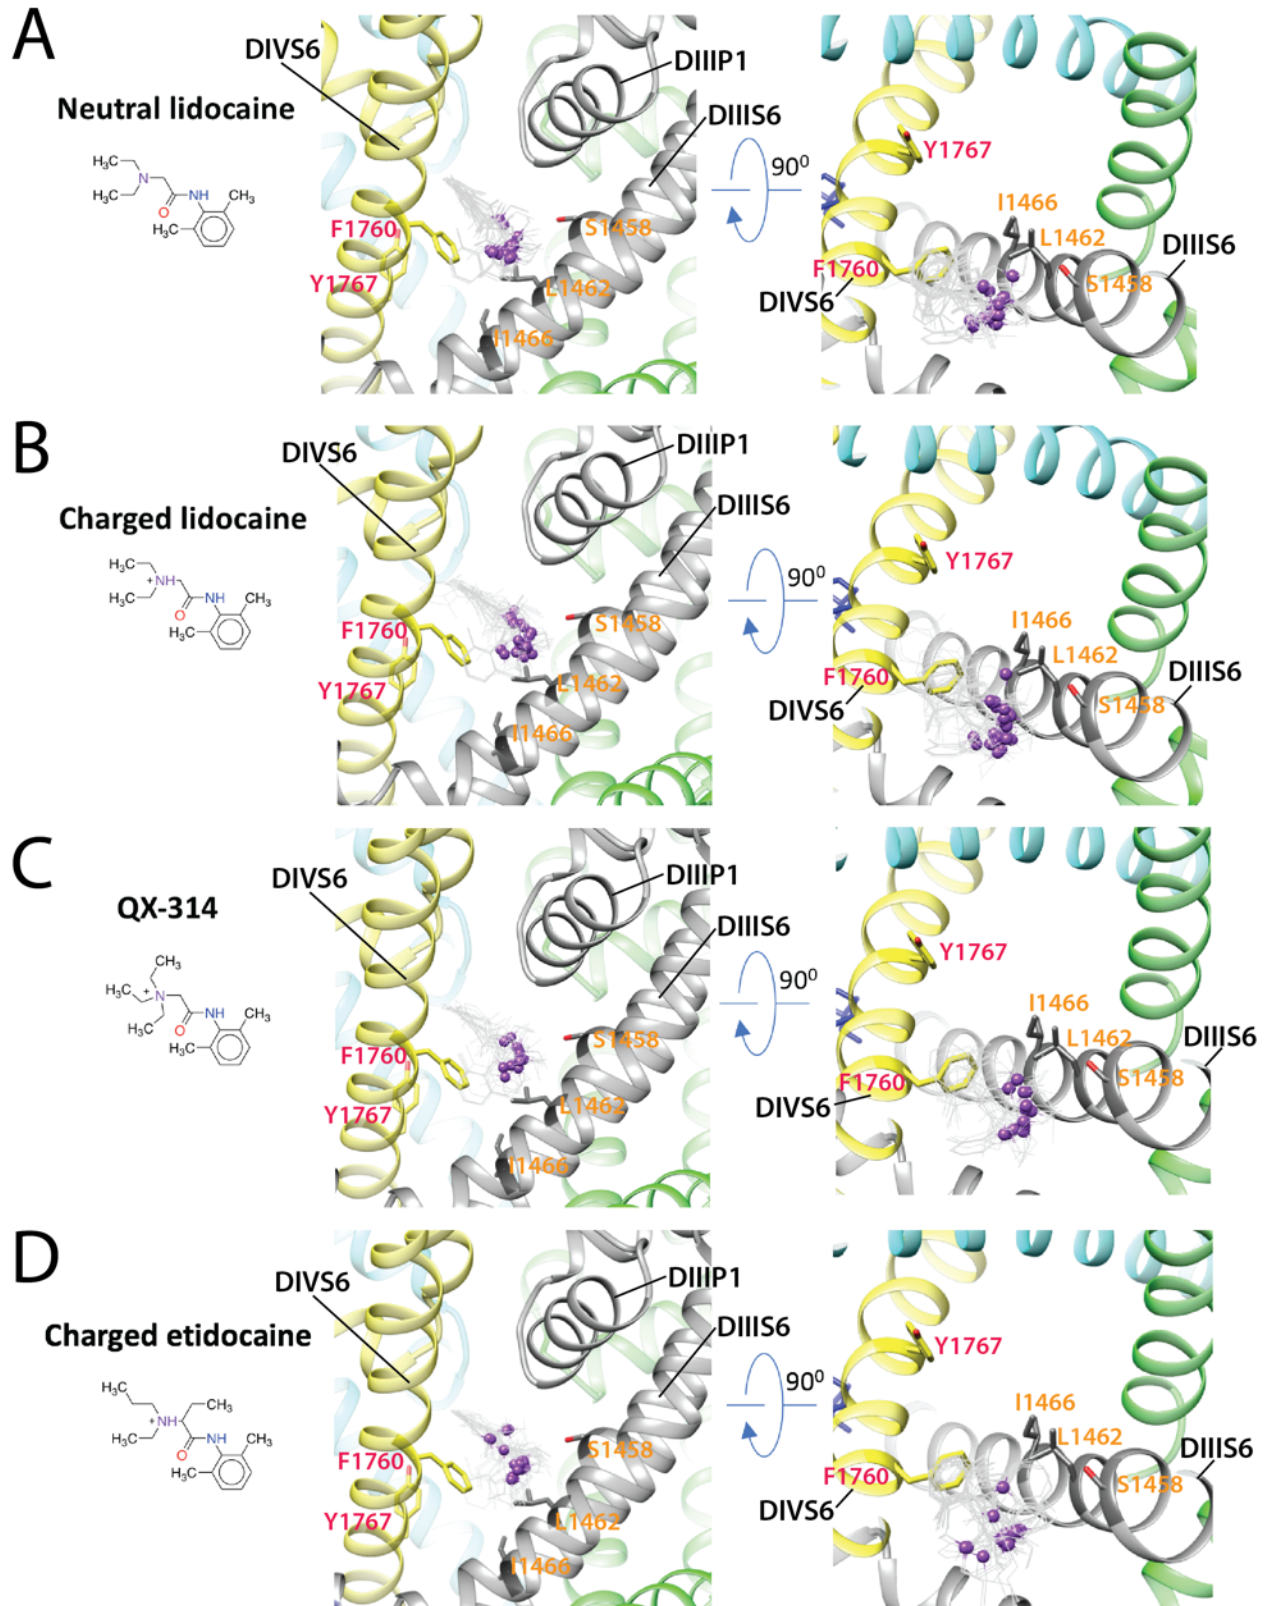

**Figure 2.** Rosetta models of hNav<sub>v</sub>1.5 channel interaction with antiarrhythmic and local anesthetic drugs. Close up transmembrane (left panels) and extracellular (right panels) views of hNav<sub>v</sub>1.5 interactions with: (A) neutral lidocaine; (B) charged lidocaine; (C) QX-314; (D) charged etidocaine. Drug molecules are shown in the wireframe representations with basic N atoms depicted as purple balls. hNav<sub>v</sub>1.5 domain I is colored in blue, domain II is colored in green, domain III is colored in gray, domain IV is colored in yellow. Side chains of key residues forming the receptor site in DIIIS6 and DIVS6 segments are shown in stick representation and labeled in orange and red, respectively.

Figure 2 – figure supplement 1

## Neutral lidocaine

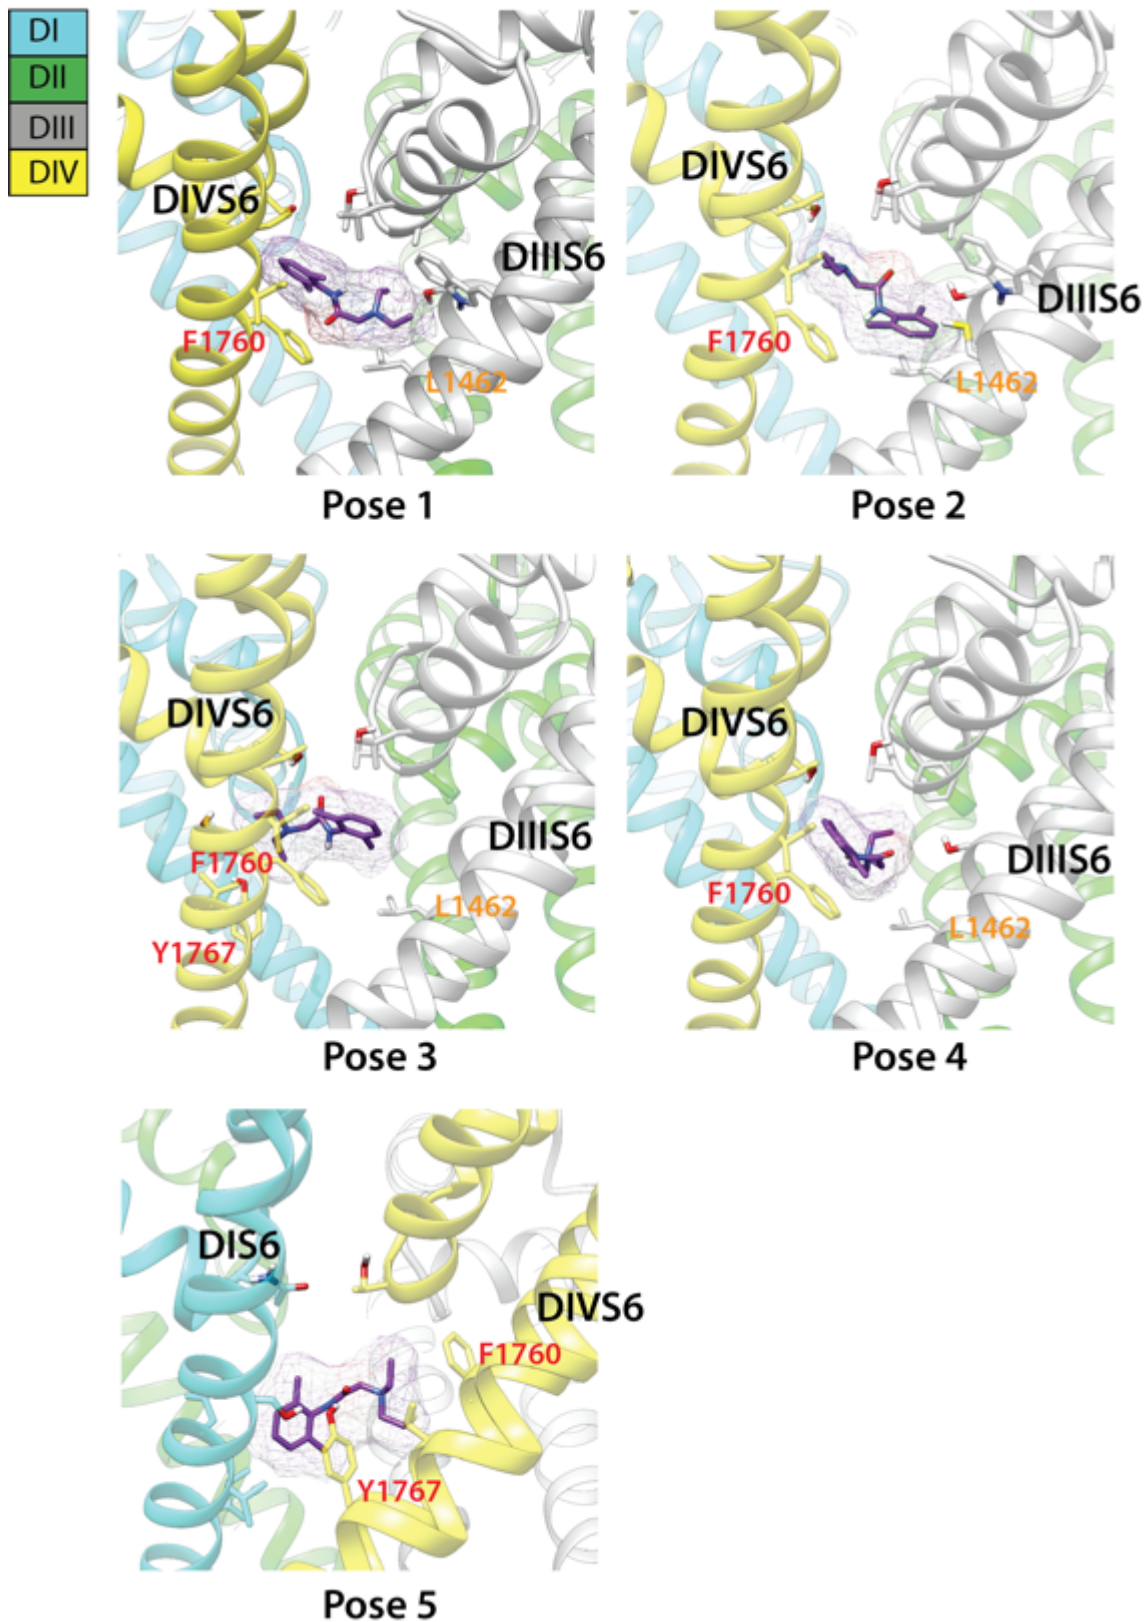

**Figure 2 – figure supplement 1.** Top binding poses of neutral lidocaine interaction with Rosetta model of hNav1.5 channel. Domain I is colored in blue, domain II is colored in green, domain III is colored gray, and domain IV is colored yellow. hNav1.5 residues forming interactions with lidocaine are shown in stick representation and labeled. Lidocaine is shown in stick and surface representation and colored purple.

Figure 2 – figure supplement 2

## Charged lidocaine

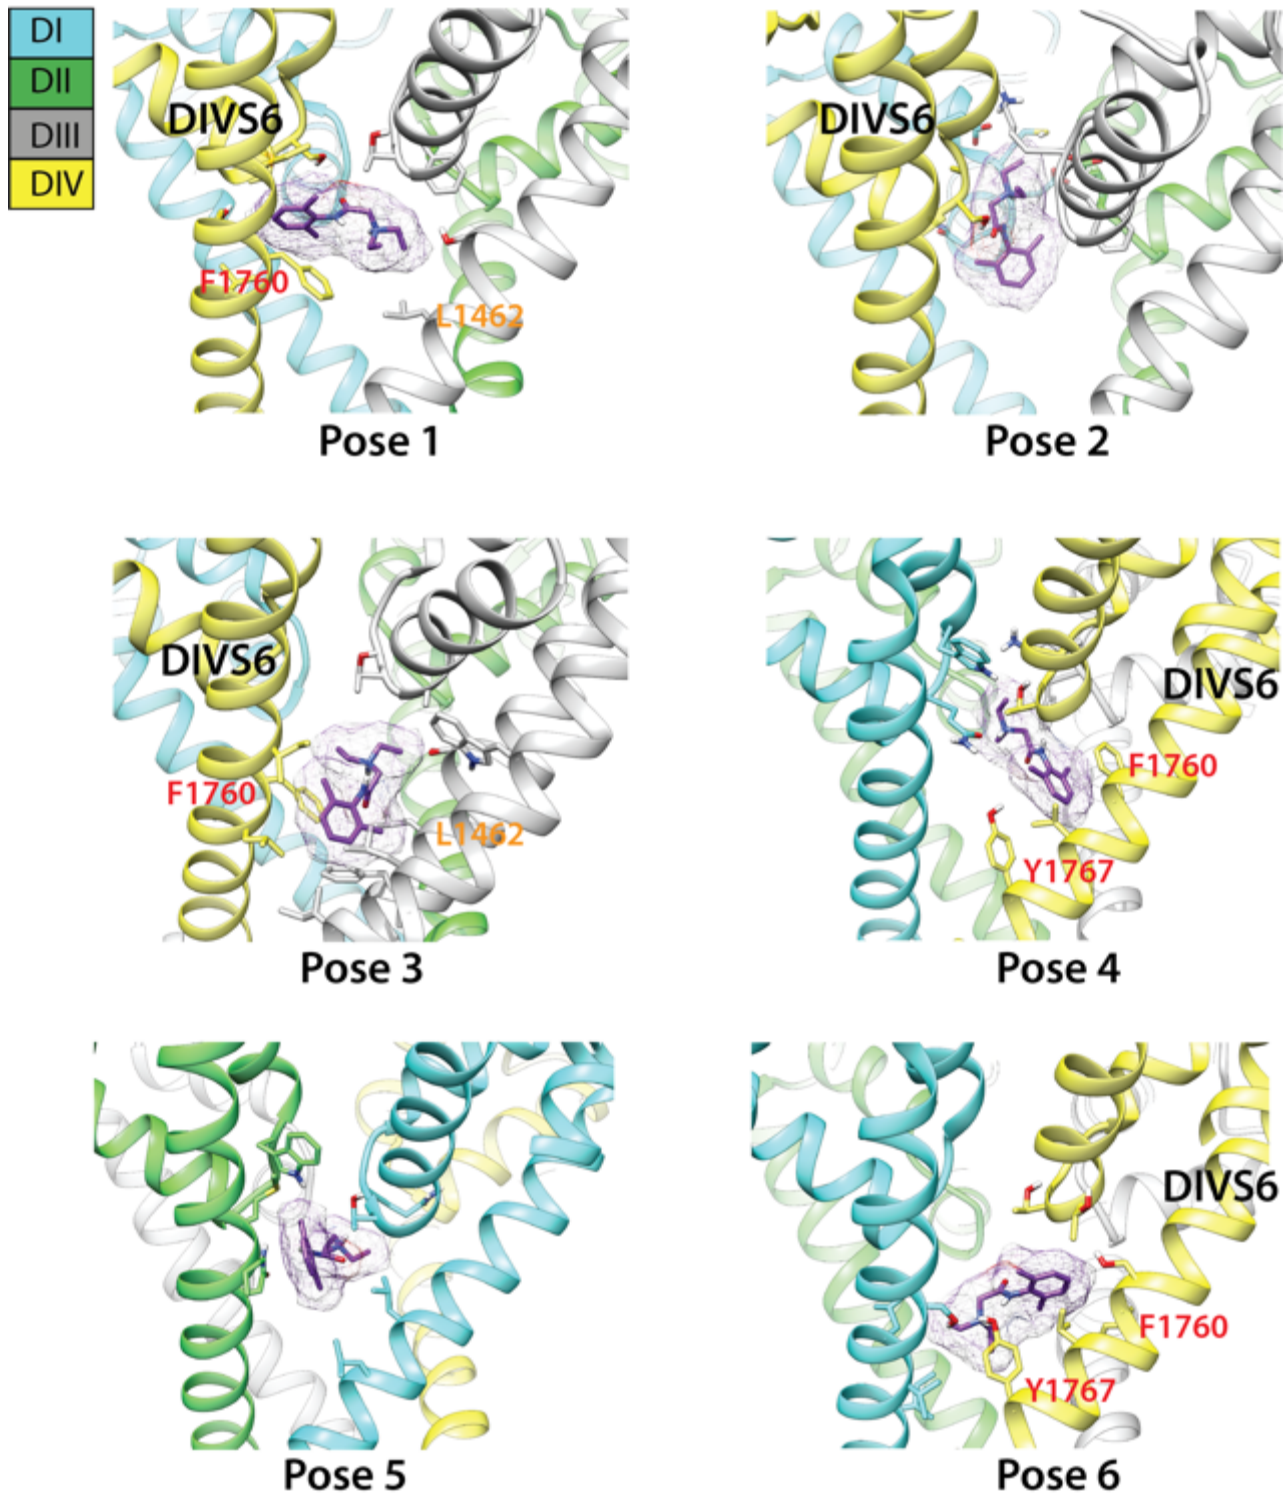

**Figure 2 – figure supplement 2.** Top binding poses of charged lidocaine interaction with Rosetta model of hNav1.5 channel. Domain I is colored in blue, domain II is colored in green, domain III is colored gray, and domain IV is colored yellow. hNav1.5 residues forming interactions with lidocaine are shown in stick representation and labeled. Lidocaine is shown in stick and surface representation and colored purple.



## QX-314

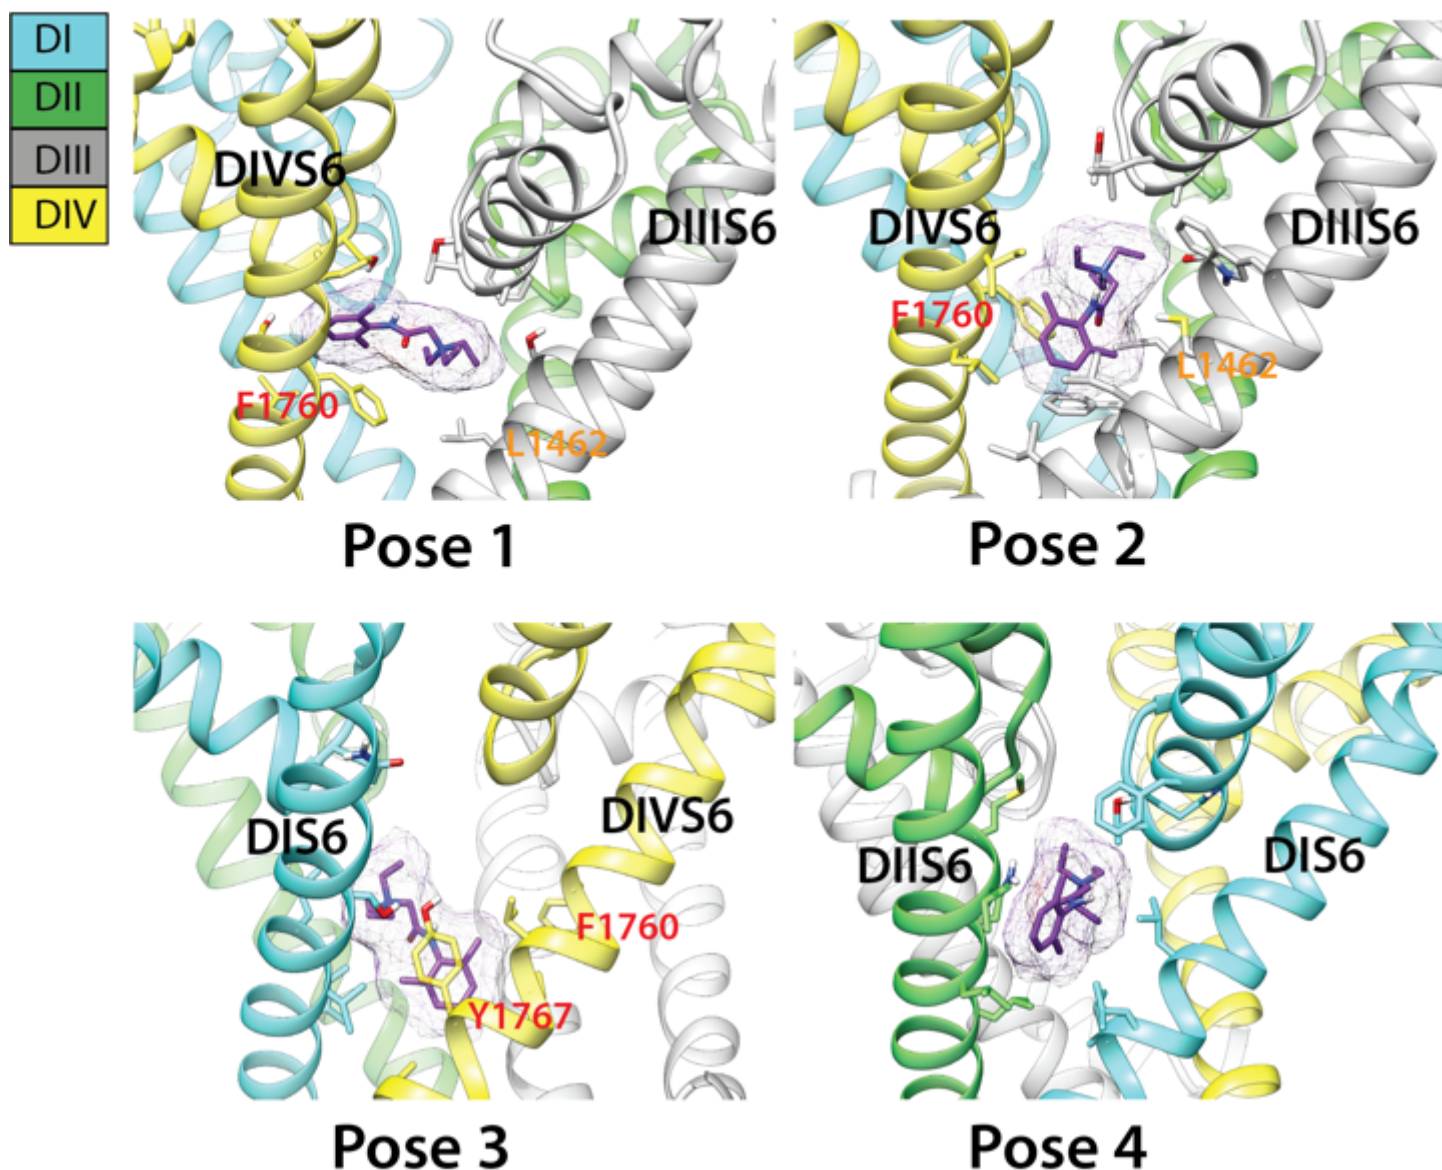

**Figure 2 – figure supplement 3.** Top binding poses of QX-314 interaction with Rosetta model of hNav1.5 channel. Domain I is colored in blue, domain II is colored in green, domain III is colored gray, and domain IV is colored yellow. hNav1.5 residues forming interactions with lidocaine are shown in stick representation and labeled. QX-314 is shown in stick and surface representation and colored purple.

## Charged etidocaine

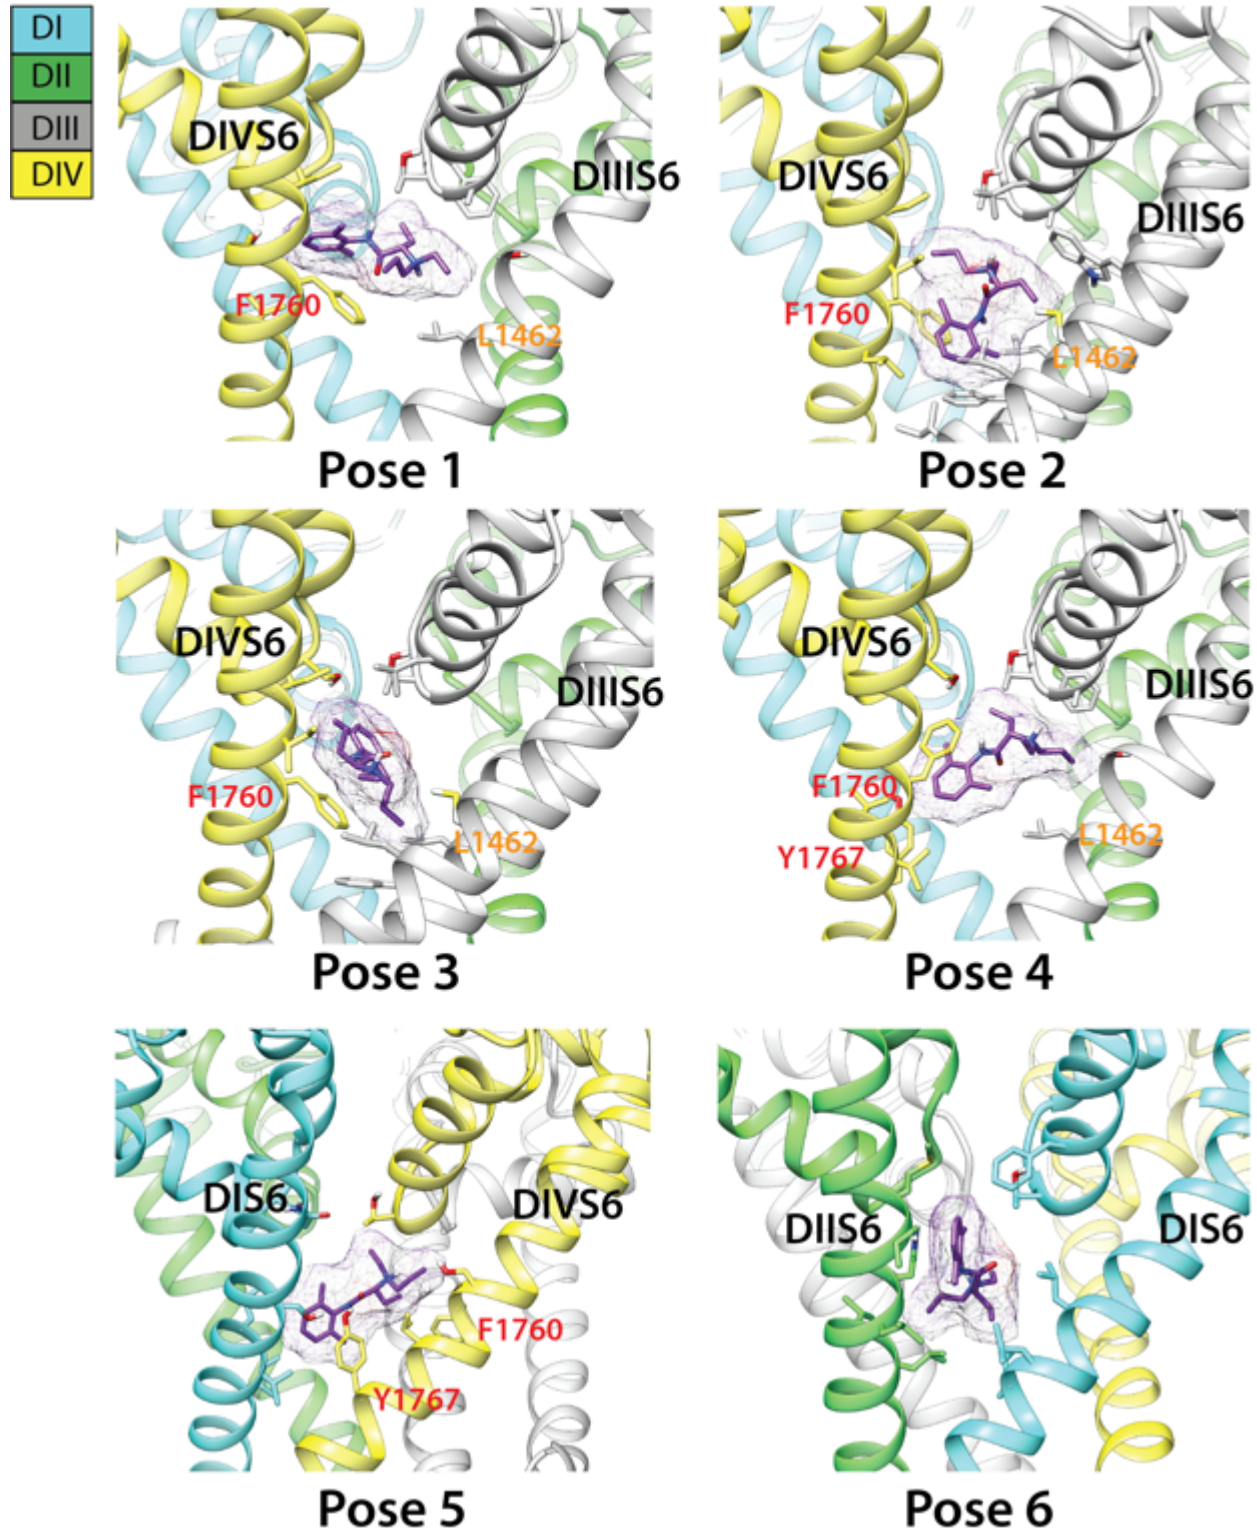

**Figure 2 – figure supplement 4.** Top binding poses of charged etidocaine interaction with Rosetta model of hNav1.5 channel. Domain I is colored in blue, domain II is colored in green, domain III is colored gray, and domain IV is colored yellow. hNav1.5 residues forming interactions with lidocaine are shown in stick representation and labeled. Etidocaine is shown in stick and surface representation and colored purple.

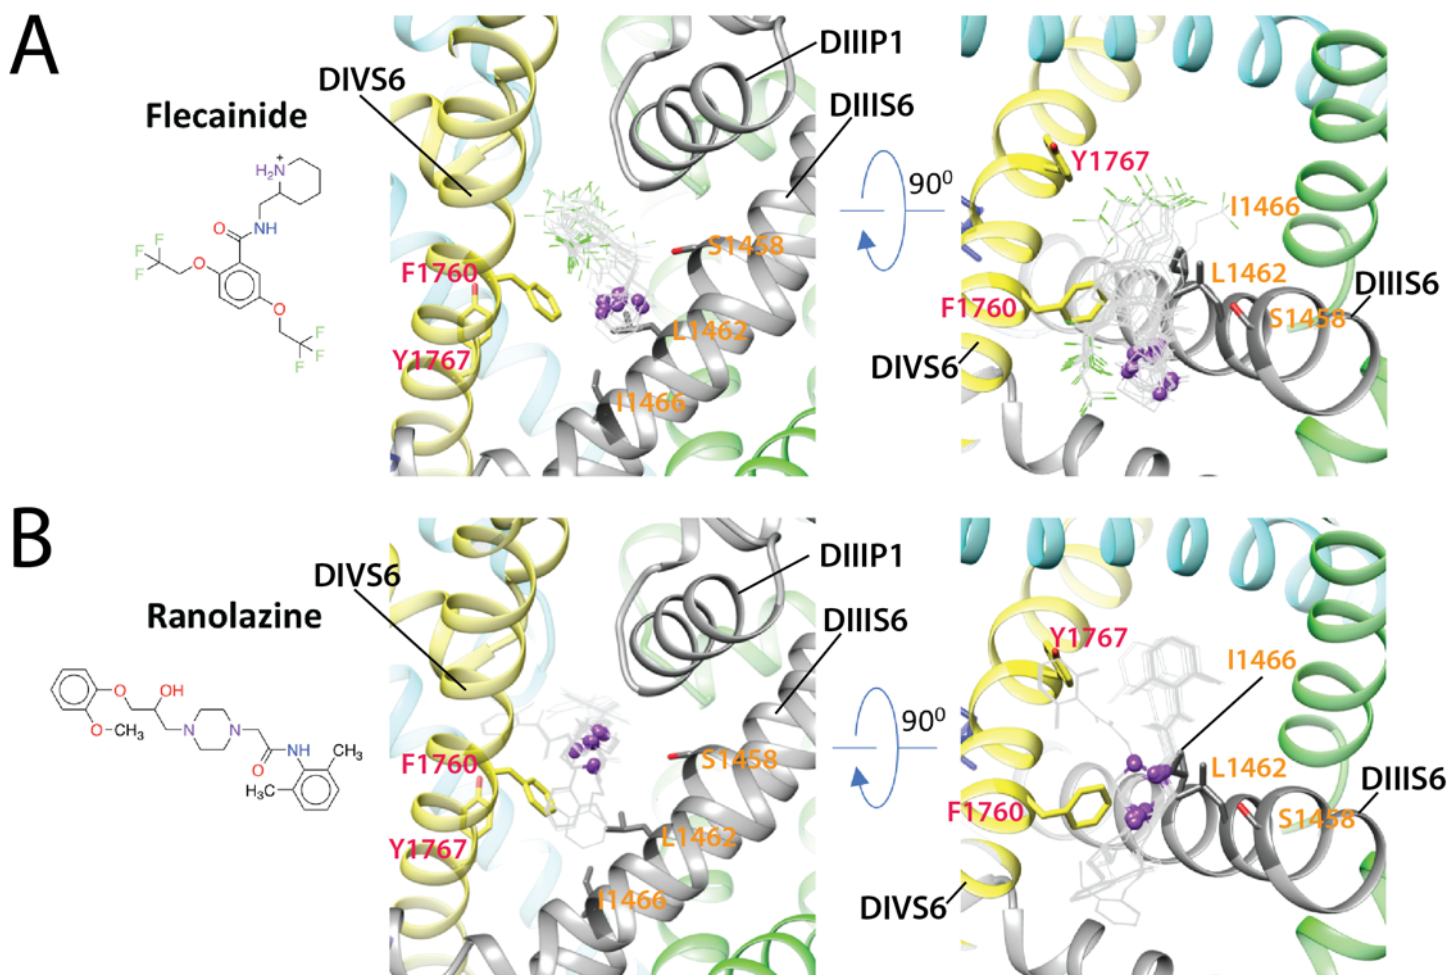

**Figure 3.** Rosetta models of hNav<sub>v</sub>1.5 channel interaction with antiarrhythmic and local anesthetic drugs. Close up transmembrane (left panel) and extracellular (right panel) view of hNav<sub>v</sub>1.5 interactions with (A) flecainide; (B) ranolazine. Drug molecules are shown in the wireframe representations with flecainide F atoms colored in green and basic N atoms of both drugs depicted as purple balls. hNav<sub>v</sub>1.5 domain I is colored in blue, domain II is colored in green, domain III is colored in gray, domain IV is colored in yellow. Side chains of key residues forming the receptor site in DIIS6 and DIVS6 are shown in stick representation and labeled in orange and red, respectively.

## Flecainide

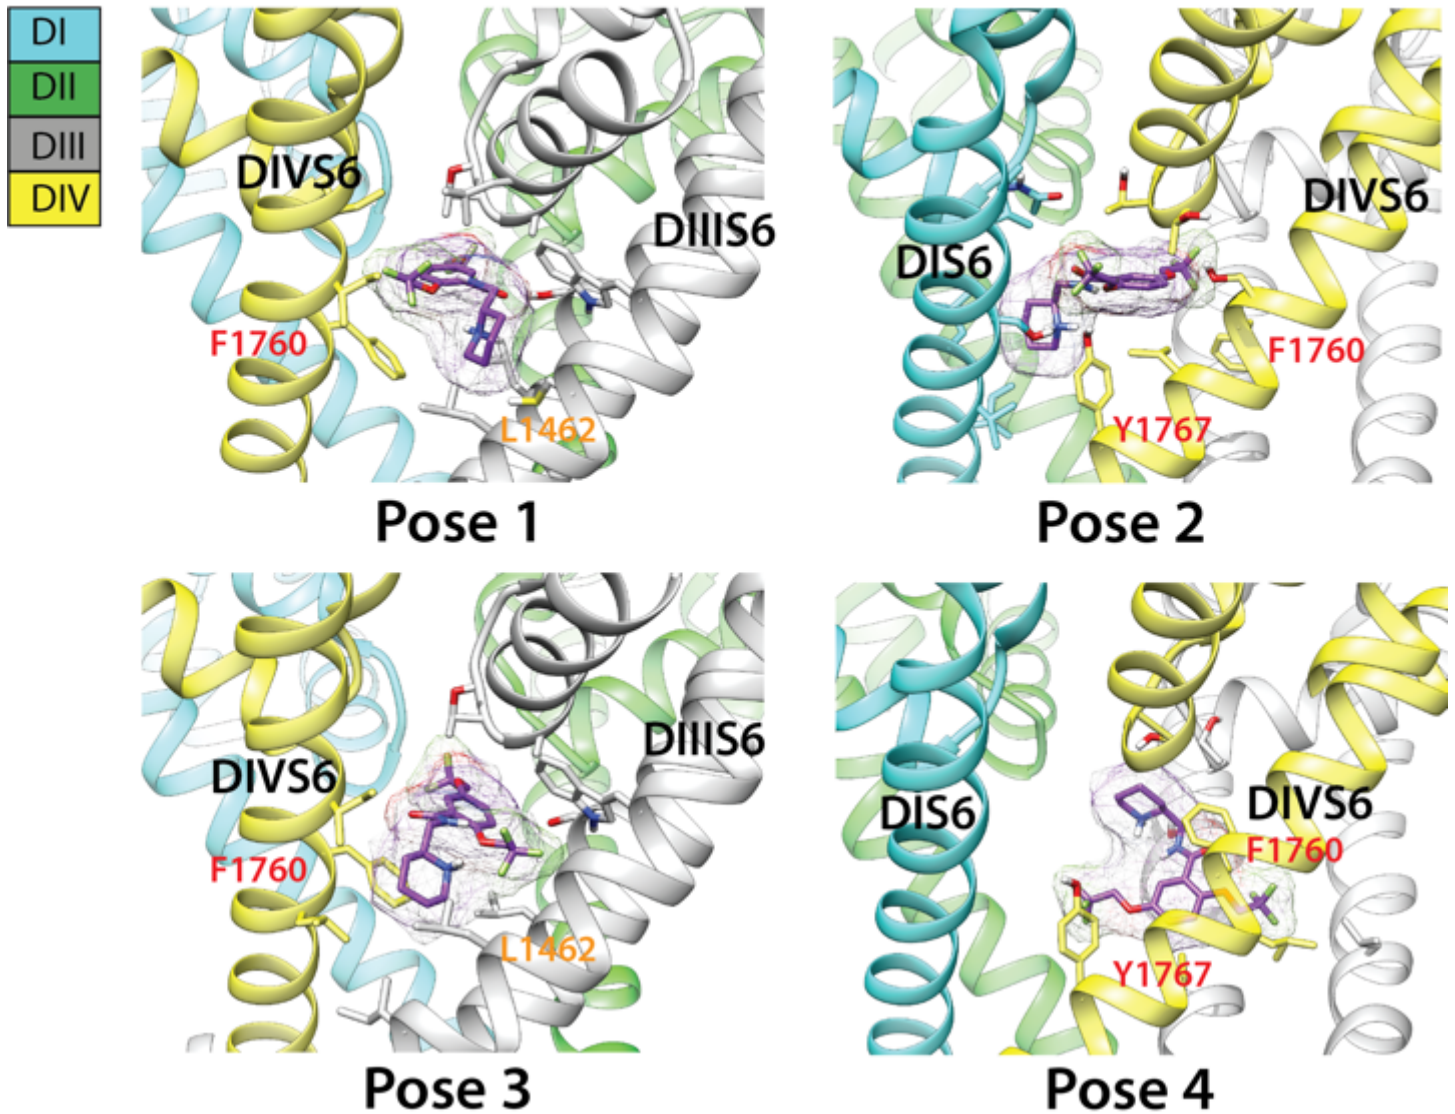

**Figure 3 – figure supplement 1.** Top binding poses of flecainide interaction with Rosetta model of hNav1.5 channel. Domain I is colored in blue, domain II is colored in green, domain III is colored gray, and domain IV is colored yellow. hNav1.5 residues forming interactions with lidocaine are shown in stick representation and labeled. Flecainide is shown in stick and surface representation and colored purple.

## Ranolazine

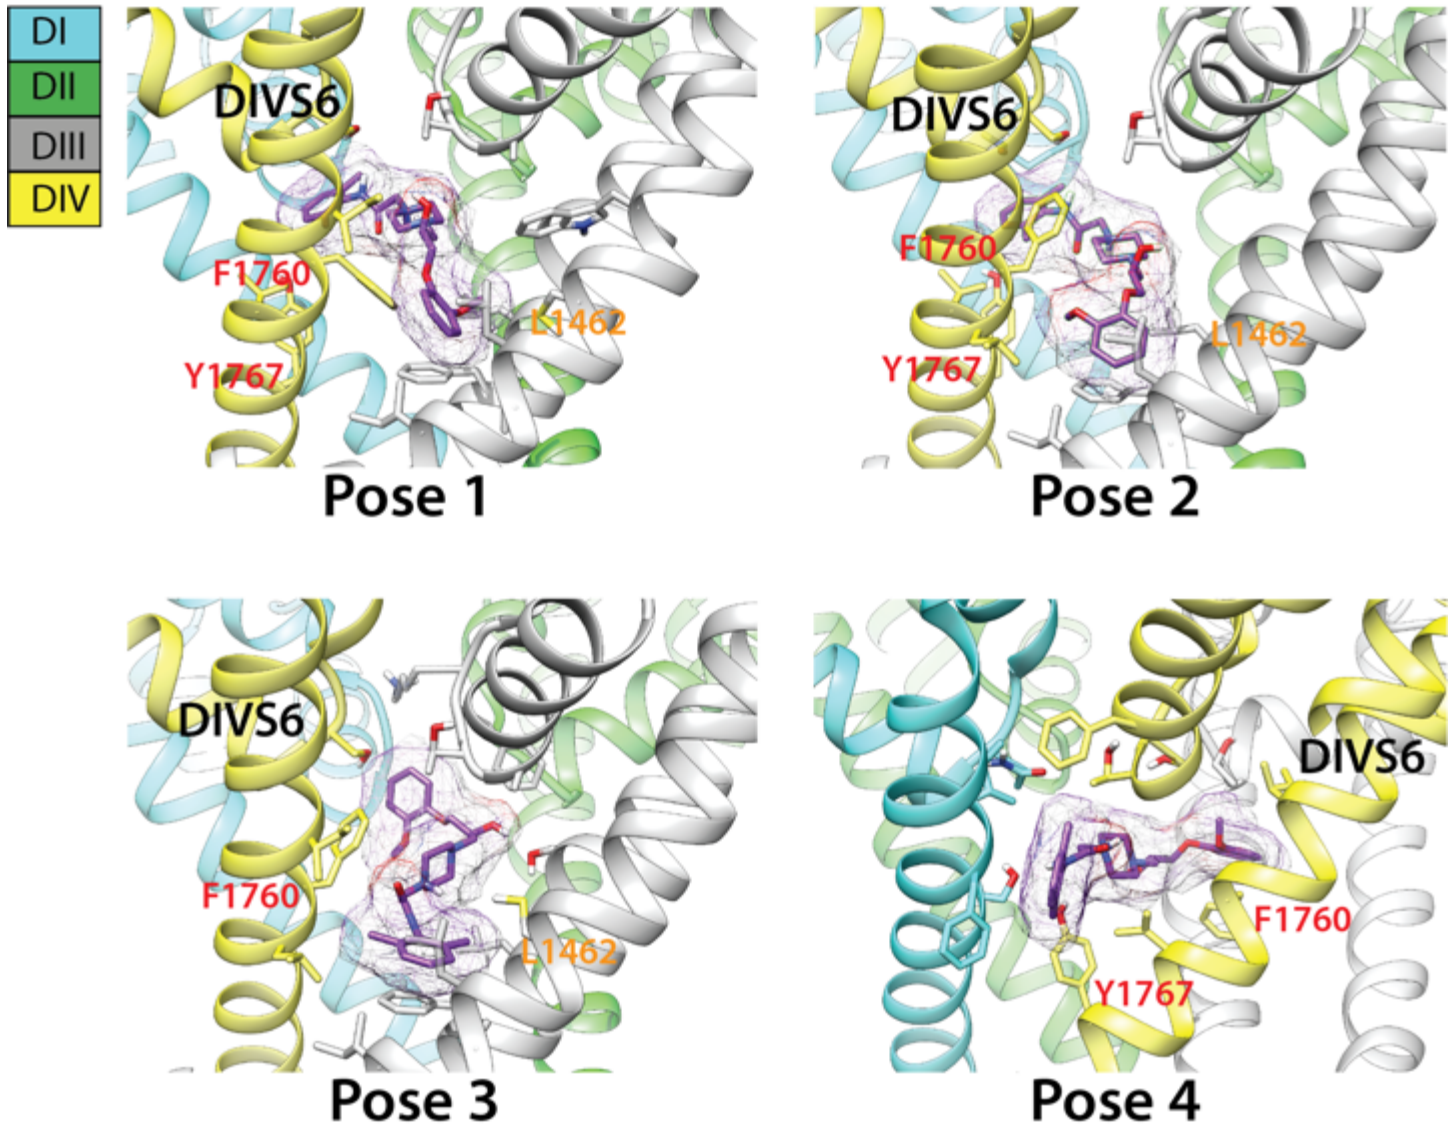

**Figure 3 – figure supplement 2.** Top binding poses of ranolazine interaction with Rosetta model of hNav1.5 channel. Domain I is colored in blue, domain II is colored in green, domain III is colored gray, and domain IV is colored yellow. hNav1.5 residues forming interactions with lidocaine are shown in stick representation and labeled. Ranolazine is shown in stick and surface representation and colored purple.

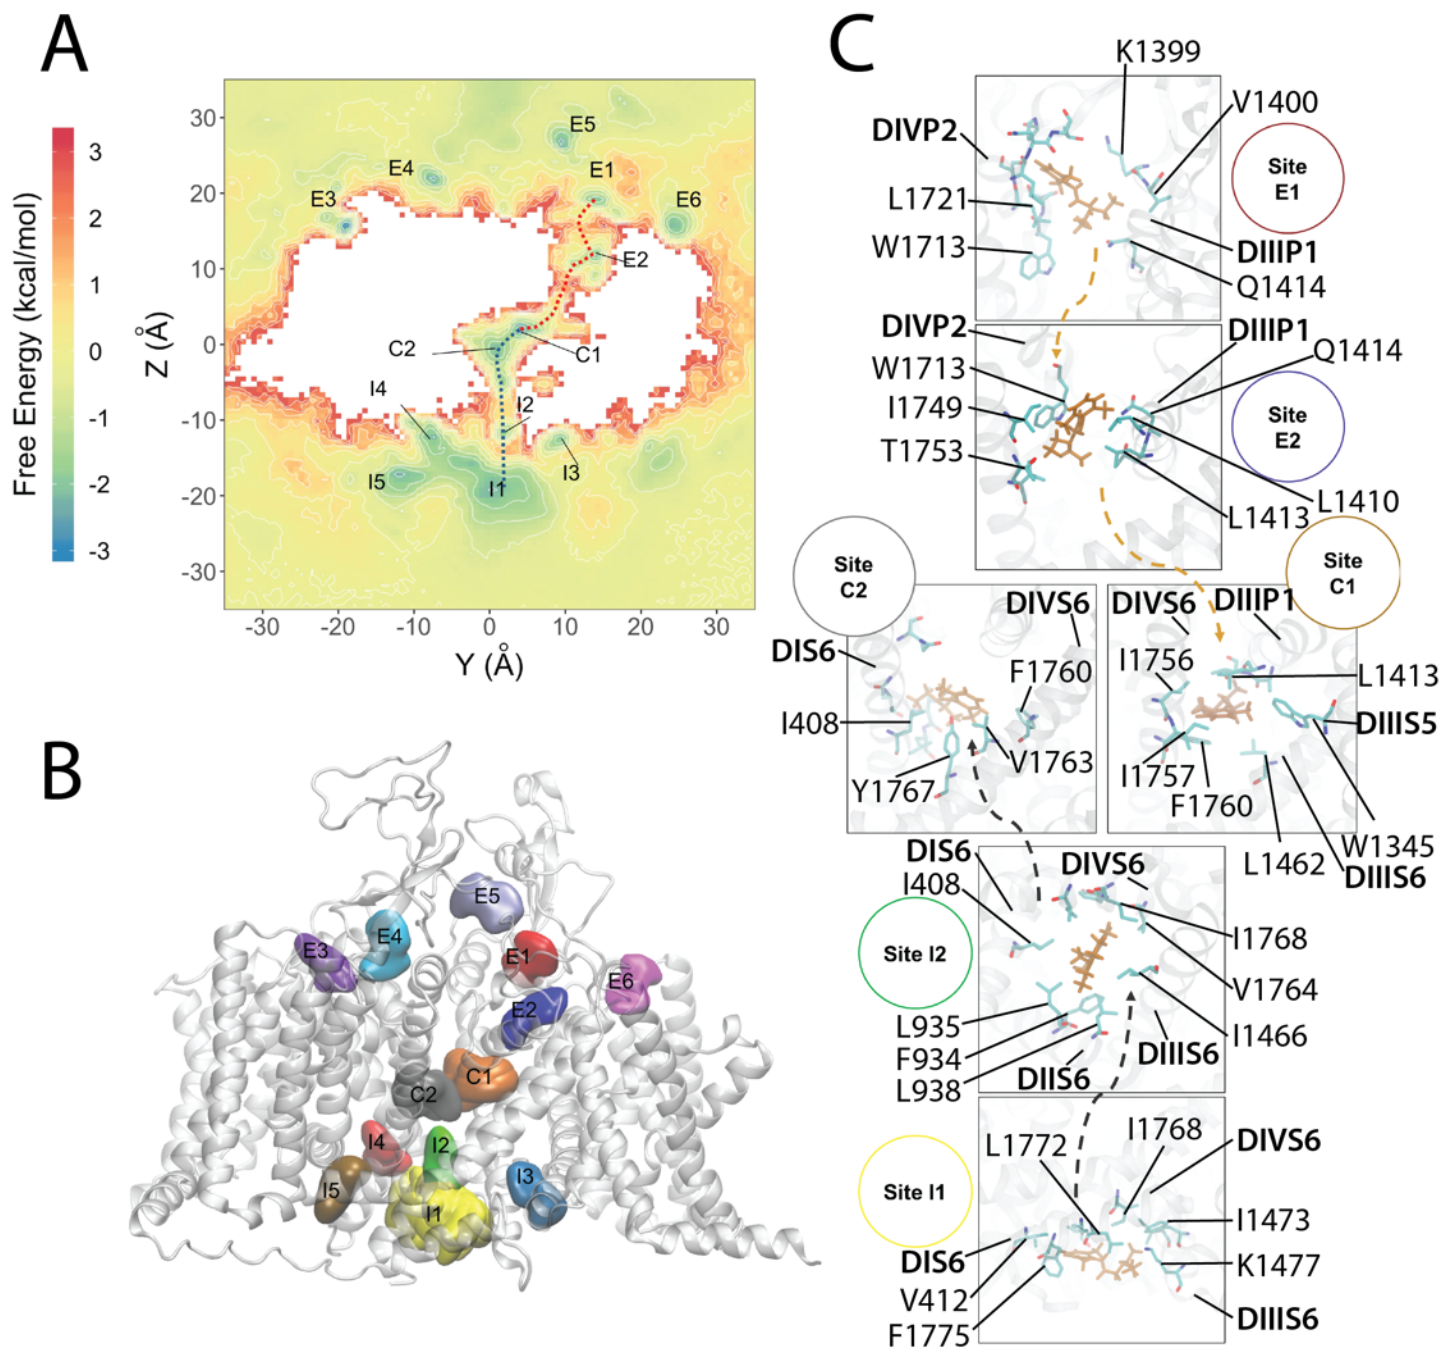

**Figure 4.** Molecular dynamics simulation of the hNav<sub>v</sub>1.5 channel interaction with neutral lidocaine reveals two drug access pathways. (A) Free energy surface of neutral lidocaine binding projected on the Y-Z plane (with Z corresponding to a transmembrane axis). Binding sites for neutral lidocaine, identified from free energy minima, are labeled as intracellular I1-5, channel pore C1-2, and extracellular E1-6. (B) Transmembrane view of the channel with neutral lidocaine binding sites represented as colored surfaces. Colors and sizes are for clarity, not actual binding properties. (C) Close-up view of binding sites forming the hydrophobic (orange arrows) and hydrophilic (gray arrows) binding pathways. Lidocaine molecules (orange) and interacting residues on the channel (cyan for C, red for O and blue for N) are shown using stick representation.

Figure 4 – figure supplement 1

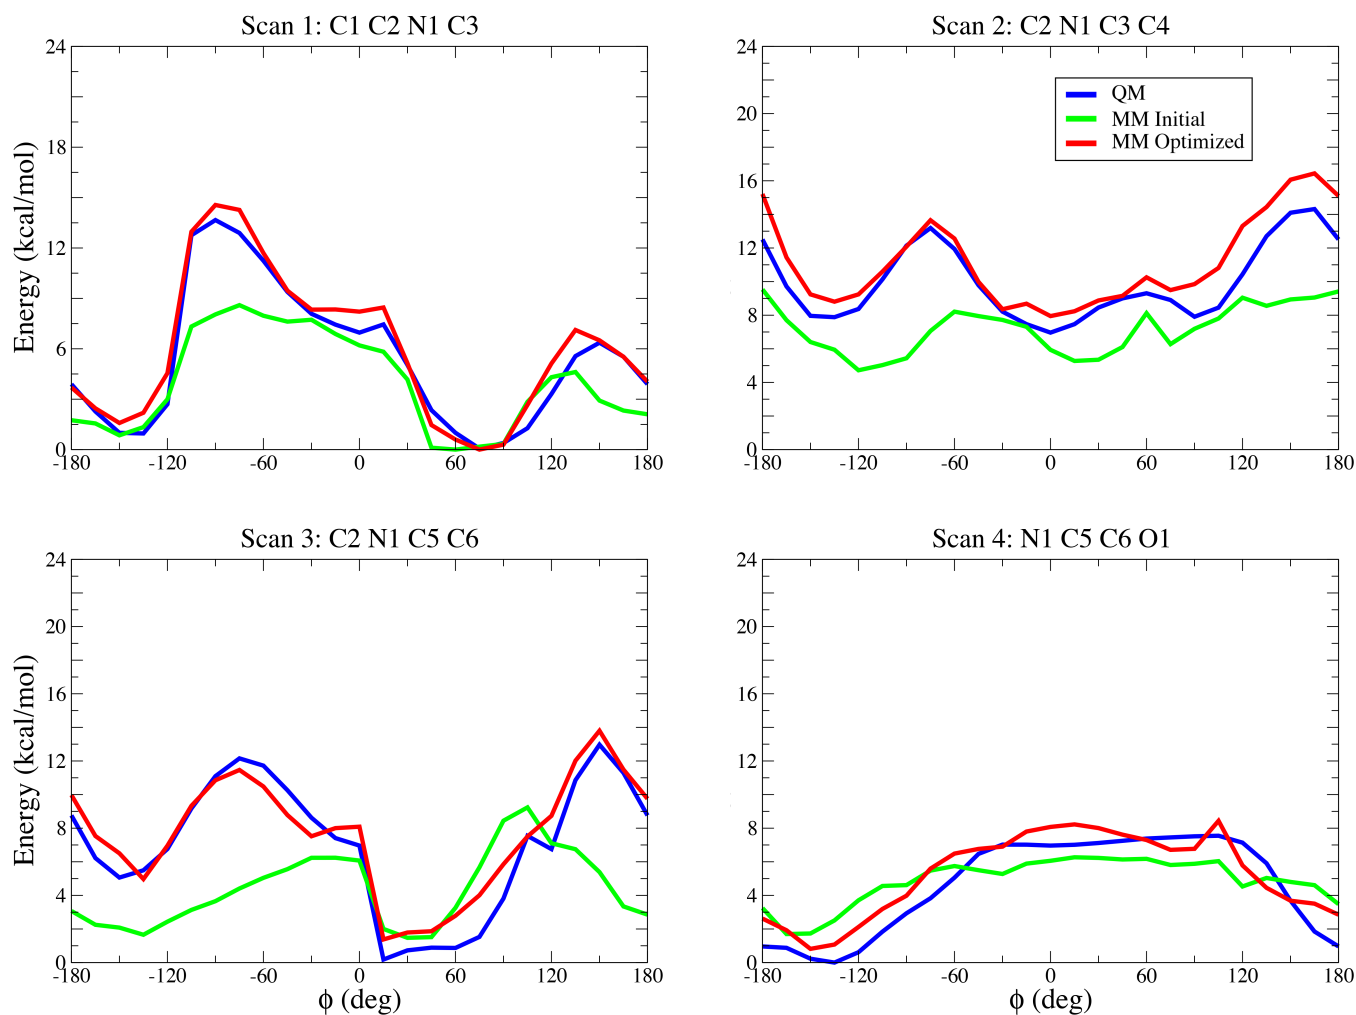

**Figure 4 – figure supplement 1.** Gas-phase torsional energy profiles for neutral lidocaine (LID0) from quantum mechanical (QM), initial and optimized molecular mechanics (MM) calculations. Atom names correspond to ones in topology and parameter files.

Figure 4 – figure supplement 2

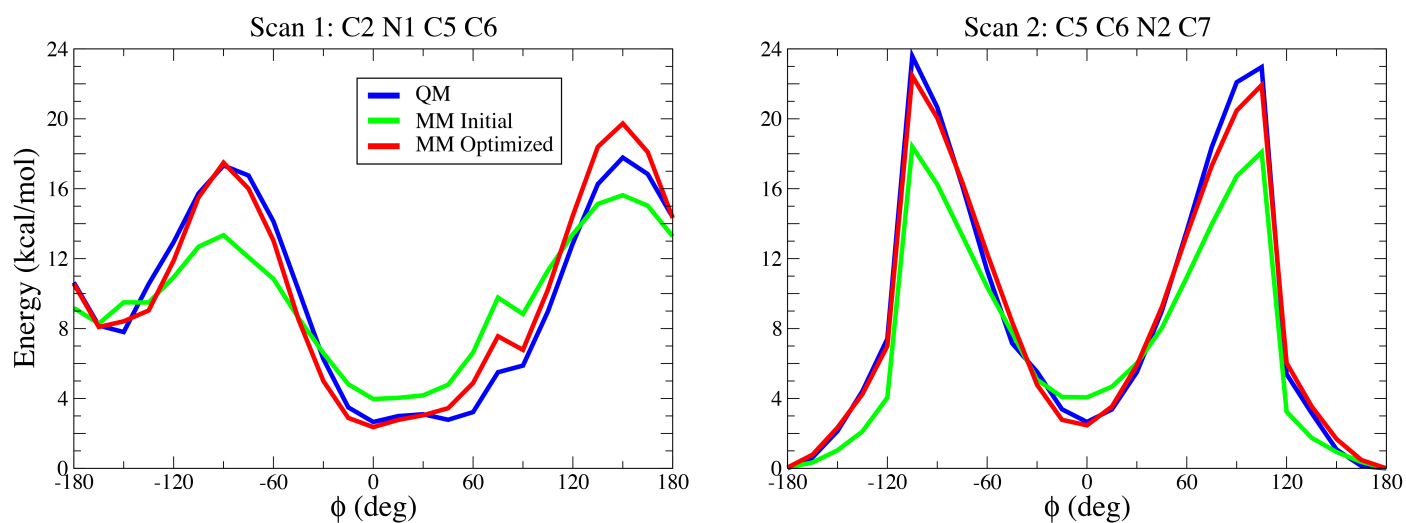

**Figure 4 – figure supplement 2.** Gas-phase torsional energy profiles for charged lidocaine (LID1) from quantum mechanical (QM), initial and optimized molecular mechanics (MM) calculations. Atom names correspond to ones in topology and parameter files.



Figure 4 – figure supplement 3

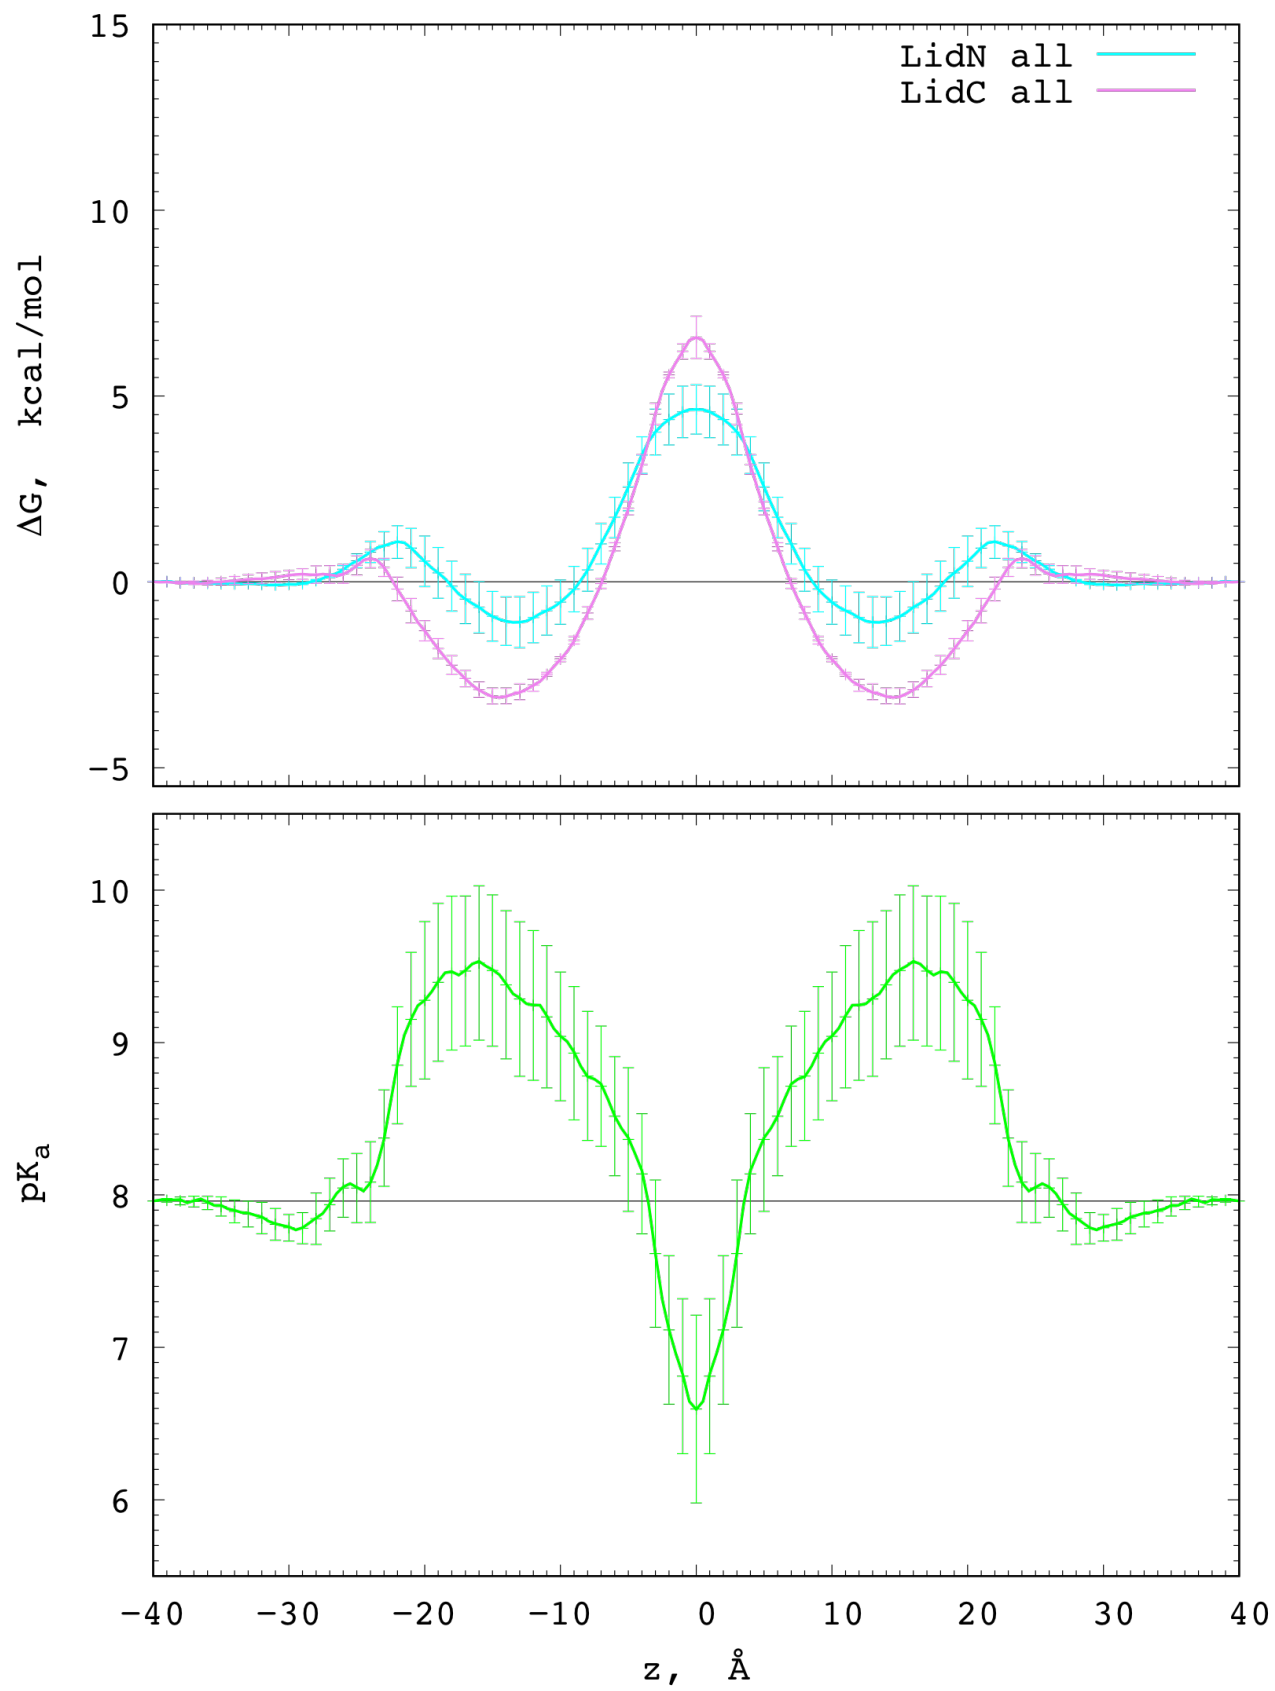

**Figure 4 – figure supplement 3.** Charged and neutral lidocaine translocation across a POPC membrane. PMF profiles for POPC membrane crossing neutral (cyan) and charged (magenta) drug (top) and corresponding pKa profile (bottom). Error bars computed as a measure of asymmetry.

Figure 5

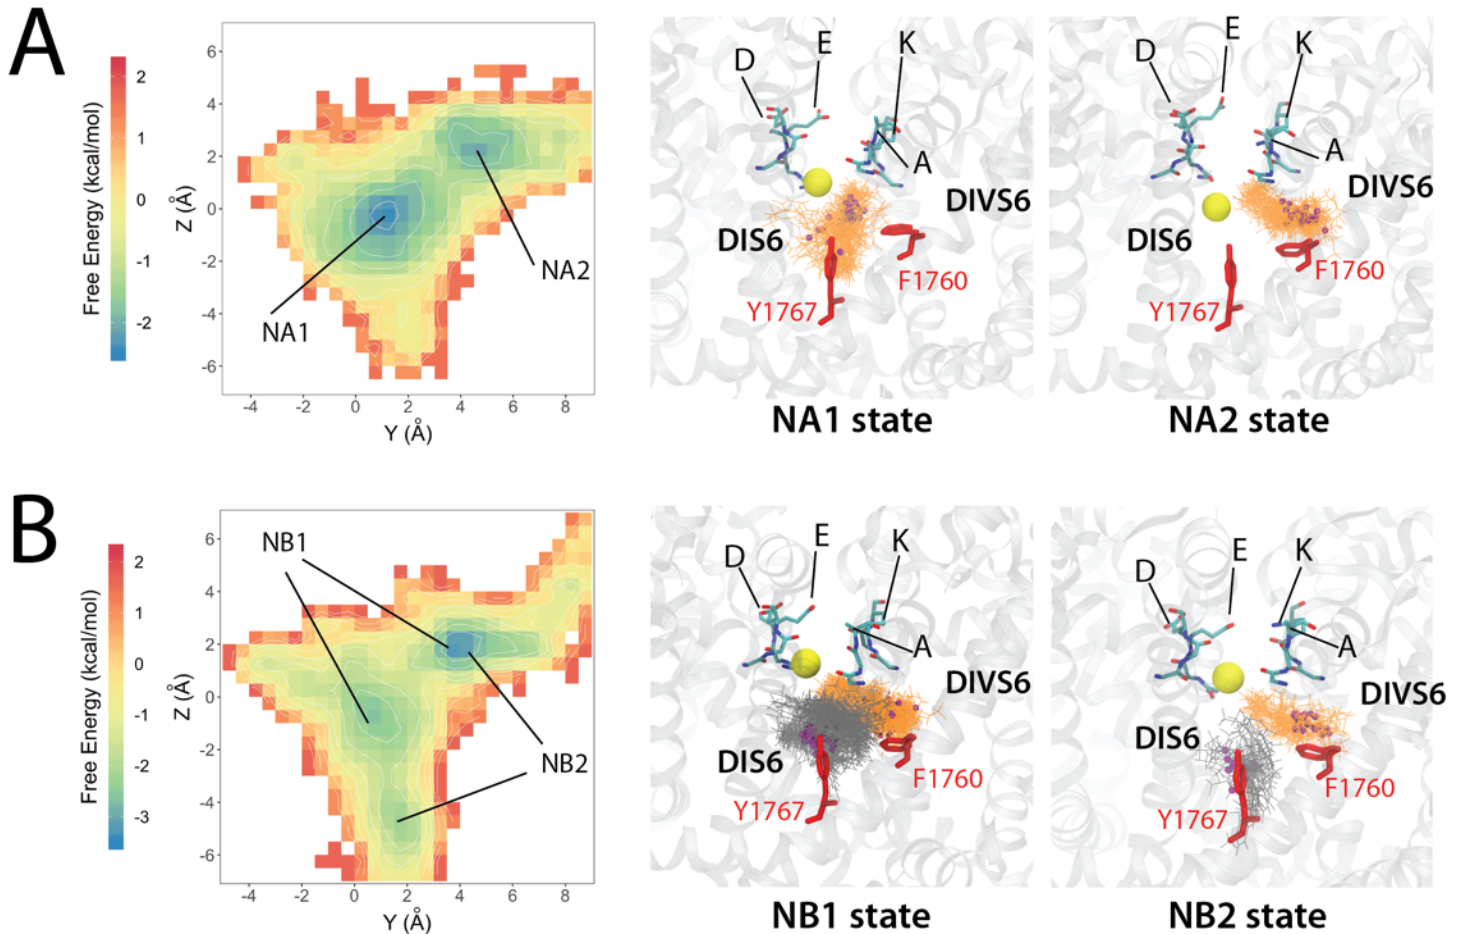

**Figure 5.** Molecular dynamics simulation of the hNav<sub>v</sub>1.5 channel interaction with neutral lidocaine reveal two binding poses: (A) states NA1 and NA2 for one lidocaine bound in the pore lumen; (B) NB1 and NB2 for two lidocaine molecules binding in the pore lumen at the same time. Left panels show free energy surfaces projected on the yz plane with binding sites identified from free energy minima and labeled. Middle and right panels show close-up transmembrane views of molecular models of charged lidocaine binding. In the close-up views lidocaine molecules (orange and dark-gray) and interacting residues on the channel (red) as well as SF “DEKA” motif (cyan for C, blue for N and red for O) are shown using stick representation. Lidocaine basic N atoms are shown as small purple spheres, and a SF bound Na<sup>+</sup> atom is shown as yellow sphere.

Figure 6

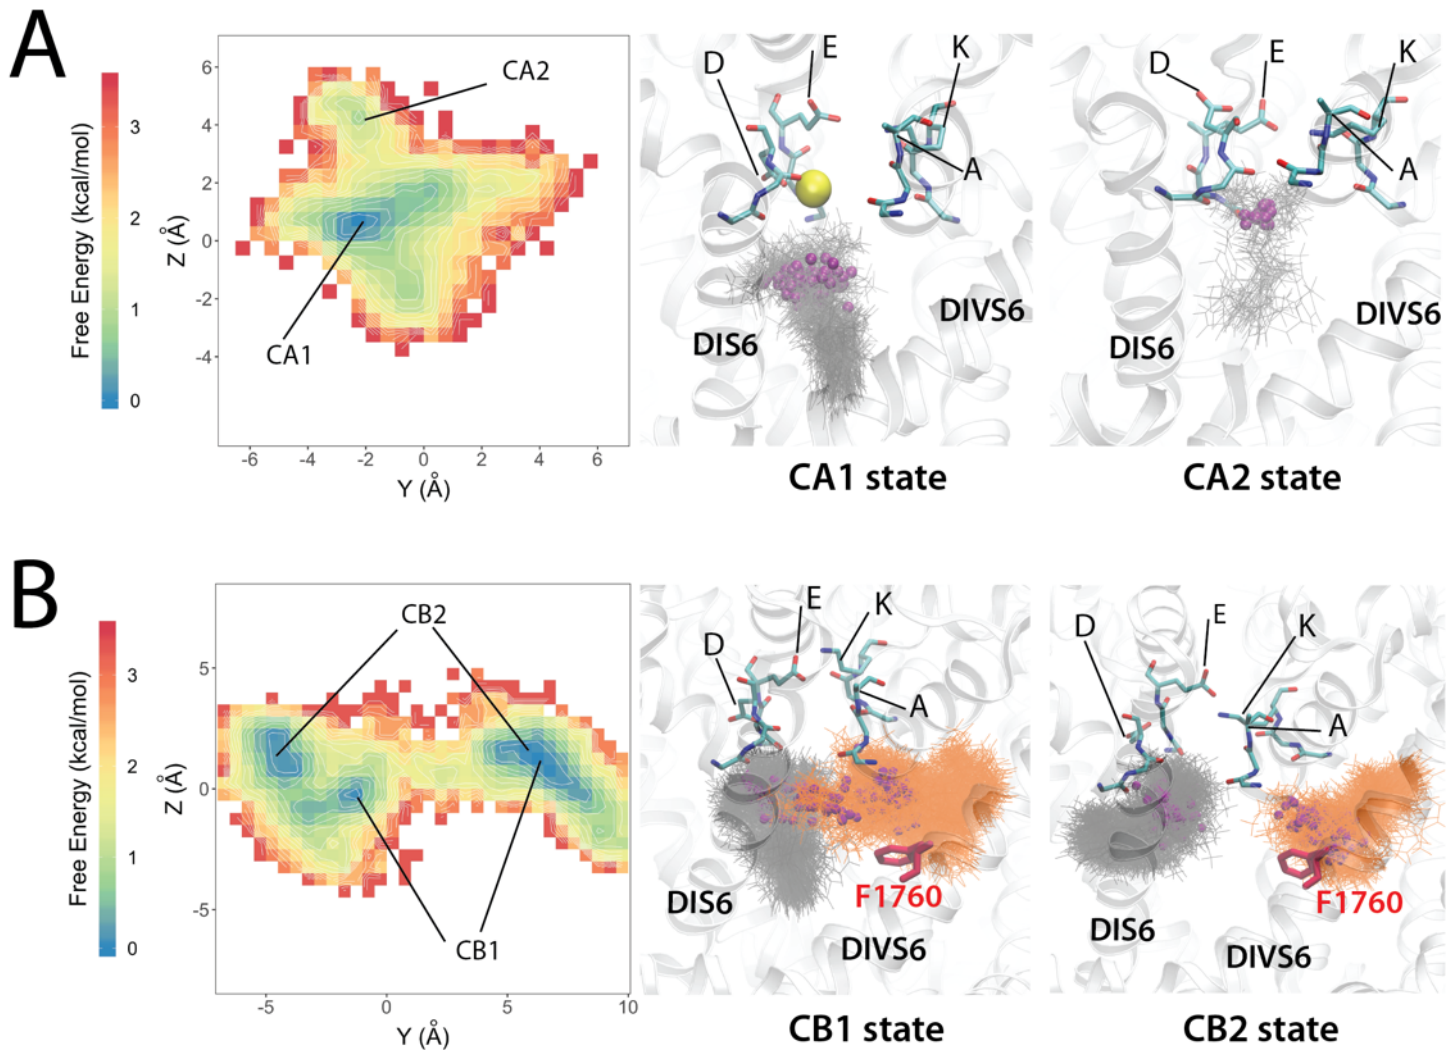

**Figure 6.** Molecular dynamics simulation of hNav1.5 channel interaction with charged lidocaine reveal two binding poses: (A) states CA1 and CA2 for one lidocaine bound in the pore lumen; (B) CB1 and CB2 for two lidocaine molecules binding in the pore lumen at the same time. Left panel shows free energy surface projected on the yz plane with binding sites identified from free energy minima and labeled. Middle and right panels show close-up transmembrane views of molecular models of charged lidocaine binding. Selectivity filter “DEKA” motif residues are shown in stick representation and colored in cyan for C, blue for N and red for O. Sodium ions are shown as spheres and colored in yellow. Lidocaine molecules are shown in stick representation and colored in gray or orange. The nitrogen atoms of the tertiary ammonium groups on charged lidocaine molecules are shown as small spheres and colored in purple. The F1760 sidechain is shown in stick representation and colored in red.

Figure 7

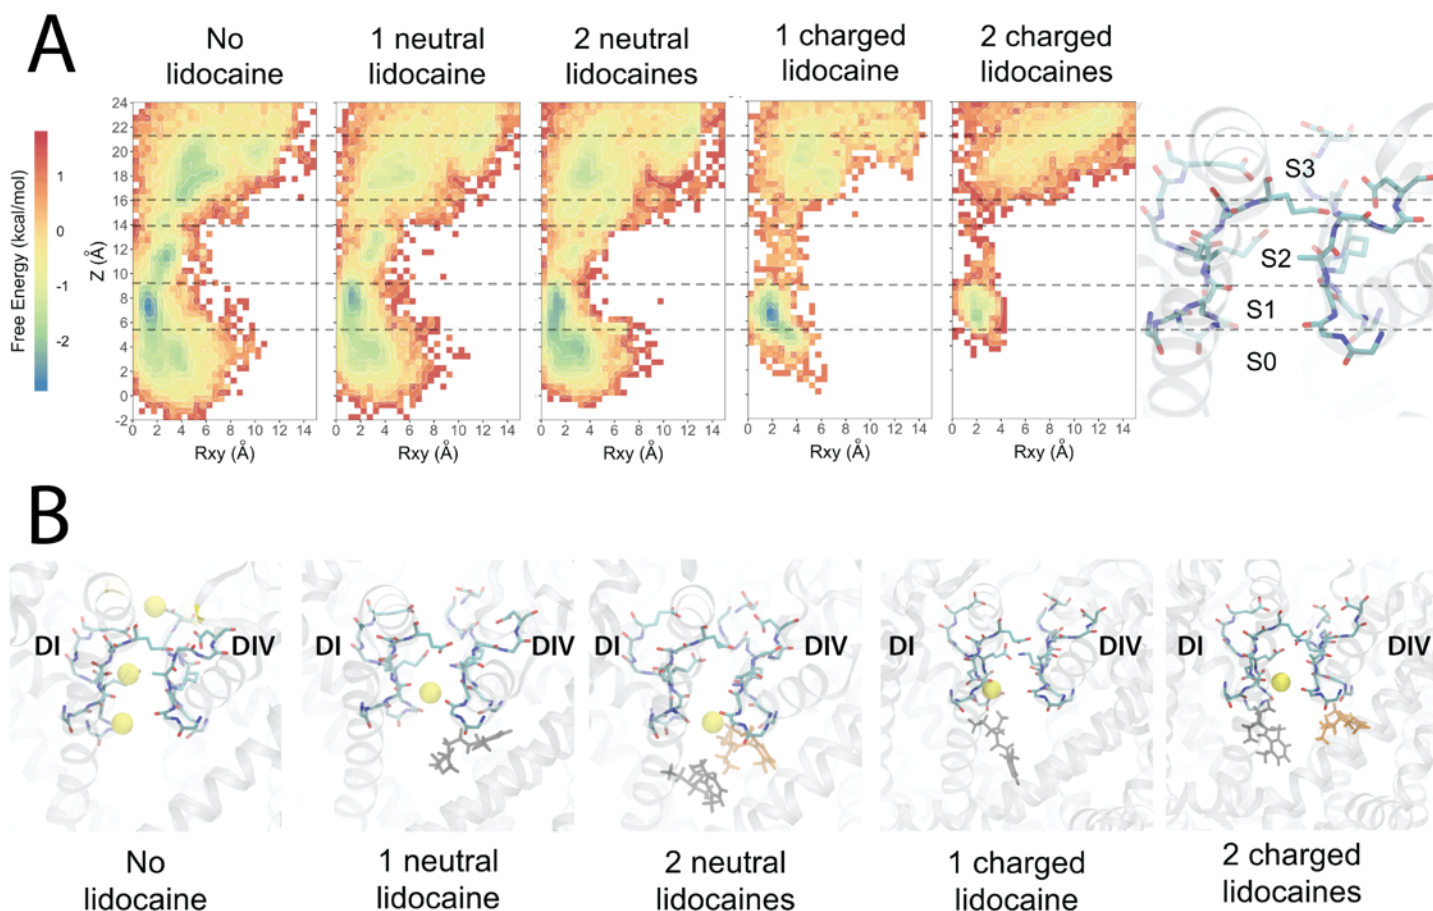

**Figure 7.** Molecular dynamics simulations reveal the free energy surfaces and binding sites for sodium ion within hNav1.5 pore. (A) Transmembrane view projection of the free energy surface for sodium ion without lidocaine and in the presence of 1 or 2 neutral or charged lidocaine molecules. Specific Na<sup>+</sup> binding sites are labeled S0, S1, S2, and S3 in the molecular representation of the channel SF on the right panel. (B) Representative transmembrane views of sodium ion binding sites within the selectivity filter region of the channel observed without lidocaine and in the presence of 1 or 2 neutral or charged lidocaine molecules. Sodium ions are shown as yellow spheres. The selectivity filter region residues are shown in stick representation and labeled.

1 **Appendix 1**

2  
3 **Structural Basis for Antiarrhythmic and Local Anesthetic Drug**  
4 **Interactions with the Human Cardiac Voltage-Gated Sodium**  
5 **Channel**  
6

7  
8  
9  
10  
11 **Phuong T. Nguyen<sup>1,2</sup>, Kevin R. DeMarco<sup>1,2</sup>, Igor Vorobyov<sup>2,3</sup>,**  
12 **Colleen E. Clancy<sup>2,3</sup>, Vladimir Yarov-Yarovoy<sup>2</sup>**  
13

14  
15  
16  
17 <sup>1</sup>Biophysics Graduate Group, UC Davis, Davis, CA, USA,

18 <sup>2</sup>Department of Physiology and Membrane Biology, UC Davis, Davis, CA, USA,

19 <sup>3</sup>Department of Pharmacology, UC Davis, Davis, CA, USA  
20

21 **Appendix S1. Charged lidocaine (LID1) optimized CHARMM force field topology and**  
22 **parameter files.**

```
23 * Initial topologies generated by
24 * CHARMM General Force Field (CGenFF) program version 1.0.0
25 * For use with CGenFF version 3.0.1
26 36 1
27
28 ! "penalty" is the highest penalty score of the associated parameters.
29 ! Penalties lower than 10 indicate the analogy is fair; penalties between
30 10
31 ! and 50 mean some basic validation is recommended; penalties higher than
32 ! 50 indicate poor analogy and mandate extensive validation/optimization.
33
34 !=====
35 ! Lidocaine +
36 !=====
37
38 RESI LID1          1.000
39 GROUP              ! CHARGE   CH_PENALTY
40 ATOM C1           CG331  -0.268 !    0.366
41 ATOM C2           CG324   0.057
42 ATOM N1           NG3P1  -0.264
43 ATOM C3           CG324   0.057
44 ATOM C4           CG331  -0.268 !    0.366
45 ATOM C5           CG324   0.493
46 ATOM C6           CG2O1   0.101
47 ATOM O1           OG2D1  -0.372 !    5.333
48 ATOM N2           NG2S1  -0.393
49 ATOM C7           CG2R61  0.021
50 ATOM C8           CG2R61  0.249
51 ATOM C9           CG2R61 -0.110 !    0.000
52 ATOM C10          CG2R61 -0.113 !    0.000
53 ATOM C11          CG2R61 -0.110 !    0.000
54 ATOM C12          CG2R61  0.249
55 ATOM C13          CG331  -0.466
56 ATOM C14          CG331  -0.466
57 ATOM H1           HGA3   0.090 !    0.060
58 ATOM H2           HGA3   0.090 !    0.060
59 ATOM H3           HGA3   0.090 !    0.060
60 ATOM H4           HGA2   0.090 !    0.000
61 ATOM H5           HGA2   0.090 !    0.000
62 ATOM H6           HGA2   0.090 !    0.000
63 ATOM H7           HGA2   0.090 !    0.000
64 ATOM H8           HGA3   0.090 !    0.060
65 ATOM H9           HGA3   0.090 !    0.060
66 ATOM H10          HGA3   0.090 !    0.060
67 ATOM H11          HGA2   0.090 !    3.750
68 ATOM H12          HGA2   0.090 !    3.750
69 ATOM H13          HGP1   0.318 !    7.260
70 ATOM H14          HGR61  0.115 !    0.000
71 ATOM H15          HGR61  0.115 !    0.000
72 ATOM H16          HGR61  0.115 !    0.000
73 ATOM H17          HGA3   0.090 !    0.000
74 ATOM H18          HGA3   0.090 !    0.000
```

```
75  ATOM H19      HGA3      0.090 !    0.000
76  ATOM H20      HGA3      0.090 !    0.000
77  ATOM H21      HGA3      0.090 !    0.000
78  ATOM H22      HGA3      0.090 !    0.000
79  ATOM H23      HGP2      0.320 !    1.252
80
81  BOND C1      C2
82  BOND C1      H1
83  BOND C1      H2
84  BOND C1      H3
85  BOND C2      N1
86  BOND C2      H4
87  BOND C2      H5
88  BOND N1      C3
89  BOND N1      C5
90  BOND N1      H23
91  BOND C3      C4
92  BOND C3      H6
93  BOND C3      H7
94  BOND C4      H8
95  BOND C4      H9
96  BOND C4      H10
97  BOND C5      C6
98  BOND C5      H11
99  BOND C5      H12
100 BOND C6      O1
101 BOND C6      N2
102 BOND N2      C7
103 BOND N2      H13
104 BOND C7      C12
105 BOND C7      C8
106 BOND C8      C9
107 BOND C8      C14
108 BOND C9      C10
109 BOND C9      H14
110 BOND C10     C11
111 BOND C10     H15
112 BOND C11     C12
113 BOND C11     H16
114 BOND C12     C13
115 BOND C13     H17
116 BOND C13     H18
117 BOND C13     H19
118 BOND C14     H20
119 BOND C14     H21
120 BOND C14     H22
121 IMPR C6      C5      N2      O1
122
123  END
124
125  BONDS
126
127  ANGLES
128  CG201  CG324  NG3P1    43.70    110.00 ! LID1 , from CG201 CG324 NG3P3,
129  penalty= 1.5
```

```
130 CG331 CG324 NG3P1 100.00 110.00 ! LID1 , from CG321 CG324 NG3P1,
131 penalty= 0.9
132
133 DIHEDRALS
134 NG2S1 CG2O1 CG324 NG3P1 0.4000 1 0.00 ! LID1 , from NG2S1
135 CG2O1 CG324 NG3P3, penalty= 1.5
136 OG2D1 CG2O1 CG324 NG3P1 0.0000 1 0.00 ! LID1 , from OG2D1
137 CG2O1 CG324 NG3P3, penalty= 1.5
138 CG324 CG2O1 NG2S1 CG2R61 0.7260 1 0.00
139 CG324 CG2O1 NG2S1 CG2R61 2.3230 2 180.00
140 NG3P1 CG324 CG331 HGA3 0.1600 3 0.00 ! LID1 , from NG3P0
141 CG324 CG331 HGA3, penalty= 1.2
142 CG2O1 CG324 NG3P1 CG324 2.2550 1 0.00
143 CG2O1 CG324 NG3P1 CG324 1.1680 2 0.00
144 CG2O1 CG324 NG3P1 CG324 0.5700 3 180.00
145 CG2O1 CG324 NG3P1 HGP2 3.0000 3 0.00
146 CG331 CG324 NG3P1 CG324 0.1000 3 0.00 ! LID1 , from CG321
147 CG324 NG3P1 CG324, penalty= 0.9
148 CG331 CG324 NG3P1 HGP2 0.1000 3 0.00 ! LID1 , from CG321
149 CG324 NG3P1 HGP2, penalty= 0.9
150
151 IMPROPER
152 CG2O1 CG324 NG2S1 OG2D1 120.0000 0 0.00 ! LID1 , from CG2O1
153 CG321 NG2S1 OG2D1, penalty= 0.1
154
155 END
156
```

## 157 **Appendix S1. Neutral lidocaine (LID0) optimized CHARMM force field topology** 158 **and parameter files.**

```
159 * Initial topologies generated by
160 * CHARMM General Force Field (CGenFF) program version 1.0.0
161 * For use with CGenFF version 3.0.1
162 36 1
163
164 ! "penalty" is the highest penalty score of the associated parameters.
165 ! Penalties lower than 10 indicate the analogy is fair; penalties between
166 10
167 ! and 50 mean some basic validation is recommended; penalties higher than
168 ! 50 indicate poor analogy and mandate extensive validation/optimization.
169
170 !=====
171 ! Lidocaine 0
172 !=====
173
174 RESI LID0 0.000
175 GROUP ! CHARGE CH_PENALTY
176 ATOM C1 CG331 -0.273 ! 3.560
177 ATOM C2 CG321 -0.048 ! 9.830
178 ATOM N1 NG301 -0.515
179 ATOM C3 CG321 -0.048 ! 9.830
180 ATOM C4 CG331 -0.273 ! 3.560
181 ATOM C5 CG321 0.310
```



|     |      |     |        |          |       |
|-----|------|-----|--------|----------|-------|
| 182 | ATOM | C6  | CG2O1  | 0.635    |       |
| 183 | ATOM | O1  | OG2D1  | -0.491 ! | 9.416 |
| 184 | ATOM | N2  | NG2S1  | -0.749   |       |
| 185 | ATOM | C7  | CG2R61 | 0.477    |       |
| 186 | ATOM | C8  | CG2R61 | 0.409    |       |
| 187 | ATOM | C9  | CG2R61 | -0.110 ! | 0.000 |
| 188 | ATOM | C10 | CG2R61 | -0.113 ! | 0.000 |
| 189 | ATOM | C11 | CG2R61 | -0.110 ! | 0.000 |
| 190 | ATOM | C12 | CG2R61 | 0.409    |       |
| 191 | ATOM | C13 | CG331  | -0.897   |       |
| 192 | ATOM | C14 | CG331  | -0.897   |       |
| 193 | ATOM | H1  | HGA3   | 0.090 !  | 0.030 |
| 194 | ATOM | H2  | HGA3   | 0.090 !  | 0.030 |
| 195 | ATOM | H3  | HGA3   | 0.090 !  | 0.030 |
| 196 | ATOM | H4  | HGA2   | 0.090 !  | 3.536 |
| 197 | ATOM | H5  | HGA2   | 0.090 !  | 3.536 |
| 198 | ATOM | H6  | HGA2   | 0.090 !  | 3.536 |
| 199 | ATOM | H7  | HGA2   | 0.090 !  | 3.536 |
| 200 | ATOM | H8  | HGA3   | 0.090 !  | 0.030 |
| 201 | ATOM | H9  | HGA3   | 0.090 !  | 0.030 |
| 202 | ATOM | H10 | HGA3   | 0.090 !  | 0.030 |
| 203 | ATOM | H11 | HGA2   | 0.090 !  | 3.536 |
| 204 | ATOM | H12 | HGA2   | 0.090 !  | 3.536 |
| 205 | ATOM | H13 | HGP1   | 0.319 !  | 0.000 |
| 206 | ATOM | H14 | HGR61  | 0.115 !  | 0.000 |
| 207 | ATOM | H15 | HGR61  | 0.115 !  | 0.000 |
| 208 | ATOM | H16 | HGR61  | 0.115 !  | 0.000 |
| 209 | ATOM | H17 | HGA3   | 0.090 !  | 0.000 |
| 210 | ATOM | H18 | HGA3   | 0.090 !  | 0.000 |
| 211 | ATOM | H19 | HGA3   | 0.090 !  | 0.000 |
| 212 | ATOM | H20 | HGA3   | 0.090 !  | 0.000 |
| 213 | ATOM | H21 | HGA3   | 0.090 !  | 0.000 |
| 214 | ATOM | H22 | HGA3   | 0.090 !  | 0.000 |
| 215 |      |     |        |          |       |
| 216 | BOND | C1  | C2     |          |       |
| 217 | BOND | C1  | H1     |          |       |
| 218 | BOND | C1  | H2     |          |       |
| 219 | BOND | C1  | H3     |          |       |
| 220 | BOND | C2  | N1     |          |       |
| 221 | BOND | C2  | H4     |          |       |
| 222 | BOND | C2  | H5     |          |       |
| 223 | BOND | N1  | C3     |          |       |
| 224 | BOND | N1  | C5     |          |       |
| 225 | BOND | C3  | C4     |          |       |
| 226 | BOND | C3  | H6     |          |       |
| 227 | BOND | C3  | H7     |          |       |
| 228 | BOND | C4  | H8     |          |       |
| 229 | BOND | C4  | H9     |          |       |
| 230 | BOND | C4  | H10    |          |       |
| 231 | BOND | C5  | C6     |          |       |
| 232 | BOND | C5  | H11    |          |       |
| 233 | BOND | C5  | H12    |          |       |
| 234 | BOND | C6  | O1     |          |       |
| 235 | BOND | C6  | N2     |          |       |
| 236 | BOND | N2  | C7     |          |       |

```
237 BOND N2 H13
238 BOND C7 C12
239 BOND C7 C8
240 BOND C8 C9
241 BOND C8 C14
242 BOND C9 C10
243 BOND C9 H14
244 BOND C10 C11
245 BOND C10 H15
246 BOND C11 C12
247 BOND C11 H16
248 BOND C12 C13
249 BOND C13 H17
250 BOND C13 H18
251 BOND C13 H19
252 BOND C14 H20
253 BOND C14 H21
254 BOND C14 H22
255 IMPR C6 C5 N2 O1
256
257 END
258
259 BONDS
260 CG321 NG301 263.00 1.4740 ! LID0 , from CG321 NG311, penalty= 5
261
262 ANGLES
263 CG201 CG321 NG301 43.70 110.00 ! LID0 , from CG202 CG321 NG321,
264 penalty= 3.3
265 CG331 CG321 NG301 43.70 112.20 ! LID0 , from CG331 CG321 NG311,
266 penalty= 0.6
267 NG301 CG321 HGA2 32.40 109.50 50.00 2.13000 ! LID0 , from
268 NG311 CG321 HGA2, penalty= 0.6
269 CG321 NG301 CG321 52.597 92.533
270
271 DIHEDRALS
272 NG301 CG321 CG331 HGA3 0.1600 3 0.00 ! LID0 , from NG311
273 CG321 CG331 HGA3, penalty= 0.6
274 NG2S1 CG201 CG321 NG301 0.8900 1 0.00
275 CG201 CG321 NG301 CG321 2.9130 1 0.00
276 CG201 CG321 NG301 CG321 0.6530 2 0.00
277 CG201 CG321 NG301 CG321 1.6990 3 0.00
278 OG2D1 CG201 CG321 NG301 2.5020 1 0.00
279 CG331 CG321 NG301 CG321 1.5370 1 0.00
280 CG331 CG321 NG301 CG321 0.3330 2 0.00
281 CG331 CG321 NG301 CG321 1.3380 3 0.00
282 HGA2 CG321 NG301 CG321 0.2650 3 180.00
283
284 IMPROPER
285
286
287 end
288
289
290
```

## 291 **Appendix S2. RosettaLigand docking scripts**

```
292
293 <ROSETTASCRIPTS>
294   <SCOREFXNS>
295     <ligand_soft_rep weights="ligand_soft_rep">
296       <Reweight scoretype="fa_elec" weight="0.42"/>
297       <Reweight scoretype="hbond_bb_sc" weight="1.3"/>
298       <Reweight scoretype="hbond_sc" weight="1.3"/>
299       <Reweight scoretype="rama" weight="0.2"/>
300     </ligand_soft_rep>
301
302     <hard_rep weights=ligand>
303       <Reweight scoretype="fa_intra_rep" weight="0.004"/>
304       <Reweight scoretype="fa_elec" weight="0.42"/>
305       <Reweight scoretype="hbond_bb_sc" weight="1.3"/>
306       <Reweight scoretype="hbond_sc" weight="1.3"/>
307       <Reweight scoretype="rama" weight="0.2"/>
308     </hard_rep>
309   </SCOREFXNS>
310
311   <LIGAND_AREAS>
312     <docking_sidechain chain="X" cutoff="7.0"
313 add_nbr_radius="true" all_atom_mode="true" minimize_ligand="10"/>
314     <final_sidechain chain="X" cutoff="7.0" add_nbr_radius="true"
315 all_atom_mode="true"/>
316     <final_backbone chain="X" cutoff="7.0" add_nbr_radius="false"
317 all_atom_mode="true" Calpha_restraints="0.3"/>
318   </LIGAND_AREAS>
319
320   <INTERFACE_BUILDERS>
321     <side_chain_for_docking ligand_areas="docking_sidechain"/>
322     <side_chain_for_final ligand_areas="final_sidechain"/>
323     <backbone ligand_areas="final_backbone" extension_window="3"/>
324   </INTERFACE_BUILDERS>
325
326   <MOVEMAP_BUILDERS>
327     <docking_sc_interface="side_chain_for_docking"
328 minimize_water="true"/>
329     <final_sc_interface="side_chain_for_final"
330 bb_interface="backbone" minimize_water="true"/>
331   </MOVEMAP_BUILDERS>
332
333   <SCORINGGRIDS ligand_chain="X" width="20">
334     <vdw grid_type="ClassicGrid" weight="1.0"/>
335   </SCORINGGRIDS>
336
337 <MOVERS>
338   <Transform name="transform" chain="X" box_size="10.0"
339 move_distance="0.1" angle="5" cycles="1000" repeats="1"
340 temperature="5" initial_perturb="10.0"/>
```

```
341     <HighResDocker name="high_res_docker" cycles="6"
342 repack_every_Nth="3" scorefxn="ligand_soft_rep"
343 movemap_builder="docking"/>
344     <FinalMinimizer name="final" scorefxn="hard_rep"
345 movemap_builder="final"/>
346     <InterfaceScoreCalculator name="add_scores" chains="X"
347 scorefxn="hard_rep" compute_grid_scores="0"
348 native="/home/tigerous/projects/input/EeNav-hNav1.5-open-inactivated-
349 lidocaine0/EeNav-hNav1.5-open-inactivated-lidocaine0.pdb"/>
350     AddJobPairData name="system_name" key="system_name"
351 value_type="string" value_from_ligand_chain="X"
352
353     <ParsedProtocol name="low_res_dock">
354         <Add mover_name="transform"/>
355     </ParsedProtocol>
356
357     <ParsedProtocol name="high_res_dock">
358         <Add mover_name="high_res_docker"/>
359         <Add mover_name="final"/>
360     </ParsedProtocol>
361
362     <ParsedProtocol name="reporting">
363         <Add mover_name="add_scores"/>
364         Add mover_name="system_name"
365     </ParsedProtocol>
366 </MOVERS>
367
368 <PROTOCOLS>
369     <Add mover_name="low_res_dock"/>
370     <Add mover_name="high_res_dock"/>
371     <Add mover_name="reporting"/>
372 </PROTOCOLS>
373
374 </ROSETTASCRIPTS>
375
```

## 376 **Appendix S2. RosettaLigand docking flags**

```
377
378 /home/tigerous/Rosetta_workstation/main/source/bin/rosetta_scripts.lin
379 uxgccrelease \
380 -in:path:database /home/tigerous/Rosetta_workstation/main/database \
381 -in:file:s /home/tigerous/projects/input/EeNav-hNav1.5-open-
382 inactivated-refine-lidocaine0/20-models/${SLURM_ARRAY_TASK_ID}.pdb \
383 -in:file:native /home/tigerous/projects/input/EeNav-hNav1.5-open-
384 inactivated-refine-lidocaine0/20-models/${SLURM_ARRAY_TASK_ID}.pdb \
385 -parser:protocol /home/tigerous/projects/input/EeNav-hNav1.5-open-
386 inactivated-refine-lidocaine0/EeNav-hNav1.5-open-inactivated-refine-
387 lidocaine0-20ligand-10A.xml \
388 -nstruct 2000 \
```

```
389 -extra_res_fa /home/tigerous/projects/input/EeNav-hNav1.5-open-
390 inactivated-refine-lidocaine0/EeNav-hNav1.5-open-inactivated-refine-
391 lidocaine0.params \
392 -use_input_sc \
393 -packing \
394 -ex1 \
395 -ex2 \
396 -extrachi_cutoff 3 \
397 -out:prefix docking_ligand \
398 -out:file:silent /share/work/tigerous/work/Dock-ligand-20ligands-200k-
399 EeNav-hNav1.5-open-inactivated-refine-lidocaine0-
400 _/${SLURM_ARRAY_TASK_ID}/docking_ligand_EeNav-hNav1.5-open-
401 inactivated-refine-lidocaine0_${SLURM_ARRAY_TASK_ID}.silent \
402 -out:file:silent_struct_type binary \
403 -mute all
```

|      | LID1   |      | LID0   |
|------|--------|------|--------|
| C1   | -0.268 | C1   | -0.273 |
| C2 * | 0.057  | C2   | -0.048 |
| N1 * | -0.264 | N1 * | -0.515 |
| C3 * | 0.057  | C3   | -0.048 |
| C4   | -0.268 | C4   | -0.273 |
| C5 * | 0.493  | C5 * | 0.31   |
| C6 * | 0.101  | C6 * | 0.635  |
| O1   | -0.372 | O1   | -0.491 |
| N2 * | -0.393 | N2 * | -0.749 |
| C7 * | 0.021  | C7 * | 0.477  |
| C8 * | 0.249  | C8 * | 0.409  |
| C9   | -0.11  | C9   | -0.11  |
| C10  | -0.113 | C10  | -0.113 |
| C11  | -0.11  | C11  | -0.11  |
| C12* | 0.249  | C12* | 0.409  |
| C13* | -0.466 | C13* | -0.897 |
| C14* | -0.466 | C14* | -0.897 |
| H1   | 0.09   | H1   | 0.09   |
| H2   | 0.09   | H2   | 0.09   |
| H3   | 0.09   | H3   | 0.09   |
| H4   | 0.09   | H4   | 0.09   |
| H5   | 0.09   | H5   | 0.09   |
| H6   | 0.09   | H6   | 0.09   |
| H7   | 0.09   | H7   | 0.09   |
| H8   | 0.09   | H8   | 0.09   |
| H9   | 0.09   | H9   | 0.09   |
| H10  | 0.09   | H10  | 0.09   |
| H11  | 0.09   | H11  | 0.09   |
| H12  | 0.09   | H12  | 0.09   |
| H13  | 0.318  | H13  | 0.319  |
| H14  | 0.115  | H14  | 0.115  |
| H15  | 0.115  | H15  | 0.115  |
| H16  | 0.115  | H16  | 0.115  |
| H17  | 0.09   | H17  | 0.09   |
| H18  | 0.09   | H18  | 0.09   |
| H19  | 0.09   | H19  | 0.09   |
| H20  | 0.09   | H20  | 0.09   |
| H21  | 0.09   | H21  | 0.09   |
| H22  | 0.09   | H22  | 0.09   |
| H23  | 0.32   |      |        |

**Table S1.** Partial atomic charges for charged (LID1) and neutral (LID0) lidocaine models. (Optimized charge values are shown by asterisk)

| LIDO | QME    | MME    | MME-QME | QMD   | MMD   | MMD-QMD |
|------|--------|--------|---------|-------|-------|---------|
| N1   | -9.401 | -8.017 | 1.384   | 3.115 | 3.115 | 0       |
| N2   | -0.265 | -1.823 | -1.558  | 5.664 | 5.264 | -0.4    |
| O1   | -6.963 | -6.138 | 0.825   | 2.96  | 2.96  | 0       |
| H1   | -0.452 | -0.369 | 0.083   | 2.902 | 3.002 | 0.1     |
| H2   | -1.196 | -0.46  | 0.736   | 2.84  | 3.04  | 0.2     |
| H3   | 0.074  | 0.781  | 0.707   | 2.529 | 2.879 | 0.35    |
| H4   | -0.735 | -1.274 | -0.539  | 2.958 | 2.908 | -0.05   |
| H6   | -1.222 | -0.693 | 0.529   | 3.099 | 3.399 | 0.3     |
| H7   | -1.166 | -1.891 | -0.725  | 2.904 | 2.904 | 0       |
| H8   | -0.983 | -0.83  | 0.153   | 2.836 | 2.936 | 0.1     |
| H9   | -2.948 | -3.704 | -0.756  | 2.866 | 2.966 | 0.1     |
| H10  | -0.8   | -0.241 | 0.559   | 2.706 | 2.956 | 0.25    |
| H11  | -2.826 | -2.991 | -0.165  | 3.017 | 3.167 | 0.15    |
| H12  | -1.855 | -3.259 | -1.404  | 2.659 | 2.759 | 0.1     |
| H13  | -6.193 | -6.374 | -0.181  | 2.225 | 2.175 | -0.05   |
| H14  | -1.864 | -1.331 | 0.533   | 2.578 | 2.878 | 0.3     |
| H15  | -1.517 | -1.633 | -0.116  | 2.614 | 2.864 | 0.25    |
| H16  | -1.59  | -1.096 | 0.494   | 2.586 | 2.886 | 0.3     |
| H17  | 1.485  | 1.99   | 0.505   | 2.958 | 3.358 | 0.4     |
| H18  | -1.188 | 0.222  | 1.41    | 2.73  | 3.13  | 0.4     |
| H19  | -1.394 | -1.066 | 0.328   | 3.116 | 3.516 | 0.4     |
| H20  | -2.655 | -1.013 | 1.642   | 2.588 | 2.988 | 0.4     |
| H21  | -1.946 | -0.159 | 1.787   | 2.634 | 3.034 | 0.4     |
| H22  | -4.707 | -2.995 | 1.712   | 2.423 | 2.823 | 0.4     |
| RMSE |        |        | 0.95    |       |       | 0.27    |

**Table S2.** Gas-phase cationic lidocaine (LID1) – water interactions.

| LID1 | QME     | MME     | MME-QME | QMD   | MMD  | MMD-QMD |
|------|---------|---------|---------|-------|------|---------|
| N2   | 0.88    | 0.56    | -0.33   | 6.28  | 5.88 | -0.40   |
| O1   | -4.00   | -5.78   | -1.78   | 3.01  | 2.91 | -0.10   |
| H1   | -6.39   | -4.80   | 1.60    | 2.37  | 2.77 | 0.40    |
| H2   | -8.40   | -6.33   | 2.06    | 2.44  | 2.79 | 0.35    |
| H3   | -7.64   | -5.686  | 1.95    | 2.271 | 2.67 | 0.4     |
| H4   | -9.043  | -8.254  | 0.79    | 2.304 | 2.70 | 0.4     |
| H6   | -8.438  | -6.531  | 1.91    | 2.753 | 3.15 | 0.4     |
| H7   | -9.138  | -8.449  | 0.69    | 2.301 | 2.70 | 0.4     |
| H8   | -6.663  | -4.984  | 1.68    | 2.361 | 2.76 | 0.4     |
| H9   | -8.891  | -7.261  | 1.63    | 2.447 | 2.80 | 0.35    |
| H10  | -7.672  | -5.898  | 1.77    | 2.323 | 2.72 | 0.4     |
| H11  | -9.779  | -8.519  | 1.26    | 2.573 | 2.97 | 0.4     |
| H12  | -11.085 | -10.402 | 0.68    | 2.208 | 2.61 | 0.4     |
| H13  | -13.116 | -13.253 | -0.14   | 2.013 | 2.06 | 0.05    |
| H14  | -4.7    | -2.893  | 1.81    | 2.417 | 2.82 | 0.4     |
| H15  | -4.274  | -2.576  | 1.70    | 2.416 | 2.82 | 0.4     |
| H16  | -4.453  | -2.732  | 1.72    | 2.433 | 2.83 | 0.4     |
| H17  | -4.021  | -2.87   | 1.15    | 4.599 | 5.00 | 0.4     |
| H18  | -4.503  | -2.996  | 1.51    | 2.514 | 2.86 | 0.35    |
| H19  | -5.583  | -5.227  | 0.36    | 3.086 | 3.44 | 0.35    |
| H20  | -5.584  | -4.465  | 1.12    | 2.533 | 2.83 | 0.3     |
| H21  | -4.857  | -3.112  | 1.75    | 2.479 | 2.83 | 0.35    |
| H22  | -4.789  | -3.724  | 1.07    | 2.7   | 3.00 | 0.3     |
| H23  | -3.948  | -3.501  | 0.45    | 3.194 | 3.54 | 0.35    |
| RMSE |         |         | 1.41    |       |      | 0.36    |

**Table S3.** Gas-phase neutral lidocaine (LID0) – water interactions.
